# Supplementary material
Source: PubMed Central journal article supplement (PMC6853785)
Supplement: glz220_suppl_supplementary_material.pdf [file glz220_suppl_supplementary_material.pdf]

## Supplementary Materials

### Supplementary Methods

#### Clinical labs

Blood and saliva samples were drawn from each subscriber every 189 days on average, and a battery of clinical chemistry measures was conducted using standard procedures. The clinical lab work contained many clinical analytes associated with biological health measures such as cardiometabolic health (including triglycerides, high-density lipoprotein (HDL), small low-density lipoprotein (LDL) particle number), diabetes (such as insulin, Hemoglobin A1c and fasting glucose), inflammation (such as TNF-alpha, interleukin 6, interleukin-8) and nutrition (including vitamin D (blood 25-dihydroxyvitamin D), copper and ferritin). Two vendors were used for clinical labs (Quest and LabCorp); their measurements are analyzed independently to account for vendor-specific effects. Measurements related to supplements commonly recommended by health coaches or derived from other analytes or age were dropped from the analysis in order to minimize confounding (for instance, individuals with worse clinical health metrics may be more inclined to take supplements). These dropped measures are detailed in **Supplemental Table 5**.

#### Metabolomics

Prior to processing, plasma was stored in a bio-storage facility at -80 C. Frozen plasma samples in anticoagulant Ethylenediaminetetraacetic acid (EDTA) were sent to Metabolon, Inc. to conduct metabolomics assays. Data were generated using the Metabolon HD4 discovery platform, a combination of ultra high-performance liquid chromatography (HPLC) tandem mass spectrometry (MS) and gas chromatography (GC) for identification of metabolites and fatty acids. Relative concentration values were reported for over 700 different metabolites, while the platform itself has the potential to measure up to 2200 unique metabolites though many remain unidentified. Existing metabolomics samples were run in several batches. Between four and sixteen previously generated pooled control samples were run with each batch and used for batch correction. ~1300 metabolomics samples were used in the analyses for this paper. KEGG pathway associations for each identified metabolite were provided by Metabolon. Measurements related to supplements commonly recommended by health coaches or derived from other analytes or age were identified in the Clinical Labs, and metabolites strongly correlated ( $r^2 > .05$ ) with these measures were dropped from the analysis in order to minimize confounding (for instance, individuals with worse clinical health metrics may be more inclined to take supplements). These dropped measures are detailed in **Supplemental Table 5**.

#### Proteomics

Proteomics analysis was performed on EDTA-anticoagulated plasma extracted from whole blood using Olink's proximity extension assay panels, including Cardiovascular II (<http://www.olink.com/products/cvd-ii-panel/>), Cardiovascular III (<http://www.olink.com/products/cvd-iii-panel/>), and Inflammation (<http://www.olink.com/products/inflammation/>); 92 proteins are measured on each panel. Prior to processing, plasma was stored in a bio-storage facility at -80 C. Existing proteomics samples were run in several batches. Two control samples were run with each batch. Batch correction was performed using median centering. 10 proteins were shared by at least 2 panels, providing another level of internal control.

#### Genomics

Whole genome sequencing was performed on 2806 participants. All whole genome sequencing was performed on DNA extracted from whole blood with library preparation using the Illumina TruSeq Nano Library prep kit and sequenced using Illumina technology (Illumina HiSeq X, PE-150, target 30X coverage) at a single CLIA-approved sequencing laboratory. Raw sequencing data were processed using a consistent bioinformatics pipeline, including BWA 0.7.12 for alignment to reference sequence hg19 and duplicate marking with biobam2 2.0.70. Variant calling was performed using GATK best practices for whole genome data with GATK 3.3.0, including indel local realignment followed by base quality recalibration. VCF files were produced by GATK HaplotypeCaller followed by GenotypeGVCFs. CNV calling from WGS data was performed using a bioinformatics pipeline on BAM files using CNVnator 0.3. Polygenic score computation and ancestry estimates were performed using the bioinformatics pipeline.

814 participants were genotyped using the Illumina Multi-Ethnic Global SNP Array at a single CLIA-approved lab. This array consisted of ~1.8 million variants. An additional ~38 million variants were imputed using the Haplotype Reference Consortium (HRC) panel as part of the bioinformatics pipeline. 56 individuals were missing genomic information; their genetic components were mean imputed.

Genetic ancestry was represented by principal components (PCs) 1-7 from an analysis of 107,280 linkage disequilibrium pruned autosomal SNPs with minor allele frequency > 5% using the combined PC-AiR(1) and PC-Relate(2) approach as described by Conomos et al. (3).

### **Lifestyle Information (Quantified self)**

Health history and behavioral assessments were performed at baseline and then every 6 months to obtain self-reported data on health status, including (but not limited to): tobacco and alcohol consumption; past and/or current incidence of multiple health outcomes (including cancer, cardiovascular and metabolic diseases, infections, respiratory diseases, mental health issues such as depression and anxiety, and others), family history of health outcomes (maternal, paternal, and sibling); and self-reported use of prescription drugs and nutritional supplements.

### **Data processing**

Proteomics, clinical labs, and metabolomics data were measured from the blood at the same blood draw for each participant. Analytes that were missing in more than 20% of the samples were removed from the analysis. Observations missing more than 10% of the remaining values were removed from the analysis. In order to minimize the effect of outliers, values greater than 3 standard deviations from the mean were iteratively shrunk to be within 3 standard deviations from the mean. Analytes that were calculated from other analytes, or were partially calculated using participant age (such as estimated Glomerular Filtration Rate), or were measures of values directly targeted by wellness coaching, were removed from the analysis (see Supplementary Table 5). Mean imputation was performed on the remaining missing data values. To account for variation in populations, the first 7 principal components (calculated using the method of Conomos, et al. (3) from each participant's genetic profile were added to each observation. All baseline ages were rounded to birth year, with age at observation being that rounded age plus the number of days in the wellness program at the time of the blood draw.

### **Demonstration of Equivalence of PCA KDM and reported analyte specific effect sizes**

The Klemara-Doubal Algorithm estimates the m-dimensional vectors of slopes ( $k$ ), intercepts ( $q$ ), and standard deviations ( $s$ ) of each element of the m-dimensional input vector ( $y$ ), and uses these parameters to estimate biological age. In this study, the input vector ( $y$ ) is a PCA transformation (the  $n \times m$  matrix  $W$ ) of the original data vector ( $x$ ), as represented in equation (1.1). The Biological Age estimate ( $BA_E$ ) from the  $y$  vector is computed by equation (1.2). Here we demonstrate that the summed effect sizes  $\beta$  for each original analyte in data vector  $x$  are equivalent to the originally estimated  $BA_E$  from the PCA transformed data equations (1.3-1.11).

$$y_i = \sum_{j=1 \dots n} W_{ij}^T x_j \quad (0.1)$$

$$BA_E = \frac{\sum_{i=1..m} (y_i - q_i) \frac{k_i}{s_i^2}}{\sum_{i=1..m} \left(\frac{k_i}{s_i}\right)^2} \quad (0.2)$$

$$\text{let } a = \frac{\frac{k}{s^2}}{\sum_{i=1..m} \left(\frac{k_i}{s_i}\right)^2}, \text{ for simplicity such that} \quad (0.3)$$

$$BA_E = \sum_{i=1..m} (y_i - q_i) a_i \quad (0.4)$$

$$BA_E = \sum_{i=1..m} (y_i a_i - q_i a_i) \quad (0.5)$$

$$BA_E = \sum_{i=1..m} y_i a_i - \sum_{i=1..m} q_i a_i \quad (0.6)$$

$$BA_E = \sum_{i=1..m} \left( \sum_{j=1..n} W_{ij}^T x_j \right) a_i - \sum_{i=1..m} q_i a_i \quad (0.7)$$

$$BA_E = \sum_{j=1..n} x_j \sum_{i=1..m} W_{ij}^T a_i - \sum_{i=1..m} q_i a_i \quad (0.8)$$

$$BA_E = \beta_0 + \sum_{j=1..n} \beta_j x_j, \text{ where} \quad (0.9)$$

$$\beta_j = \sum_{i=1..m} W_{ij}^T a_i \text{ and} \quad (0.10)$$

$$\beta_0 = - \sum_{i=1..m} q_i a_i \quad (0.11)$$

1. Conomos MP, Miller MB, Thornton TA. Robust inference of population structure for ancestry prediction and correction of stratification in the presence of relatedness. *Genet Epidemiol.* 2015;**39**:276-293.

2. Conomos MP, Reiner AP, Weir BS, Thornton TA. Model-free Estimation of Recent Genetic Relatedness. *Am J Hum Genet.* 2016;**98**:127-148.
3. Conomos MP, Laurie CA, Stilp AM, Gogarten SM, McHugh CP, Nelson SC, *et al.* Genetic Diversity and Association Studies in US Hispanic/Latino Populations: Applications in the Hispanic Community Health Study/Study of Latinos. *Am J Hum Genet.* 2016;**98**:165-184.

Supplementary Figures

Supplementary Figure 1 – BA estimates per data type

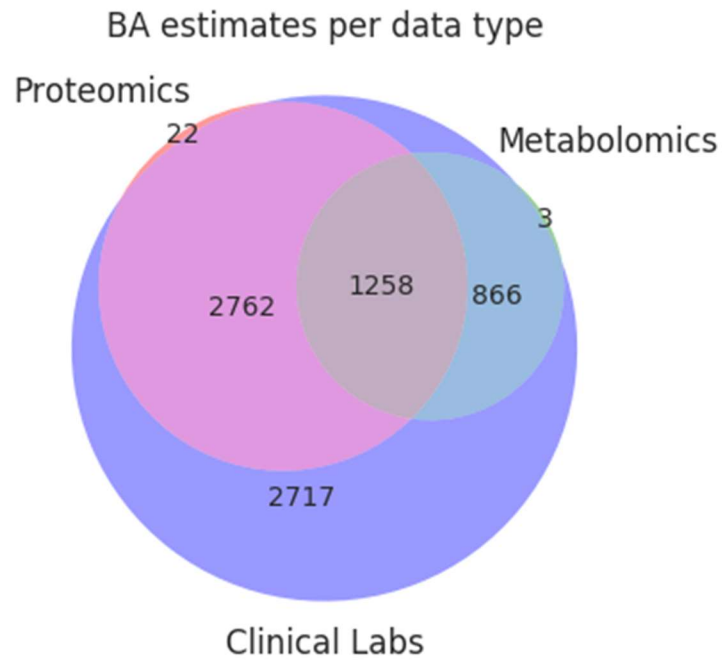

Venn diagram showing the number of observations per combination of data types.

**Supplementary Figure 2 –The concordance of  $\Delta$ Age between data types.**

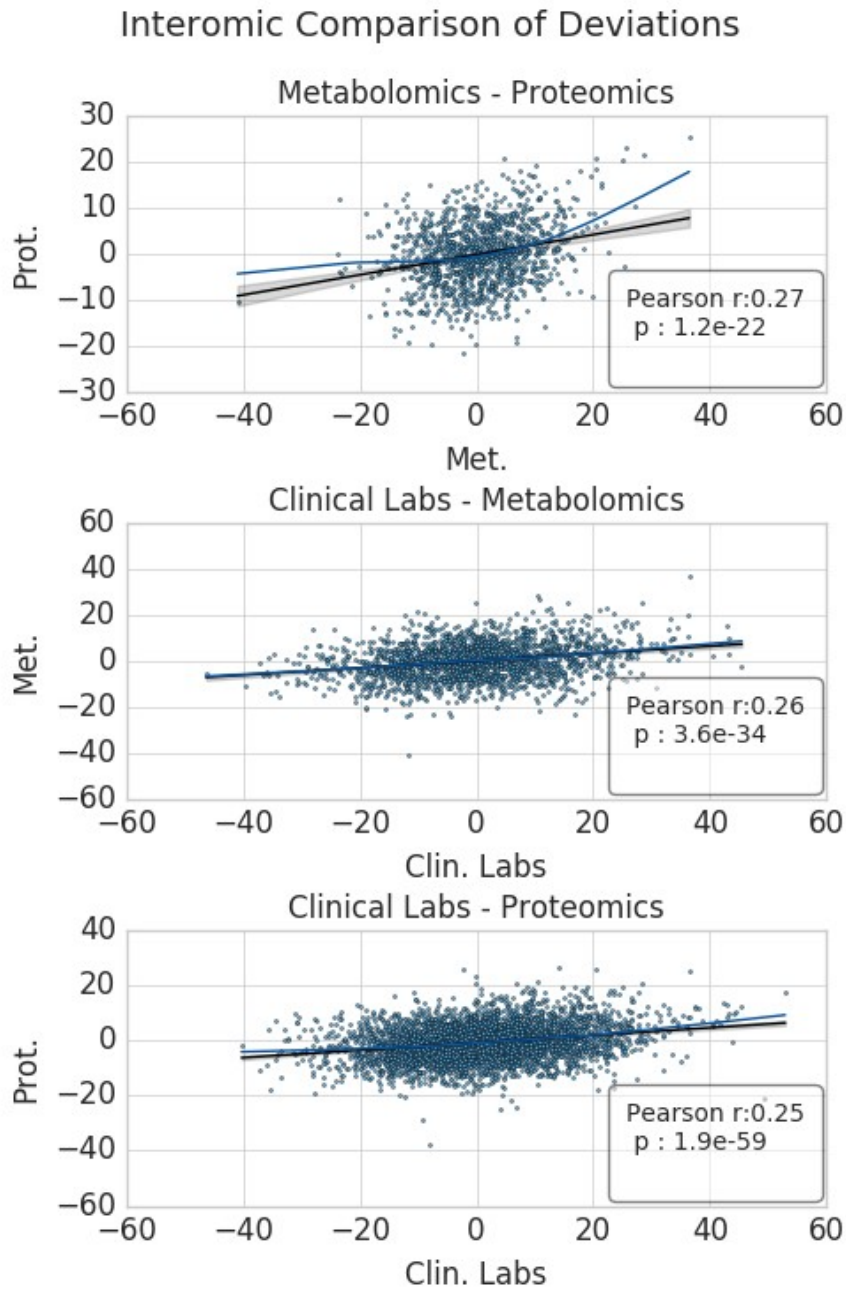

Each point is an observation with both data types present, with the  $\Delta$ Ages for each data type plotted to its corresponding axis. The Pearson r value and the p-value is reported for each comparison. The linear fit with a 95% confidence interval and LOWESS fit are shown.

**Supplementary Figure 3 - Contribution of metabolite families and subfamilies to BA predictions for males and females, measured by average weight per metabolite in each group.**

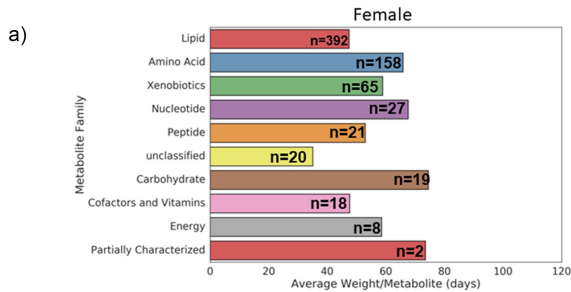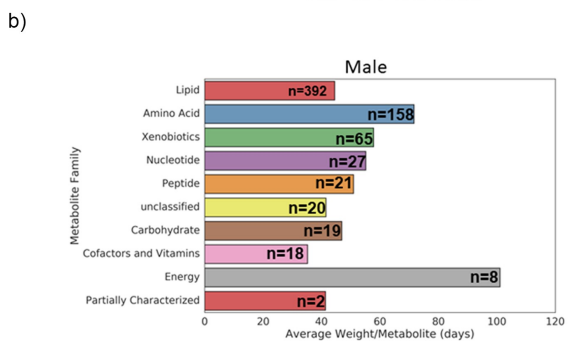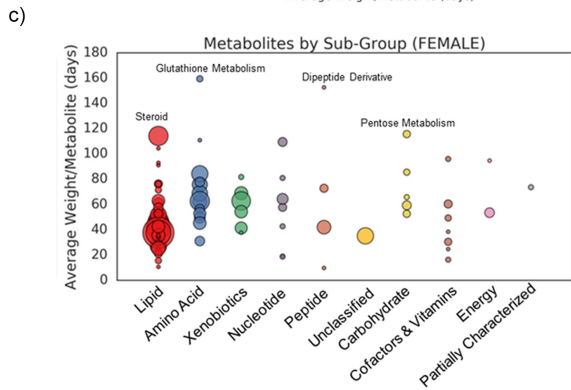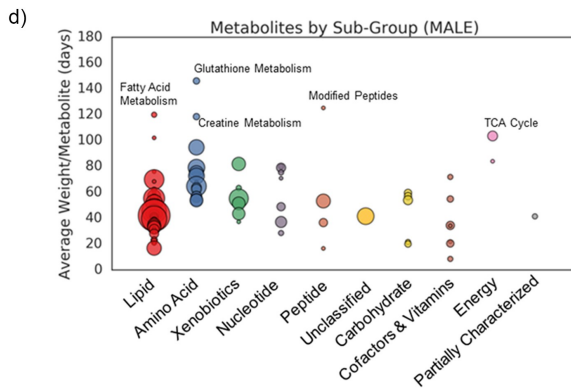

Average weights are expressed in days, corresponding to the average change in BA (positive or negative) for 1 standard deviation change in metabolite concentration. a) & b) The average contribution of each metabolite family in predicting BA for males (a) and females (b). The absolute value of the mean  $\beta$ -coefficient for each metabolite obtained using the KD algorithm across the cross-validation procedure was summed within each metabolite family and divided by the total number of metabolites for that family. The number of metabolites in each family is noted. c) & d) The same analysis was performed as in figures a) and b), but at the level of metabolite subfamilies. The y-axis corresponds to the mean contribution (positive or negative) of each metabolite subfamily to the overall BA prediction. Each sub-family data point is further sized by the number of metabolites measured in that subfamily in our metabolomics panel.



Supplementary Tables

**Supplementary Table 1. Baseline self-reported characteristics of the wellness program sample**

| Characteristic                                     | Total<br>N=3558        | Women<br>N=2087 | Men<br>N=1471 | P-value |
|----------------------------------------------------|------------------------|-----------------|---------------|---------|
| <i>Past and/or current self-report of:</i>         |                        |                 |               |         |
| Migraine, no. (%), n=3273                          | 774 (23.6)             | 605             | 169           | <0.001  |
| High cholesterol, no. (%), n=3351                  | 788 (23.5)             | 408             | 380           | <0.001  |
| Depression, no. (%), n=3312                        | 750 (22.6)             | 550             | 200           | <0.001  |
| Gastroesophageal reflux disease, no. (%),          | 619 (19.0)             | 381             | 238           | 0.4     |
| Hypertension, no. (%), n=3361                      | 579 (17.2)             | 313             | 266           | 0.003   |
| Asthma, no. (%), n=3389                            | 559 (16.5)             | 370             | 189           | <0.001  |
| Lung infection, no. (%), n=3265                    | 501 (15.3)             | 352             | 149           | <0.001  |
| Eczema, no. (%), n=3269                            | 468 (14.3)             | 337             | 131           | <0.001  |
| Colon polyps, no. (%), n=3285                      | 458 (13.9)             | 261             | 197           | 0.3     |
| Osteoarthritis no. (%), n=3398                     | 406 (11.9)             | 292             | 114 (8.3)     | <0.001  |
| Sleep apnea, no. (%), n=3295                       | 392 (11.9)             | 179 (9.1)       | 213           | <0.001  |
| Leiomyoma (fibroids), no. (%), n=1960 <sup>b</sup> | 332 (10.2)             | 329             | 3 (2.3)       | <0.001  |
| Concussion, no. (%), n=3265                        | 330 (10.1)             | 182 (9.4)       | 148           | 0.1     |
| Irritable Bowel Syndrome, no. (%), n=3225          | 300 (9.3)              | 227             | 73 (5.7)      | <0.001  |
| Breast lump, no. (%), n=3239                       | 299 (9.2)              | 290             | 9 (0.7)       | <0.001  |
| Endometriosis, no. (%), n=1945 <sup>b</sup>        | 162 (8.3) <sup>b</sup> | 162 (8.3)       | NA            | NA      |
| Enlarged prostate, no. (%), n=1315 <sup>c</sup>    | 100 (7.6) <sup>c</sup> | NA              | 100 (7.6)     | NA      |
| Kidney stones, no. (%), n=3239                     | 193 (6.0)              | 94 (4.9)        | 99 (7.6)      | 0.002   |
| Gallstones, no. (%), n=3228                        | 186 (5.8)              | 158 (8.1)       | 28 (2.2)      | <0.001  |
| Cataracts, no. (%), n=3315                         | 180 (5.4)              | 113 (5.7)       | 67 (5.0)      | 0.4     |
| Psoriasis, no. (%), n=3249                         | 154 (4.7)              | 90 (4.6)        | 64 (4.9)      | 0.8     |
| Post-traumatic stress disorder, no. (%),           | 149 (4.6)              | 122 (6.3)       | 27 (2.1)      | <0.001  |
| Thyroid nodules, no. (%), n=3257                   | 143 (4.4)              | 129 (6.6)       | 15 (1.1)      | <0.001  |
| Peptic ulcer, no. (%), n=3275                      | 134 (4.1)              | 87 (4.5)        | 47 (3.6)      | 0.2     |
| Diverticulosis, no. (%), n=3227                    | 129 (4.0)              | 72 (3.7)        | 57 (4.4)      | 0.4     |
| Type 2 Diabetes, no. (%), n=3309                   | 125 (3.8)              | 78 (4.0)        | 47 (3.5)      | 0.6     |
| Rheumatoid arthritis, no. (%), n=3390              | 100 (2.9)              | 61 (3.0)        | 39 (2.9)      | 0.9     |
| Gout, no. (%), n=3233                              | 90 (2.8)               | 24 (1.2)        | 66 (5.1)      | <0.001  |
| Chronic fatigue syndrome, no. (%), n=3237          | 78 (2.4)               | 65 (3.4)        | 19 (1.4)      | 0.001   |
| Hyperthyroid, no. (%), n=3259                      | 78 (2.4)               | 63 (3.2)        | 15 (1.1)      | <0.001  |
| Blood clots, no. (%), n=3213                       | 70 (2.2)               | 41 (2.3)        | 29 (2.3)      | 0.9     |
| Fibromyalgia, no. (%), n=3212                      | 68 (2.1)               | 59 (3.1)        | 9 (0.7)       | <0.001  |
| Breast cancer, no. (%), n=3235                     | 63 (1.9)               | 59 (3.0)        | 4 (0.3)       | <0.001  |
| Epilepsy, no. (%), n=3230                          | 55 (1.7)               | 34 (1.8)        | 21 (1.6)      | 0.9     |
| Coronary artery disease, no. (%), n=3280           | 50 (1.5)               | 19 (1.0)        | 31 (2.3)      | 0.003   |
| Celiac disease, no. (%), n=3234                    | 45 (1.4)               | 35 (1.8)        | 10 (0.8)      | 0.02    |
| Bipolar disorder, no. (%), n=3381                  | 38 (1.1)               | 15 (0.7)        | 23 (1.7)      | 0.07    |
| Glaucoma, no. (%), n=3231                          | 38 (1.1)               | 19 (1.0)        | 16 (1.2)      | 0.6     |
| Graves disease, no. (%), n=3204                    | 32 (1.0)               | 27 (1.4)        | 5 (0.4)       | 0.008   |
| Heart attack, no. (%), n=3301                      | 31 (0.9)               | 16 (0.8)        | 15 (1.1)      | 0.5     |

<sup>a</sup>Obese defined as BMI≥30

<sup>b</sup>Evaluated in women only

<sup>b</sup>Evaluated in women only

<sup>c</sup>Evaluated in men only

|                                                             | Clinical Labs(Ques t) | Clinical Labs | Clinical Labs(Labcorp) | Proteomics or Metabolomics or Clinical Labs <sup>a</sup> | Metabolomics | Proteomics |
|-------------------------------------------------------------|-----------------------|---------------|------------------------|----------------------------------------------------------|--------------|------------|
| n Ind.                                                      | 581                   | 3553          | 3503                   | 3558                                                     | 1631         | 2162       |
| n Obs.                                                      | 783                   | 7603          | 6820                   | 7634                                                     | 2133         | 4048       |
| n Females                                                   | 307                   | 2083          | 2057                   | 2087                                                     | 968          | 1259       |
| n Males                                                     | 274                   | 1470          | 1446                   | 1471                                                     | 663          | 903        |
| MAE                                                         | 8.15                  | 8.04          | 8.03                   | 5.54                                                     | 4.81         | 4.39       |
| RMSE                                                        | 12.14                 | 12.19         | 12.19                  | 9.32                                                     | 7.48         | 6.61       |
| Pearson r of BA and CA                                      | 0.67                  | 0.7           | 0.7                    | 0.78                                                     | 0.81         | 0.88       |
| Pearson p of BA and CA <sup>b</sup>                         | 1.32E-101             | NA            | NA                     | NA                                                       | NA           | NA         |
| Pearson r of delta BA and CA                                | -0.12                 | -0.03         | -0.02                  | -0.06                                                    | -0.18        | -0.10      |
| Pearson p of delta BA and CA                                | 7.27E-04              | 2.46E-03      | 4.16E-02               | 2.03E-08                                                 | 2.63E-17     | 1.12E-09   |
| Mean SD of repeated predictions(10 x)                       | 2.3                   | 1             | 0.9                    | 3.8                                                      | 1.5          | 1          |
| SD of SD of repeated predictions(10 x)                      | 0.84                  | 0.58          | 0.32                   | 3.66                                                     | 0.44         | 0.31       |
| Mean SD of personal longitudinal predictions                | 5.27                  | 5.96          | 5.71                   | 4.53                                                     | 3.46         | 3.22       |
| SD of SD of personal longitudinal predictions               | 4.17                  | 3.87          | 3.87                   | 3.19                                                     | 2.70         | 2.17       |
| Pearson r of delta age in personal longitudinal predictions | 0.71                  | 0.67          | 0.70                   | 0.66                                                     | 0.64         | 0.67       |

|                                                      | <b>Clinical<br/>Labs(Ques<br/>t)</b> | <b>Clinical<br/>Labs</b> | <b>Clinical<br/>Labs(Labcor<br/>p)</b> | <b>Proteomics<br/>or<br/>Metabolomic<br/>s or Clinical<br/>Labs<sup>a</sup></b> | <b>Metabolomic<br/>s</b> | <b>Proteomic<br/>s</b> |
|------------------------------------------------------|--------------------------------------|--------------------------|----------------------------------------|---------------------------------------------------------------------------------|--------------------------|------------------------|
| Mean days<br>between<br>longitudinal<br>observations | 116.8                                | 190.4                    | 199.4                                  | 190.1                                                                           | 197.2                    | 166.9                  |
| Std days<br>between<br>longitudinal<br>observations  | 20.0                                 | 65.9                     | 65                                     | 65.6                                                                            | 44.1                     | 51.3                   |
| Mean delta<br>age                                    | -0.59                                | -0.43                    | -0.42                                  | -0.79                                                                           | -0.12                    | -0.73                  |
| Std dev delta<br>age                                 | 12.1                                 | 12.1                     | 12.2                                   | 9.3                                                                             | 7.5                      | 6.6                    |

a – the “Overall predictions”

b – an NA represents a p-value less than machine precision, at least  $p < 1E-200$

**Supplementary Table 3. Beta coefficients for stratified analyses by data type.**

| <b>Stratified analyses<sup>b</sup></b> | <b>β<br/>Coefficient</b> | <b>Std.<br/>error</b> | <b>95% CI</b>  | <b>Interaction p<sup>c</sup></b> |
|----------------------------------------|--------------------------|-----------------------|----------------|----------------------------------|
| <b>PROTEOMICS-DERIVED BA</b>           |                          |                       |                |                                  |
| <i>Gender</i>                          |                          |                       |                |                                  |
| Males (n=505)                          | 0.762                    | 0.255                 | 0.263, 1.26    |                                  |
| Females (n=544)                        | 0.271                    | 0.249                 | -0.216, 0.759  | 0.163                            |
| <i>Self-reported ethnicity</i>         |                          |                       |                |                                  |
| White (n=839)                          | 0.740                    | 0.188                 | 0.372, 1.107   |                                  |
| Non-white (n=145)                      | -0.509                   | 0.616                 | -1.715, 0.697  | 0.059                            |
| <i>Age at baseline, by decade</i>      |                          |                       |                |                                  |
| 18-29 years (n=67)                     | -0.239                   | 0.865                 | -1.930, 1.460  |                                  |
| 30-39 years (n=155)                    | -0.033                   | 0.519                 | -1.05, 0.985   |                                  |
| 40-49 years (n=295)                    | 0.059                    | 0.366                 | -0.658, 0.776  |                                  |
| 50-59 years (n=292)                    | 0.800                    | 0.342                 | 0.129, 1.47    |                                  |
| 60-69 years (n=182)                    | 1.12                     | 0.362                 | 0.414, 1.83    |                                  |
| 70 years and over (n=58)               | 0.849                    | 0.546                 | -0.221, 1.92   | NA                               |
| <i>Baseline BA prediction</i>          |                          |                       |                |                                  |
| BA=5 years > CA (n=227)                | -2.31                    | 0.530                 | -3.347, -1.27  |                                  |
| BA=5 years < CA (n=242)                | 3.369                    | 0.256                 | 2.87, 3.871    |                                  |
| BA=10 years > CA (n=64)                | -3.44                    | 1.037                 | -5.477, -1.41  |                                  |
| BA=10 years < CA (n=68)                | 0.97                     | 0.039                 | 0.894, 1.05    | NA                               |
| <b>METABOLOMICS-DERIVED BA</b>         |                          |                       |                |                                  |
| <i>Gender</i>                          |                          |                       |                |                                  |
| Males (n=178)                          | 0.352                    | 0.680                 | -1.009, 1.658  |                                  |
| Females (n=273)                        | 0.237                    | 0.644                 | -1.025, 1.498  | 0.883                            |
| <i>Self-reported ethnicity</i>         |                          |                       |                |                                  |
| White (n=331)                          | 0.23                     | 0.531                 | -0.81, 1.269   |                                  |
| Non-white (n=120)                      | 0.281                    | 1.003                 | -1.684, 2.25   | 0.890                            |
| <i>Age at baseline, by decade</i>      |                          |                       |                |                                  |
| 18-29 years (n=24)                     | -2.38                    | 1.4                   | -5.13, 0.37    |                                  |
| 30-39 years (n=85)                     | -0.669                   | 1.399                 | -3.41, 2.07    |                                  |
| 40-49 years (n=147)                    | 1.68                     | 0.763                 | 0.185, 3.18    |                                  |
| 50-59 years (n=140)                    | 0.678                    | 0.85                  | -0.987, 2.34   |                                  |
| 60-69 years (n=47)                     | -0.496                   | 1.07                  | -2.59, 1.59    |                                  |
| 70 years and over (n=8)                | -5.8                     | 3.19                  | -12.1, 0.459   | NA                               |
| <i>Baseline BA prediction</i>          |                          |                       |                |                                  |
| BA=5 years > CA (n=101)                | -4.782                   | 0.971                 | -6.68, -2.88   |                                  |
| BA=5 years < CA (n=113)                | 6.348                    | 0.834                 | 4.713, 7.984   |                                  |
| BA=10 years > CA (n=31)                | -8                       | 1.415                 | -10.776, -5.23 |                                  |
| BA=10 years < CA (n=46)                | 7.348                    | 0.0491                | 0.845, 1.04    | NA                               |
| <b>CHEMISTRIES-DERIVED BA</b>          |                          |                       |                |                                  |
| <i>Gender</i>                          |                          |                       |                |                                  |
| Males (n=1327)                         | 0.25                     | 0.332                 | -0.401, 0.901  |                                  |

| <b>Stratified analyses<sup>b</sup></b> | <b><math>\beta</math><br/>Coefficient</b> | <b>Std.<br/>error</b> | <b>95% CI</b>  | <b>Interaction p<sup>c</sup></b> |
|----------------------------------------|-------------------------------------------|-----------------------|----------------|----------------------------------|
| Females (n=1881)                       | -0.75                                     | 0.257                 | -1.254, -0.246 | 0.021                            |
| <i>Self-reported ethnicity</i>         |                                           |                       |                |                                  |
| White (n=2417)                         | -0.245                                    | 0.231                 | -0.697, 0.208  | 0.617                            |
| Non-white (n=692)                      | -0.657                                    | 0.516                 | -1.668, 0.355  |                                  |
| <i>Age at baseline, by decade</i>      |                                           |                       |                |                                  |
| 18-29 years (n=235)                    | -2.710                                    | 0.798                 | -4.27, -1.14   | NA                               |
| 30-39 years (n=622)                    | 0.0355                                    | 0.454                 | -0.854, 0.926  |                                  |
| 40-49 years (n=950)                    | 0.024                                     | 0.387                 | -0.734, 0.782  |                                  |
| 50-59 years (n=836)                    | 0.161                                     | 0.422                 | -0.655, 0.987  |                                  |
| 60-69 years (n=447)                    | -0.888                                    | 0.508                 | -1.880, 0.107  |                                  |
| 70 years and over (n=118)              | -0.316                                    | 0.791                 | -1.870, 1.230  |                                  |
| <i>Baseline BA prediction</i>          |                                           |                       |                |                                  |
| BA=5 years > CA (n=1007)               | -3.88                                     | 0.3855                | -4.633, -3.12  | NA                               |
| BA=5 years < CA (n=1111)               | 3.088                                     | 0.3678                | 2.287, 3.73    |                                  |
| BA=10 years > CA (n=615)               | -4.93                                     | 0.452                 | -5.82, -4.05   |                                  |
| BA=10 years < CA (n=692)               | 0.983                                     | 0.024                 | 0.936, 1.03    |                                  |

\*GEE Model: BA~time in wellness program + baseline CA; clustered by client ID, family=Gaussian, with an exchangeable correlation matrix; only individuals with at least two visits were included

bGEE Models, stratified by sex, ethnicity, age group, and baseline BA prediction:  $\Delta$ Age (BA-CA) ~ time in wellness program + baseline CA; clustered by client ID, family=Gaussian, with an exchangeable correlation matrix; All models use BA predictions based on the "All analyte" data set

cInteraction models:  $\Delta$ Age (BA-CA) ~ time in wellness program+ predictor variable + baseline CA + predictor variable x time in wellness program; clustered by client ID, family=Gaussian, with an exchangeable correlation matrix.

**Supplementary Table 4 – Coefficient estimates for all data types for each data type**

| <b>Data type</b>               | <b>Variable Name</b> | <b>Female (Mean)</b> | <b>Female (SD)</b> | <b>Male (Mean)</b> | <b>Male (SD)</b> |
|--------------------------------|----------------------|----------------------|--------------------|--------------------|------------------|
| Clinical Chemistries (Labcorp) | intercept            | 47.05                | 0.09               | 47.67              | 0.11             |
| Clinical Chemistries (Labcorp) | A/G RATIO            | -0.01                | 0.08               | -0.95              | 0.1              |
| Clinical Chemistries (Labcorp) | ADIPONECTIN, SERUM   | 4                    | 0.1                | 3.11               | 0.19             |
| Clinical Chemistries (Labcorp) | ALAT (SGPT)          | -0.02                | 0.1                | -0.16              | 0.11             |
| Clinical Chemistries (Labcorp) | ALBUMIN              | -1.95                | 0.09               | -4.14              | 0.13             |
| Clinical Chemistries (Labcorp) | ALKALINE PHOSPHATASE | 2.88                 | 0.26               | -0.3               | 0.19             |
| Clinical Chemistries (Labcorp) | ASAT (SGOT)          | 0.67                 | 0.15               | 0.6                | 0.13             |
| Clinical Chemistries (Labcorp) | BILIRUBIN, TOTAL     | 0.48                 | 0.14               | 1.51               | 0.2              |
| Clinical Chemistries (Labcorp) | BUN/CREAT RATIO      | 2.1                  | 0.09               | 1.91               | 0.11             |
| Clinical Chemistries (Labcorp) | CARBON DIOXIDE (CO2) | 2.88                 | 0.13               | 0.58               | 0.17             |
| Clinical Chemistries (Labcorp) | CHLORIDE             | -0.27                | 0.09               | 1.17               | 0.11             |
| Clinical Chemistries (Labcorp) | CHOLESTEROL, TOTAL   | 1.92                 | 0.07               | 0.61               | 0.07             |
| Clinical Chemistries (Labcorp) | CREATININE ENZ, SER  | 0.1                  | 0.13               | 1.06               | 0.18             |
| Clinical Chemistries (Labcorp) | CRP HIGH SENSITIVITY | -0.23                | 0.18               | 0.73               | 0.23             |
| Clinical Chemistries (Labcorp) | EOSINOPHILS          | 0.58                 | 0.07               | 0.35               | 0.08             |
| Clinical Chemistries (Labcorp) | EOSINOPHILS ABSOLUTE | 0.15                 | 0.07               | 0.53               | 0.07             |
| Clinical Chemistries (Labcorp) | GGT                  | 0.25                 | 0.17               | 0.27               | 0.14             |

| <b>Data type</b>               | <b>Variable Name</b> | <b>Female (Mean)</b> | <b>Female (SD)</b> | <b>Male (Mean)</b> | <b>Male (SD)</b> |
|--------------------------------|----------------------|----------------------|--------------------|--------------------|------------------|
| Clinical Chemistries (Labcorp) | GLOBULIN             | -0.8                 | 0.06               | -0.72              | 0.09             |
| Clinical Chemistries (Labcorp) | GLUCOSE              | 2.77                 | 0.1                | 3.91               | 0.15             |
| Clinical Chemistries (Labcorp) | GLYCOHEMOGLOBIN A1C  | 3.91                 | 0.12               | 3.69               | 0.14             |
| Clinical Chemistries (Labcorp) | HDL CHOL DIRECT      | 1.6                  | 0.07               | 1.04               | 0.08             |
| Clinical Chemistries (Labcorp) | HDL PARTICLE NUMBER  | 1.24                 | 0.1                | 1.07               | 0.14             |
| Clinical Chemistries (Labcorp) | HEMATOCRIT           | 0.2                  | 0.07               | 0.02               | 0.08             |
| Clinical Chemistries (Labcorp) | HEMOGLOBIN           | 0.35                 | 0.06               | -0.07              | 0.07             |
| Clinical Chemistries (Labcorp) | HOMA-IR              | -0.58                | 0.09               | 0.22               | 0.13             |
| Clinical Chemistries (Labcorp) | HOMOCYSTEINE, SERUM  | 2.37                 | 0.24               | 2.13               | 0.17             |
| Clinical Chemistries (Labcorp) | INSULIN              | -1.16                | 0.1                | -0.55              | 0.14             |
| Clinical Chemistries (Labcorp) | LDL PARTICLE NUMBER  | 0.94                 | 0.06               | 0.66               | 0.07             |
| Clinical Chemistries (Labcorp) | LDL SMALL            | 0.62                 | 0.07               | 1.04               | 0.08             |
| Clinical Chemistries (Labcorp) | LDL-CHOL CALCULATION | 1.04                 | 0.07               | 0.01               | 0.08             |
| Clinical Chemistries (Labcorp) | LDL_SIZE             | -0.74                | 0.13               | -1.47              | 0.12             |
| Clinical Chemistries (Labcorp) | LPIR_SCORE           | 0.06                 | 0.06               | -0.08              | 0.06             |
| Clinical Chemistries (Labcorp) | LYMPHOCYTES          | -1.11                | 0.07               | -1.73              | 0.09             |
| Clinical Chemistries (Labcorp) | LYMPHOCYTES ABSOLUTE | -1.61                | 0.07               | -1.41              | 0.1              |

| <b>Data type</b>               | <b>Variable Name</b>    | <b>Female (Mean)</b> | <b>Female (SD)</b> | <b>Male (Mean)</b> | <b>Male (SD)</b> |
|--------------------------------|-------------------------|----------------------|--------------------|--------------------|------------------|
| Clinical Chemistries (Labcorp) | MCH                     | 1.01                 | 0.08               | 1.55               | 0.09             |
| Clinical Chemistries (Labcorp) | MCHC                    | 0.51                 | 0.13               | -0.32              | 0.15             |
| Clinical Chemistries (Labcorp) | MCV                     | 0.95                 | 0.09               | 1.83               | 0.1              |
| Clinical Chemistries (Labcorp) | MERCURY, BLOOD          | 1.34                 | 0.21               | 2.06               | 0.21             |
| Clinical Chemistries (Labcorp) | MONOCYTES               | 1.57                 | 0.09               | 0.96               | 0.1              |
| Clinical Chemistries (Labcorp) | MONOCYTES ABSOLUTE      | 0.55                 | 0.07               | 0.71               | 0.1              |
| Clinical Chemistries (Labcorp) | OXLDL                   | 0.91                 | 0.09               | 0.19               | 0.09             |
| Clinical Chemistries (Labcorp) | PLATELET COUNT THOUSAND | -1.03                | 0.16               | -1.24              | 0.25             |
| Clinical Chemistries (Labcorp) | PROTEIN, TOTAL SERUM    | -1.97                | 0.07               | -3.24              | 0.11             |
| Clinical Chemistries (Labcorp) | RDW                     | 1.16                 | 0.1                | 1.89               | 0.19             |
| Clinical Chemistries (Labcorp) | RED CELL COUNT          | -0.54                | 0.06               | -1.21              | 0.07             |
| Clinical Chemistries (Labcorp) | SODIUM                  | 1.75                 | 0.1                | 0.56               | 0.14             |
| Clinical Chemistries (Labcorp) | TOTAL NEUTROPHILS       | 0.49                 | 0.07               | 1.29               | 0.08             |
| Clinical Chemistries (Labcorp) | TOTAL NEUTROPHILS AB    | -0.41                | 0.06               | 0.6                | 0.08             |
| Clinical Chemistries (Labcorp) | TRIGLYCERIDES           | 0.67                 | 0.11               | 0.55               | 0.09             |
| Clinical Chemistries (Labcorp) | Triglyceride HDL Ratio  | 0.12                 | 0.09               | 0.18               | 0.08             |
| Clinical Chemistries (Labcorp) | UREA NITROGEN           | 2.15                 | 0.09               | 2.47               | 0.1              |



| <b>Data type</b>               | <b>Variable Name</b> | <b>Female (Mean)</b> | <b>Female (SD)</b> | <b>Male (Mean)</b> | <b>Male (SD)</b> |
|--------------------------------|----------------------|----------------------|--------------------|--------------------|------------------|
| Clinical Chemistries (Labcorp) | URIC ACID            | -0.16                | 0.14               | -1.75              | 0.19             |
| Clinical Chemistries (Labcorp) | V1                   | -0.66                | 0.18               | -1.27              | 0.15             |
| Clinical Chemistries (Labcorp) | V2                   | 0.31                 | 0.13               | -0.25              | 0.13             |
| Clinical Chemistries (Labcorp) | V3                   | 0.1                  | 0.1                | -0.49              | 0.11             |
| Clinical Chemistries (Labcorp) | V4                   | -0.35                | 0.13               | -0.52              | 0.18             |
| Clinical Chemistries (Labcorp) | V5                   | -0.69                | 0.18               | 0.07               | 0.19             |
| Clinical Chemistries (Labcorp) | V6                   | 0.35                 | 0.13               | 0.56               | 0.17             |
| Clinical Chemistries (Labcorp) | V7                   | 0.04                 | 0.13               | 0.2                | 0.15             |
| Clinical Chemistries (Labcorp) | WHITE CELL COUNT     | -0.79                | 0.06               | 0.07               | 0.09             |
| Clinical Chemistries (Labcorp) | diastolic            | 0.98                 | 0.1                | 0.65               | 0.11             |
| Clinical Chemistries (Labcorp) | systolic             | 2.1                  | 0.08               | 1.78               | 0.11             |
| Clinical Chemistries (Quest)   | intercept            | 51.46                | 0.19               | 52.24              | 0.26             |
| Clinical Chemistries (Quest)   | A/G RATIO            | -0.32                | 0.21               | -1.46              | 0.23             |
| Clinical Chemistries (Quest)   | ADIPONECTIN, SERUM   | 2.35                 | 0.36               | 3.02               | 0.43             |
| Clinical Chemistries (Quest)   | ALAT (SGPT)          | 0.36                 | 0.16               | -0.61              | 0.23             |
| Clinical Chemistries (Quest)   | ALBUMIN              | -1.46                | 0.23               | -4.82              | 0.27             |
| Clinical Chemistries (Quest)   | ALKALINE PHOSPHATASE | 2.14                 | 0.34               | 1.01               | 0.42             |

| <b>Data type</b>             | <b>Variable Name</b> | <b>Female (Mean)</b> | <b>Female (SD)</b> | <b>Male (Mean)</b> | <b>Male (SD)</b> |
|------------------------------|----------------------|----------------------|--------------------|--------------------|------------------|
| Clinical Chemistries (Quest) | ARSENIC, BLOOD       | 0.35                 | 0.21               | 1.45               | 0.49             |
| Clinical Chemistries (Quest) | ASAT (SGOT)          | 0.88                 | 0.21               | 0.35               | 0.27             |
| Clinical Chemistries (Quest) | BILIRUBIN, DIRECT    | -0.76                | 0.2                | 0.33               | 0.25             |
| Clinical Chemistries (Quest) | BILIRUBIN, INDIRECT  | 0.46                 | 0.16               | 0.27               | 0.22             |
| Clinical Chemistries (Quest) | BILIRUBIN, TOTAL     | 0.19                 | 0.13               | 0.31               | 0.2              |
| Clinical Chemistries (Quest) | BUN/CREAT RATIO      | 2.05                 | 0.16               | 2.04               | 0.26             |
| Clinical Chemistries (Quest) | CARBON DIOXIDE (CO2) | 1                    | 0.3                | 0.42               | 0.39             |
| Clinical Chemistries (Quest) | CHLORIDE             | -0.64                | 0.17               | 1.49               | 0.27             |
| Clinical Chemistries (Quest) | CHOLESTEROL, TOTAL   | 1.33                 | 0.17               | 0.28               | 0.28             |
| Clinical Chemistries (Quest) | CREATININE ENZ, SER  | -0.69                | 0.31               | 0.27               | 0.32             |
| Clinical Chemistries (Quest) | CRP HIGH SENSITIVITY | -0.28                | 0.36               | 1.63               | 0.51             |
| Clinical Chemistries (Quest) | EOSINOPHILS          | 0.61                 | 0.15               | 0.92               | 0.2              |
| Clinical Chemistries (Quest) | EOSINOPHILS ABSOLUTE | 0.4                  | 0.14               | 0.9                | 0.19             |
| Clinical Chemistries (Quest) | GGT                  | 0.45                 | 0.24               | -0.47              | 0.37             |
| Clinical Chemistries (Quest) | GLOBULIN             | -0.45                | 0.16               | -0.46              | 0.22             |
| Clinical Chemistries (Quest) | GLUCOSE              | 1.72                 | 0.27               | 1.91               | 0.36             |
| Clinical Chemistries (Quest) | GLUTATHIONE, TOTAL   | 0.51                 | 0.41               | 0.27               | 0.42             |

| <b>Data type</b>             | <b>Variable Name</b> | <b>Female (Mean)</b> | <b>Female (SD)</b> | <b>Male (Mean)</b> | <b>Male (SD)</b> |
|------------------------------|----------------------|----------------------|--------------------|--------------------|------------------|
| Clinical Chemistries (Quest) | GLYCOHEMOGLOBIN A1C  | 2.61                 | 0.27               | 3.47               | 0.36             |
| Clinical Chemistries (Quest) | HDL CHOL DIRECT      | 0.96                 | 0.18               | 0.2                | 0.22             |
| Clinical Chemistries (Quest) | HDL LARGE            | -0.04                | 0.27               | -0.86              | 0.47             |
| Clinical Chemistries (Quest) | HEMATOCRIT           | 0.32                 | 0.14               | 0.08               | 0.19             |
| Clinical Chemistries (Quest) | HEMOGLOBIN           | 0.64                 | 0.15               | 0.21               | 0.22             |
| Clinical Chemistries (Quest) | HOMA-IR              | 0.17                 | 0.15               | 0.37               | 0.16             |
| Clinical Chemistries (Quest) | HOMOCYSTEINE, SERUM  | 2.06                 | 0.34               | 0.72               | 0.39             |
| Clinical Chemistries (Quest) | IL-8                 | 1.62                 | 0.29               | 1.39               | 0.47             |
| Clinical Chemistries (Quest) | INSULIN              | -0.1                 | 0.17               | -0.24              | 0.24             |
| Clinical Chemistries (Quest) | LACTIC DEHYDROGENASE | 1.25                 | 0.28               | 2.08               | 0.4              |
| Clinical Chemistries (Quest) | LDL MEDIUM           | -0.78                | 0.16               | -0.39              | 0.31             |
| Clinical Chemistries (Quest) | LDL PARTICLE NUMBER  | -0.33                | 0.2                | -0.25              | 0.19             |
| Clinical Chemistries (Quest) | LDL PEAK SIZE        | -0.01                | 0.18               | 0.51               | 0.21             |
| Clinical Chemistries (Quest) | LDL SMALL            | -0.17                | 0.18               | 0.03               | 0.23             |
| Clinical Chemistries (Quest) | LDL-CHOL CALCULATION | 0.68                 | 0.17               | 0.17               | 0.27             |
| Clinical Chemistries (Quest) | LEAD, BLOOD          | 3.67                 | 0.37               | 3.82               | 0.45             |
| Clinical Chemistries (Quest) | LYMPHOCYTES          | -0.55                | 0.12               | -0.5               | 0.15             |

| <b>Data type</b>             | <b>Variable Name</b>    | <b>Female (Mean)</b> | <b>Female (SD)</b> | <b>Male (Mean)</b> | <b>Male (SD)</b> |
|------------------------------|-------------------------|----------------------|--------------------|--------------------|------------------|
| Clinical Chemistries (Quest) | LYMPHOCYTES ABSOLUTE    | -0.99                | 0.15               | -0.6               | 0.19             |
| Clinical Chemistries (Quest) | MCH                     | 0.58                 | 0.16               | 0.95               | 0.24             |
| Clinical Chemistries (Quest) | MCHC                    | 1.24                 | 0.24               | 0.74               | 0.36             |
| Clinical Chemistries (Quest) | MCV                     | 0.22                 | 0.18               | 0.86               | 0.27             |
| Clinical Chemistries (Quest) | MERCURY, BLOOD          | -0.03                | 0.21               | 1.61               | 0.31             |
| Clinical Chemistries (Quest) | MONOCYTES               | 1.25                 | 0.16               | -0.1               | 0.26             |
| Clinical Chemistries (Quest) | MONOCYTES ABSOLUTE      | 0.92                 | 0.16               | -0.21              | 0.25             |
| Clinical Chemistries (Quest) | MPV                     | -0.47                | 0.22               | -0.3               | 0.36             |
| Clinical Chemistries (Quest) | NEUTROPHIL, SEGS        | 0.1                  | 0.1                | 0.17               | 0.12             |
| Clinical Chemistries (Quest) | NEUTROPHILS ABSOLUTE    | -0.16                | 0.09               | 0.02               | 0.12             |
| Clinical Chemistries (Quest) | PAI-1 ANTIGEN, QNT      | -0.87                | 0.29               | -0.23              | 0.3              |
| Clinical Chemistries (Quest) | PLATELET COUNT          | -0.91                | 0.13               | -0.48              | 0.2              |
| Clinical Chemistries (Quest) | PLATELET COUNT THOUSAND | -0.91                | 0.13               | -0.48              | 0.2              |
| Clinical Chemistries (Quest) | PROTEIN, TOTAL SERUM    | -1.26                | 0.16               | -3.4               | 0.24             |
| Clinical Chemistries (Quest) | QUICKI                  | 0.07                 | 0.16               | -0.09              | 0.2              |
| Clinical Chemistries (Quest) | RDW                     | -0.6                 | 0.24               | 1.39               | 0.4              |
| Clinical Chemistries (Quest) | RED CELL COUNT          | -0.11                | 0.13               | -0.81              | 0.21             |

| <b>Data type</b>             | <b>Variable Name</b>   | <b>Female (Mean)</b> | <b>Female (SD)</b> | <b>Male (Mean)</b> | <b>Male (SD)</b> |
|------------------------------|------------------------|----------------------|--------------------|--------------------|------------------|
| Clinical Chemistries (Quest) | SODIUM                 | 1.31                 | 0.22               | 0.44               | 0.33             |
| Clinical Chemistries (Quest) | TNF-ALPHA              | 1.14                 | 0.24               | -1.48              | 0.49             |
| Clinical Chemistries (Quest) | TOTAL NEUTROPHILS      | 0.1                  | 0.1                | 0.17               | 0.12             |
| Clinical Chemistries (Quest) | TOTAL NEUTROPHILS AB   | -0.16                | 0.09               | 0.02               | 0.12             |
| Clinical Chemistries (Quest) | TRIGLYCERIDES          | 0.85                 | 0.31               | 0.04               | 0.27             |
| Clinical Chemistries (Quest) | Triglyceride HDL Ratio | 0.29                 | 0.18               | -0.11              | 0.2              |
| Clinical Chemistries (Quest) | UREA NITROGEN          | 1.56                 | 0.16               | 2.01               | 0.21             |
| Clinical Chemistries (Quest) | URIC ACID              | 0.73                 | 0.32               | -0.26              | 0.29             |
| Clinical Chemistries (Quest) | V1                     | -0.85                | 0.23               | -1.77              | 0.29             |
| Clinical Chemistries (Quest) | V2                     | 0.29                 | 0.15               | 0.18               | 0.2              |
| Clinical Chemistries (Quest) | V3                     | 0.28                 | 0.15               | -0.33              | 0.22             |
| Clinical Chemistries (Quest) | V4                     | -0.16                | 0.12               | -0.56              | 0.23             |
| Clinical Chemistries (Quest) | V5                     | -0.08                | 0.27               | -0.66              | 0.49             |
| Clinical Chemistries (Quest) | V6                     | 0.36                 | 0.31               | -0.62              | 0.36             |
| Clinical Chemistries (Quest) | V7                     | -0.43                | 0.35               | 1.21               | 0.36             |
| Clinical Chemistries (Quest) | WHITE CELL COUNT       | -0.38                | 0.1                | 0                  | 0.16             |
| Clinical Chemistries (Quest) | diastolic              | 0.83                 | 0.25               | -0.39              | 0.33             |

| <b>Data type</b>                   | <b>Variable Name</b> | <b>Female<br/>(Mean)</b> | <b>Female<br/>(SD)</b> | <b>Male<br/>(Mean)</b> | <b>Male<br/>(SD)</b> |
|------------------------------------|----------------------|--------------------------|------------------------|------------------------|----------------------|
| Clinical<br>Chemistries<br>(Quest) | systolic             | 1.2                      | 0.2                    | 2                      | 0.26                 |
| Proteins                           | intercept            | 47.99                    | 0.1                    | 47.26                  | 0.13                 |
| Proteins                           | CVD2_O00182          | 0.3                      | 0.06                   | -0.07                  | 0.09                 |
| Proteins                           | CVD2_O00220          | -0.22                    | 0.08                   | 0.12                   | 0.1                  |
| Proteins                           | CVD2_O00253          | -2.08                    | 0.08                   | -1.63                  | 0.11                 |
| Proteins                           | CVD2_O14763          | 0.41                     | 0.07                   | 0.41                   | 0.09                 |
| Proteins                           | CVD2_O14836          | 0.15                     | 0.1                    | 0.49                   | 0.1                  |
| Proteins                           | CVD2_O43915          | 0.02                     | 0.09                   | 0.56                   | 0.12                 |
| Proteins                           | CVD2_O94907          | -0.02                    | 0.03                   | -0.07                  | 0.04                 |
| Proteins                           | CVD2_P00797          | -0.37                    | 0.07                   | 0.11                   | 0.1                  |
| Proteins                           | CVD2_P01127          | -0.34                    | 0.04                   | -0.16                  | 0.05                 |
| Proteins                           | CVD2_P01241          | -0.14                    | 0.09                   | 0.27                   | 0.12                 |
| Proteins                           | CVD2_P01730          | -0.2                     | 0.1                    | -0.32                  | 0.13                 |
| Proteins                           | CVD2_P01833          | 0.78                     | 0.09                   | 1.11                   | 0.11                 |
| Proteins                           | CVD2_P02760          | 0.45                     | 0.08                   | -0.03                  | 0.08                 |
| Proteins                           | CVD2_P04179          | -0.67                    | 0.06                   | -0.92                  | 0.09                 |
| Proteins                           | CVD2_P04792          | 0.22                     | 0.08                   | -0.29                  | 0.09                 |
| Proteins                           | CVD2_P05231          | -0.11                    | 0.06                   | 0                      | 0.06                 |
| Proteins                           | CVD2_P06858          | 0.05                     | 0.1                    | 0.24                   | 0.1                  |
| Proteins                           | CVD2_P07204          | 0.06                     | 0.06                   | -0.14                  | 0.07                 |
| Proteins                           | CVD2_P07585          | 0.61                     | 0.06                   | 0.68                   | 0.08                 |
| Proteins                           | CVD2_P07711          | -0.02                    | 0.09                   | 0.61                   | 0.11                 |
| Proteins                           | CVD2_P09237          | 0.31                     | 0.09                   | 0.31                   | 0.1                  |
| Proteins                           | CVD2_P09341          | -0.19                    | 0.06                   | 0.06                   | 0.05                 |
| Proteins                           | CVD2_P09601          | 0.25                     | 0.1                    | -0.07                  | 0.11                 |
| Proteins                           | CVD2_P10147          | 0.16                     | 0.05                   | 0.25                   | 0.06                 |
| Proteins                           | CVD2_P12104          | -0.32                    | 0.07                   | -0.52                  | 0.1                  |
| Proteins                           | CVD2_P12931          | -0.38                    | 0.07                   | -0.1                   | 0.06                 |
| Proteins                           | CVD2_P13726          | 0.77                     | 0.05                   | 0.54                   | 0.06                 |
| Proteins                           | CVD2_P18510          | -0.67                    | 0.08                   | -0.67                  | 0.07                 |
| Proteins                           | CVD2_P19883          | 0.26                     | 0.09                   | 0.18                   | 0.11                 |
| Proteins                           | CVD2_P21583          | -0.03                    | 0.06                   | 0.29                   | 0.06                 |
| Proteins                           | CVD2_P21980          | 0.11                     | 0.07                   | 0.52                   | 0.09                 |
| Proteins                           | CVD2_P22004          | 0.02                     | 0.08                   | 0.03                   | 0.08                 |
| Proteins                           | CVD2_P25116          | 0.1                      | 0.05                   | -0.17                  | 0.05                 |
| Proteins                           | CVD2_P26022          | -0.07                    | 0.09                   | -0.21                  | 0.11                 |
| Proteins                           | CVD2_P27352          | 0.32                     | 0.1                    | 0.04                   | 0.1                  |
| Proteins                           | CVD2_P29965          | 0.02                     | 0.04                   | -0.01                  | 0.04                 |
| Proteins                           | CVD2_P31994          | -0.45                    | 0.09                   | 0.19                   | 0.08                 |
| Proteins                           | CVD2_P31997          | -0.07                    | 0.09                   | -0.16                  | 0.1                  |
| Proteins                           | CVD2_P35318          | 0.33                     | 0.06                   | 0.73                   | 0.07                 |

| <b>Data type</b> | <b>Variable Name</b> | <b>Female<br/>(Mean)</b> | <b>Female<br/>(SD)</b> | <b>Male<br/>(Mean)</b> | <b>Male<br/>(SD)</b> |
|------------------|----------------------|--------------------------|------------------------|------------------------|----------------------|
| Proteins         | CVD2_P35442          | -0.8                     | 0.09                   | -0.42                  | 0.11                 |
| Proteins         | CVD2_P35475          | -0.31                    | 0.07                   | 0.12                   | 0.1                  |
| Proteins         | CVD2_P39900          | 0.62                     | 0.09                   | 0.55                   | 0.11                 |
| Proteins         | CVD2_P40225          | -0.05                    | 0.06                   | -0.26                  | 0.08                 |
| Proteins         | CVD2_P41159          | -0.36                    | 0.06                   | -0.07                  | 0.06                 |
| Proteins         | CVD2_P47992          | -0.45                    | 0.1                    | -0.37                  | 0.11                 |
| Proteins         | CVD2_P49763          | 0.41                     | 0.07                   | 0.53                   | 0.08                 |
| Proteins         | CVD2_P51161          | -0.17                    | 0.09                   | 0.18                   | 0.12                 |
| Proteins         | CVD2_P51888          | 1.48                     | 0.09                   | 0.95                   | 0.1                  |
| Proteins         | CVD2_P78380          | 0.6                      | 0.06                   | 0.05                   | 0.07                 |
| Proteins         | CVD2_Q02763          | -0.51                    | 0.1                    | -0.68                  | 0.11                 |
| Proteins         | CVD2_Q04760          | -0.47                    | 0.09                   | 0.2                    | 0.08                 |
| Proteins         | CVD2_Q12866          | 0.13                     | 0.08                   | 0.77                   | 0.11                 |
| Proteins         | CVD2_Q13043          | -0.04                    | 0.05                   | 0.26                   | 0.06                 |
| Proteins         | CVD2_Q13219          | 0.31                     | 0.09                   | 0.41                   | 0.12                 |
| Proteins         | CVD2_Q14005          | 0.65                     | 0.09                   | -0.28                  | 0.11                 |
| Proteins         | CVD2_Q14116          | -0.18                    | 0.06                   | 0.23                   | 0.07                 |
| Proteins         | CVD2_Q14242          | -0.13                    | 0.08                   | -0.48                  | 0.12                 |
| Proteins         | CVD2_Q15109          | -0.78                    | 0.1                    | -0.86                  | 0.11                 |
| Proteins         | CVD2_Q15389          | -0.13                    | 0.04                   | -0.02                  | 0.06                 |
| Proteins         | CVD2_Q16651          | -0.44                    | 0.09                   | -0.08                  | 0.1                  |
| Proteins         | CVD2_Q16698          | -0.11                    | 0.04                   | 0.01                   | 0.05                 |
| Proteins         | CVD2_Q76LX8          | -0.73                    | 0.09                   | -0.26                  | 0.1                  |
| Proteins         | CVD2_Q8IW75          | 0.08                     | 0.08                   | 0.33                   | 0.1                  |
| Proteins         | CVD2_Q8IYS5          | -0.5                     | 0.1                    | -0.21                  | 0.1                  |
| Proteins         | CVD2_Q8NEV9_Q14213   | -0.05                    | 0.11                   | 0.35                   | 0.12                 |
| Proteins         | CVD2_Q8TAD2          | 0.94                     | 0.09                   | 1.44                   | 0.13                 |
| Proteins         | CVD2_Q92583          | -0.16                    | 0.11                   | -0.51                  | 0.1                  |
| Proteins         | CVD2_Q96D42          | 1.84                     | 0.1                    | 1.67                   | 0.1                  |
| Proteins         | CVD2_Q96IQ7          | 0.22                     | 0.11                   | 0.05                   | 0.12                 |
| Proteins         | CVD2_Q99075          | -0.11                    | 0.05                   | -0.2                   | 0.06                 |
| Proteins         | CVD2_Q99523          | 0.24                     | 0.06                   | 0.29                   | 0.08                 |
| Proteins         | CVD2_Q99895          | -0.33                    | 0.1                    | -0.2                   | 0.1                  |
| Proteins         | CVD2_Q9BQ51          | -0.28                    | 0.1                    | -0.15                  | 0.1                  |
| Proteins         | CVD2_Q9BQR3          | -0.31                    | 0.1                    | -0.65                  | 0.1                  |
| Proteins         | CVD2_Q9BUD6          | -0.98                    | 0.08                   | 0.14                   | 0.08                 |
| Proteins         | CVD2_Q9BWV1          | -1.27                    | 0.08                   | -1.13                  | 0.09                 |
| Proteins         | CVD2_Q9BYF1          | 0.14                     | 0.08                   | -0.05                  | 0.09                 |
| Proteins         | CVD2_Q9GZV9          | -0.09                    | 0.05                   | -0.06                  | 0.06                 |
| Proteins         | CVD2_Q9HB29          | 0.74                     | 0.1                    | 0.09                   | 0.11                 |
| Proteins         | CVD2_Q9NSA1          | 0.26                     | 0.05                   | 0.11                   | 0.05                 |
| Proteins         | CVD2_Q9UEW3          | 0.57                     | 0.08                   | -0.35                  | 0.12                 |
| Proteins         | CVD2_Q9UIB8          | -0.12                    | 0.06                   | -0.13                  | 0.06                 |

| <b>Data type</b> | <b>Variable Name</b> | <b>Female<br/>(Mean)</b> | <b>Female<br/>(SD)</b> | <b>Male<br/>(Mean)</b> | <b>Male<br/>(SD)</b> |
|------------------|----------------------|--------------------------|------------------------|------------------------|----------------------|
| Proteins         | CVD2_Q9UJM8          | 0.09                     | 0.08                   | -0.41                  | 0.12                 |
| Proteins         | CVD2_Q9UK05          | -0.06                    | 0.07                   | -0.09                  | 0.08                 |
| Proteins         | CVD2_Q9UKP3          | -0.06                    | 0.04                   | 0.28                   | 0.06                 |
| Proteins         | CVD2_Q9Y6K9          | 0.11                     | 0.04                   | 0.28                   | 0.04                 |
| Proteins         | CVD2_Q9Y6Q6          | -0.16                    | 0.07                   | -0.27                  | 0.08                 |
| Proteins         | CVD3_O00175          | 0.05                     | 0.08                   | -0.05                  | 0.1                  |
| Proteins         | CVD3_O00300          | 0.2                      | 0.06                   | 0.38                   | 0.06                 |
| Proteins         | CVD3_O14798          | 0.31                     | 0.1                    | 0.43                   | 0.1                  |
| Proteins         | CVD3_O15467          | -0.21                    | 0.1                    | 0.25                   | 0.11                 |
| Proteins         | CVD3_O75594          | -0.25                    | 0.11                   | -0.01                  | 0.08                 |
| Proteins         | CVD3_O95998          | 0.42                     | 0.05                   | 0.13                   | 0.05                 |
| Proteins         | CVD3_P00533          | -0.4                     | 0.07                   | -0.67                  | 0.07                 |
| Proteins         | CVD3_P00749          | -0.33                    | 0.07                   | -0.28                  | 0.07                 |
| Proteins         | CVD3_P00750          | 0.4                      | 0.1                    | 0.24                   | 0.09                 |
| Proteins         | CVD3_P01130          | 0.51                     | 0.09                   | -0.04                  | 0.1                  |
| Proteins         | CVD3_P02144          | 0.78                     | 0.1                    | 0.79                   | 0.1                  |
| Proteins         | CVD3_P02452          | -0.42                    | 0.08                   | -1.3                   | 0.09                 |
| Proteins         | CVD3_P02786          | -0.42                    | 0.08                   | -0.03                  | 0.12                 |
| Proteins         | CVD3_P04080          | 0.22                     | 0.07                   | 0.25                   | 0.08                 |
| Proteins         | CVD3_P04085          | -0.26                    | 0.04                   | -0.04                  | 0.04                 |
| Proteins         | CVD3_P04275          | 0.01                     | 0.1                    | 0.11                   | 0.1                  |
| Proteins         | CVD3_P05107          | -0.06                    | 0.08                   | 0.17                   | 0.11                 |
| Proteins         | CVD3_P05121          | -0.25                    | 0.05                   | -0.14                  | 0.06                 |
| Proteins         | CVD3_P05164          | -0.56                    | 0.09                   | -0.27                  | 0.08                 |
| Proteins         | CVD3_P07339          | 0.36                     | 0.08                   | -0.05                  | 0.09                 |
| Proteins         | CVD3_P08253          | -0.05                    | 0.05                   | 0.47                   | 0.07                 |
| Proteins         | CVD3_P08254          | 0.02                     | 0.08                   | -0.22                  | 0.08                 |
| Proteins         | CVD3_P08833          | 0.05                     | 0.08                   | 0.25                   | 0.08                 |
| Proteins         | CVD3_P08887          | 0.32                     | 0.09                   | 0.5                    | 0.12                 |
| Proteins         | CVD3_P10451          | 0.04                     | 0.09                   | -0.25                  | 0.08                 |
| Proteins         | CVD3_P10646          | 0.63                     | 0.08                   | -0.03                  | 0.12                 |
| Proteins         | CVD3_P13500          | -0.26                    | 0.07                   | -0.25                  | 0.07                 |
| Proteins         | CVD3_P13598          | -0.21                    | 0.06                   | 0.42                   | 0.08                 |
| Proteins         | CVD3_P13686          | 0.12                     | 0.09                   | -0.59                  | 0.1                  |
| Proteins         | CVD3_P14778          | 0.24                     | 0.09                   | 0.49                   | 0.08                 |
| Proteins         | CVD3_P14780          | -0.2                     | 0.06                   | 0.22                   | 0.08                 |
| Proteins         | CVD3_P15085          | 0.21                     | 0.05                   | 0.09                   | 0.06                 |
| Proteins         | CVD3_P15086          | 0.27                     | 0.05                   | 0.27                   | 0.06                 |
| Proteins         | CVD3_P15090          | 0.38                     | 0.04                   | -0.35                  | 0.08                 |
| Proteins         | CVD3_P15144          | -0.59                    | 0.08                   | -0.81                  | 0.08                 |
| Proteins         | CVD3_P16109          | -0.08                    | 0.05                   | 0                      | 0.05                 |
| Proteins         | CVD3_P16284          | -0.06                    | 0.06                   | 0.03                   | 0.06                 |
| Proteins         | CVD3_P16422          | 0.31                     | 0.07                   | 0.2                    | 0.1                  |



| <b>Data type</b> | <b>Variable Name</b> | <b>Female<br/>(Mean)</b> | <b>Female<br/>(SD)</b> | <b>Male<br/>(Mean)</b> | <b>Male<br/>(SD)</b> |
|------------------|----------------------|--------------------------|------------------------|------------------------|----------------------|
| Proteins         | CVD3_P16581          | -0.18                    | 0.08                   | -0.53                  | 0.08                 |
| Proteins         | CVD3_P17931          | 0.13                     | 0.08                   | -0.04                  | 0.1                  |
| Proteins         | CVD3_P18065          | 1.08                     | 0.06                   | 0.89                   | 0.06                 |
| Proteins         | CVD3_P19438          | 0.13                     | 0.04                   | 0.14                   | 0.05                 |
| Proteins         | CVD3_P19957          | -0.73                    | 0.08                   | -0.39                  | 0.12                 |
| Proteins         | CVD3_P20160          | 0.02                     | 0.08                   | 0.11                   | 0.1                  |
| Proteins         | CVD3_P20333          | -0.06                    | 0.04                   | -0.12                  | 0.04                 |
| Proteins         | CVD3_P24158          | -0.18                    | 0.07                   | -0.11                  | 0.08                 |
| Proteins         | CVD3_P25445          | 0.39                     | 0.07                   | 0.29                   | 0.08                 |
| Proteins         | CVD3_P27930          | -0.67                    | 0.1                    | -0.93                  | 0.11                 |
| Proteins         | CVD3_P28799          | -0.18                    | 0.09                   | -0.36                  | 0.1                  |
| Proteins         | CVD3_P30530          | -0.38                    | 0.06                   | -0.86                  | 0.07                 |
| Proteins         | CVD3_P33151          | -0.43                    | 0.06                   | -0.36                  | 0.07                 |
| Proteins         | CVD3_P35247          | 0.12                     | 0.08                   | -0.24                  | 0.1                  |
| Proteins         | CVD3_P36222          | 0.68                     | 0.09                   | 0.67                   | 0.13                 |
| Proteins         | CVD3_P36941          | -0.31                    | 0.05                   | -0.02                  | 0.06                 |
| Proteins         | CVD3_P42574          | 0.07                     | 0.03                   | 0.11                   | 0.03                 |
| Proteins         | CVD3_P54760          | -0.44                    | 0.07                   | 0.07                   | 0.07                 |
| Proteins         | CVD3_P56470          | 0.05                     | 0.06                   | -0.06                  | 0.1                  |
| Proteins         | CVD3_P78324          | 0.16                     | 0.1                    | 0.01                   | 0.13                 |
| Proteins         | CVD3_P80370          | 0.79                     | 0.12                   | 0.58                   | 0.1                  |
| Proteins         | CVD3_P98160          | -0.43                    | 0.05                   | -0.13                  | 0.07                 |
| Proteins         | CVD3_Q01638          | -0.47                    | 0.11                   | -0.5                   | 0.11                 |
| Proteins         | CVD3_Q03405          | 0.12                     | 0.05                   | 0.4                    | 0.06                 |
| Proteins         | CVD3_Q07654          | -0.5                     | 0.06                   | 0.61                   | 0.08                 |
| Proteins         | CVD3_Q12860          | 0.21                     | 0.07                   | 0.16                   | 0.08                 |
| Proteins         | CVD3_Q13231          | 0.37                     | 0.08                   | 1.11                   | 0.12                 |
| Proteins         | CVD3_Q13740          | 0.05                     | 0.05                   | 0.16                   | 0.06                 |
| Proteins         | CVD3_Q13867          | -0.18                    | 0.07                   | -0.16                  | 0.08                 |
| Proteins         | CVD3_Q15166          | 0.13                     | 0.08                   | -0.23                  | 0.1                  |
| Proteins         | CVD3_Q16270          | 0.38                     | 0.06                   | 0.33                   | 0.06                 |
| Proteins         | CVD3_Q16663          | -0.38                    | 0.1                    | -0.19                  | 0.11                 |
| Proteins         | CVD3_Q5T2D2          | -0.32                    | 0.07                   | -0.02                  | 0.08                 |
| Proteins         | CVD3_Q86VB7          | 0.23                     | 0.09                   | 0.08                   | 0.08                 |
| Proteins         | CVD3_Q8NBP7          | 0.24                     | 0.09                   | 0.42                   | 0.11                 |
| Proteins         | CVD3_Q92876          | 0.39                     | 0.09                   | 0.23                   | 0.1                  |
| Proteins         | CVD3_Q92956          | -0.13                    | 0.04                   | -0.04                  | 0.05                 |
| Proteins         | CVD3_Q96F46          | -0.09                    | 0.1                    | -0.3                   | 0.1                  |
| Proteins         | CVD3_Q96PL1          | 0.24                     | 0.09                   | -0.29                  | 0.1                  |
| Proteins         | CVD3_Q99727          | 0.32                     | 0.1                    | 0.38                   | 0.1                  |
| Proteins         | CVD3_Q99969          | 0.22                     | 0.05                   | 0.16                   | 0.07                 |
| Proteins         | CVD3_Q99988          | 1.72                     | 0.07                   | 1.54                   | 0.07                 |
| Proteins         | CVD3_Q9H2A7          | -0.06                    | 0.07                   | -0.27                  | 0.08                 |

| <b>Data type</b> | <b>Variable Name</b> | <b>Female<br/>(Mean)</b> | <b>Female<br/>(SD)</b> | <b>Male<br/>(Mean)</b> | <b>Male<br/>(SD)</b> |
|------------------|----------------------|--------------------------|------------------------|------------------------|----------------------|
| Proteins         | CVD3_Q9HD89          | -0.13                    | 0.09                   | -0.18                  | 0.1                  |
| Proteins         | CVD3_Q9NPY3          | -0.11                    | 0.05                   | -0.16                  | 0.06                 |
| Proteins         | CVD3_Q9NQ76          | -1.41                    | 0.08                   | -1.46                  | 0.08                 |
| Proteins         | CVD3_Q9UBR2          | 0.33                     | 0.06                   | 0.44                   | 0.1                  |
| Proteins         | CVD3_Q9UM47          | 0.89                     | 0.06                   | 1.04                   | 0.08                 |
| Proteins         | CVD3_Q9Y275          | -0.52                    | 0.08                   | -0.69                  | 0.12                 |
| Proteins         | CVD3_Q9Y624          | -0.08                    | 0.05                   | 0.01                   | 0.05                 |
| Proteins         | INF_O00300           | 0.25                     | 0.06                   | 0.24                   | 0.06                 |
| Proteins         | INF_O14625           | 0.07                     | 0.11                   | -0.1                   | 0.1                  |
| Proteins         | INF_O14788           | -0.05                    | 0.08                   | -0.34                  | 0.1                  |
| Proteins         | INF_O15169           | 0.05                     | 0.03                   | 0.31                   | 0.04                 |
| Proteins         | INF_O15444           | 0.42                     | 0.11                   | 0.35                   | 0.12                 |
| Proteins         | INF_O43508           | 0.02                     | 0.07                   | -0.44                  | 0.09                 |
| Proteins         | INF_O43557           | 0.05                     | 0.06                   | -0.15                  | 0.07                 |
| Proteins         | INF_O95630           | 0.06                     | 0.03                   | 0.16                   | 0.04                 |
| Proteins         | INF_O95750           | -0.05                    | 0.08                   | -0.2                   | 0.09                 |
| Proteins         | INF_P00749           | -0.14                    | 0.07                   | -0.35                  | 0.07                 |
| Proteins         | INF_P00813           | 0.06                     | 0.13                   | -0.68                  | 0.1                  |
| Proteins         | INF_P01135           | -0.91                    | 0.09                   | -0.26                  | 0.08                 |
| Proteins         | INF_P01137           | -0.02                    | 0.05                   | -0.05                  | 0.07                 |
| Proteins         | INF_P01138           | -0.54                    | 0.1                    | -0.87                  | 0.12                 |
| Proteins         | INF_P01374           | -1.01                    | 0.1                    | 0.13                   | 0.09                 |
| Proteins         | INF_P02778           | 0.37                     | 0.09                   | 0.38                   | 0.08                 |
| Proteins         | INF_P03956           | 0.3                      | 0.09                   | 0.18                   | 0.12                 |
| Proteins         | INF_P05231           | -0.07                    | 0.05                   | 0.09                   | 0.07                 |
| Proteins         | INF_P06127           | -0.27                    | 0.08                   | -0.68                  | 0.07                 |
| Proteins         | INF_P09238           | -0.49                    | 0.09                   | 0.26                   | 0.12                 |
| Proteins         | INF_P09341           | -0.17                    | 0.07                   | 0.05                   | 0.05                 |
| Proteins         | INF_P09603           | -0.55                    | 0.05                   | -0.11                  | 0.07                 |
| Proteins         | INF_P10145           | 0.02                     | 0.11                   | 0.12                   | 0.08                 |
| Proteins         | INF_P10147           | 0.38                     | 0.05                   | 0.25                   | 0.07                 |
| Proteins         | INF_P13232           | 0.09                     | 0.06                   | -0.01                  | 0.05                 |
| Proteins         | INF_P13236           | -0.06                    | 0.08                   | 0.05                   | 0.09                 |
| Proteins         | INF_P13500           | -0.29                    | 0.06                   | -0.33                  | 0.06                 |
| Proteins         | INF_P13725           | -0.36                    | 0.05                   | 0.07                   | 0.08                 |
| Proteins         | INF_P14210           | 0.57                     | 0.05                   | 0.1                    | 0.06                 |
| Proteins         | INF_P15692           | -0.04                    | 0.07                   | 0.12                   | 0.08                 |
| Proteins         | INF_P20783           | -0.4                     | 0.09                   | -0.69                  | 0.08                 |
| Proteins         | INF_P21583           | 0.11                     | 0.06                   | 0.37                   | 0.07                 |
| Proteins         | INF_P22301           | -0.29                    | 0.09                   | -0.44                  | 0.11                 |
| Proteins         | INF_P25942           | 0.15                     | 0.04                   | 0.12                   | 0.06                 |
| Proteins         | INF_P28325           | 0.32                     | 0.08                   | 0.31                   | 0.1                  |
| Proteins         | INF_P29460           | -0.39                    | 0.09                   | -0.48                  | 0.13                 |

| <b>Data type</b> | <b>Variable Name</b>                | <b>Female<br/>(Mean)</b> | <b>Female<br/>(SD)</b> | <b>Male<br/>(Mean)</b> | <b>Male<br/>(SD)</b> |
|------------------|-------------------------------------|--------------------------|------------------------|------------------------|----------------------|
| Proteins         | INF_P39905                          | 0.5                      | 0.1                    | 0.46                   | 0.12                 |
| Proteins         | INF_P42702                          | 0.12                     | 0.06                   | -0.05                  | 0.09                 |
| Proteins         | INF_P42830                          | 0.46                     | 0.08                   | 0.02                   | 0.07                 |
| Proteins         | INF_P49771                          | 0.7                      | 0.09                   | 0.54                   | 0.1                  |
| Proteins         | INF_P50225                          | 0.2                      | 0.06                   | 0.1                    | 0.05                 |
| Proteins         | INF_P50591                          | -0.06                    | 0.08                   | -0.42                  | 0.09                 |
| Proteins         | INF_P51671                          | 0.92                     | 0.06                   | 0.44                   | 0.1                  |
| Proteins         | INF_P55773                          | -0.28                    | 0.1                    | -0.02                  | 0.1                  |
| Proteins         | INF_P78423                          | 0.26                     | 0.1                    | -0.08                  | 0.09                 |
| Proteins         | INF_P78556                          | -0.56                    | 0.09                   | -1.03                  | 0.12                 |
| Proteins         | INF_P80075                          | 0.43                     | 0.1                    | -0.2                   | 0.13                 |
| Proteins         | INF_P80162                          | 0.02                     | 0.08                   | 0.12                   | 0.09                 |
| Proteins         | INF_P80511                          | -0.23                    | 0.09                   | 0.06                   | 0.11                 |
| Proteins         | INF_Q07011                          | 0.43                     | 0.07                   | -0.16                  | 0.07                 |
| Proteins         | INF_Q07325                          | 1.19                     | 0.06                   | 0.43                   | 0.1                  |
| Proteins         | INF_Q08334                          | -0.06                    | 0.08                   | -0.01                  | 0.08                 |
| Proteins         | INF_Q13291                          | -0.38                    | 0.09                   | -0.38                  | 0.1                  |
| Proteins         | INF_Q13478                          | -0.74                    | 0.11                   | -0.17                  | 0.1                  |
| Proteins         | INF_Q13541                          | 0                        | 0.06                   | 0.12                   | 0.06                 |
| Proteins         | INF_Q14116                          | -0.1                     | 0.06                   | 0.29                   | 0.07                 |
| Proteins         | INF_Q14790                          | 0.55                     | 0.08                   | 0.08                   | 0.1                  |
| Proteins         | INF_Q8IXJ6                          | 0                        | 0.03                   | 0.09                   | 0.04                 |
| Proteins         | INF_Q8NFT8                          | -0.24                    | 0.07                   | -0.5                   | 0.11                 |
| Proteins         | INF_Q8WWJ7                          | -0.22                    | 0.08                   | -0.1                   | 0.09                 |
| Proteins         | INF_Q99616                          | 0.68                     | 0.07                   | 0.6                    | 0.09                 |
| Proteins         | INF_Q99731                          | 0.24                     | 0.1                    | -0.05                  | 0.13                 |
| Proteins         | INF_Q9BZW8                          | -0.14                    | 0.06                   | -0.2                   | 0.08                 |
| Proteins         | INF_Q9GZV9                          | -0.01                    | 0.05                   | 0.04                   | 0.07                 |
| Proteins         | INF_Q9H5V8                          | 1.4                      | 0.07                   | 1.17                   | 0.09                 |
| Proteins         | INF_Q9NRJ3                          | 0.56                     | 0.09                   | 0.87                   | 0.11                 |
| Proteins         | INF_Q9NSA1                          | 0.26                     | 0.05                   | 0.14                   | 0.05                 |
| Proteins         | INF_Q9NZQ7                          | -0.62                    | 0.1                    | -0.54                  | 0.1                  |
| Proteins         | V1                                  | -0.94                    | 0.08                   | -1.32                  | 0.1                  |
| Proteins         | V2                                  | -0.08                    | 0.09                   | -0.53                  | 0.09                 |
| Proteins         | V3                                  | 0.14                     | 0.07                   | -0.07                  | 0.08                 |
| Proteins         | V4                                  | -0.35                    | 0.09                   | -0.38                  | 0.09                 |
| Proteins         | V5                                  | 0.33                     | 0.07                   | -0.18                  | 0.1                  |
| Proteins         | V6                                  | -0.09                    | 0.09                   | 0.24                   | 0.1                  |
| Proteins         | V7                                  | 0.16                     | 0.08                   | 0.08                   | 0.08                 |
| Metabolites      | intercept                           | 48.57                    | 0.13                   | 47.59                  | 0.15                 |
| Metabolites      | carnitine                           | 0.23                     | 0.06                   | -0.06                  | 0.06                 |
| Metabolites      | 3-phenylpropionate (hydrocinnamate) | -0.11                    | 0.07                   | -0.2                   | 0.07                 |
| Metabolites      | hippurate                           | 0.07                     | 0.06                   | 0.15                   | 0.07                 |

| <b>Data type</b> | <b>Variable Name</b>                      | <b>Female (Mean)</b> | <b>Female (SD)</b> | <b>Male (Mean)</b> | <b>Male (SD)</b> |
|------------------|-------------------------------------------|----------------------|--------------------|--------------------|------------------|
| Metabolites      | 3-methyl-2-oxovalerate                    | -0.48                | 0.06               | -0.44              | 0.06             |
| Metabolites      | methionine sulfoxide                      | -0.01                | 0.07               | -0.08              | 0.12             |
| Metabolites      | 3-methylhistidine                         | 0                    | 0.05               | 0.03               | 0.06             |
| Metabolites      | 5-hydroxylysine                           | -0.23                | 0.09               | 0.1                | 0.12             |
| Metabolites      | 4-guanidinobutanoate                      | -0.14                | 0.11               | -0.38              | 0.11             |
| Metabolites      | glucuronate                               | 0.32                 | 0.08               | 0.28               | 0.09             |
| Metabolites      | imidazole lactate                         | -0.17                | 0.07               | -0.14              | 0.09             |
| Metabolites      | kynurenine                                | -0.08                | 0.06               | -0.14              | 0.09             |
| Metabolites      | glycerophosphorylcholine (GPC)            | -0.15                | 0.05               | 0.16               | 0.05             |
| Metabolites      | maltotriose                               | 0.07                 | 0.06               | -0.27              | 0.09             |
| Metabolites      | N-acetylglutamate                         | 0.39                 | 0.09               | 0.09               | 0.09             |
| Metabolites      | ribitol                                   | -0.03                | 0.09               | -0.24              | 0.11             |
| Metabolites      | glycodeoxycholate                         | 0.05                 | 0.06               | -0.01              | 0.06             |
| Metabolites      | theophylline                              | 0                    | 0.04               | 0.07               | 0.04             |
| Metabolites      | quinatate                                 | 0.19                 | 0.06               | 0.24               | 0.07             |
| Metabolites      | theobromine                               | -0.18                | 0.05               | -0.12              | 0.06             |
| Metabolites      | gentisate                                 | -0.12                | 0.09               | -0.05              | 0.11             |
| Metabolites      | paraxanthine                              | -0.06                | 0.05               | 0                  | 0.05             |
| Metabolites      | indolelactate                             | -0.13                | 0.06               | -0.17              | 0.07             |
| Metabolites      | 3-indoxyl sulfate                         | 0.05                 | 0.06               | -0.27              | 0.07             |
| Metabolites      | gamma-glutamylphenylalanine               | 0.32                 | 0.09               | -0.05              | 0.08             |
| Metabolites      | 1-palmityl-GPC (O-16:0)                   | -0.2                 | 0.05               | -0.14              | 0.04             |
| Metabolites      | 1-stearoyl-2-arachidonoyl-GPI (18:0/20:4) | 0.17                 | 0.06               | 0.2                | 0.06             |
| Metabolites      | sphingosine 1-phosphate                   | -0.16                | 0.05               | -0.16              | 0.07             |
| Metabolites      | 1-stearoyl-2-oleoyl-GPS (18:0/18:1)       | -0.23                | 0.06               | -0.19              | 0.06             |
| Metabolites      | 1-stearoyl-GPI (18:0)                     | 0.24                 | 0.05               | 0.2                | 0.06             |
| Metabolites      | 1,2-dipalmitoyl-GPC (16:0/16:0)           | -0.19                | 0.06               | -0.14              | 0.07             |
| Metabolites      | 1-myristoyl-2-palmitoyl-GPC (14:0/16:0)   | 0.16                 | 0.04               | 0.04               | 0.04             |
| Metabolites      | alpha-hydroxyisocaproate                  | -0.51                | 0.06               | -0.47              | 0.06             |
| Metabolites      | maleate                                   | 0.04                 | 0.08               | 0.1                | 0.09             |
| Metabolites      | 2-hydroxyoctanoate                        | 0.08                 | 0.09               | -0.16              | 0.1              |
| Metabolites      | 3-hydroxyoctanoate                        | -0.11                | 0.06               | 0.17               | 0.06             |
| Metabolites      | phenyllactate (PLA)                       | -0.25                | 0.06               | -0.49              | 0.05             |
| Metabolites      | palmitoylcarnitine (C16)                  | 0.18                 | 0.05               | -0.03              | 0.05             |
| Metabolites      | hexanoylcarnitine (C6)                    | 0.03                 | 0.04               | -0.03              | 0.05             |
| Metabolites      | N-acetylaspartate (NAA)                   | 0.2                  | 0.06               | -0.22              | 0.09             |
| Metabolites      | dehydroepiandrosterone sulfate (DHEA-S)   | -0.58                | 0.04               | -0.81              | 0.05             |
| Metabolites      | acetylcarnitine (C2)                      | 0.08                 | 0.04               | 0.02               | 0.04             |
| Metabolites      | cysteine s-sulfate                        | 0.37                 | 0.06               | 0.35               | 0.06             |
| Metabolites      | 1-palmitoylglycerol (16:0)                | -0.03                | 0.09               | -0.42              | 0.11             |
| Metabolites      | 3-hydroxymyristate                        | 0.05                 | 0.05               | 0.28               | 0.06             |
| Metabolites      | iminodiacetate (IDA)                      | -0.04                | 0.05               | -0.01              | 0.07             |
| Metabolites      | 1-oleoylglycerol (18:1)                   | 0.23                 | 0.08               | 0.16               | 0.08             |

| <b>Data type</b> | <b>Variable Name</b>               | <b>Female (Mean)</b> | <b>Female (SD)</b> | <b>Male (Mean)</b> | <b>Male (SD)</b> |
|------------------|------------------------------------|----------------------|--------------------|--------------------|------------------|
| Metabolites      | 3-methyl-2-oxobutyrate             | -0.21                | 0.07               | -0.27              | 0.07             |
| Metabolites      | homoarginine                       | -0.48                | 0.06               | 0.02               | 0.08             |
| Metabolites      | homocitrulline                     | 0.3                  | 0.09               | 0.03               | 0.09             |
| Metabolites      | 3-hydroxydecanoate                 | -0.03                | 0.05               | 0.22               | 0.06             |
| Metabolites      | EDTA                               | 0.09                 | 0.08               | 0.37               | 0.09             |
| Metabolites      | ribonate                           | 0.23                 | 0.1                | -0.49              | 0.09             |
| Metabolites      | indoleacetate                      | -0.31                | 0.09               | -0.11              | 0.11             |
| Metabolites      | 1-linoleoylglycerol (18:2)         | -0.03                | 0.08               | 0.11               | 0.06             |
| Metabolites      | 1-methylhistidine                  | 0.09                 | 0.06               | 0.07               | 0.08             |
| Metabolites      | butyrylcarnitine (C4)              | -0.03                | 0.06               | -0.07              | 0.07             |
| Metabolites      | isobutyrylcarnitine (C4)           | 0                    | 0.06               | 0.03               | 0.08             |
| Metabolites      | androsterone sulfate               | -0.31                | 0.04               | -0.45              | 0.05             |
| Metabolites      | indolepropionate                   | -0.43                | 0.1                | -0.07              | 0.09             |
| Metabolites      | trigonelline (N'-methylnicotinate) | 0.1                  | 0.08               | 0.19               | 0.09             |
| Metabolites      | dodecanedioate (C12-DC)            | 0.26                 | 0.06               | -0.03              | 0.05             |
| Metabolites      | N-acetyltyrosine                   | 0                    | 0.07               | 0.24               | 0.07             |
| Metabolites      | 1,3-dimethylurate                  | 0.06                 | 0.06               | 0.34               | 0.05             |
| Metabolites      | 3-methylxanthine                   | -0.11                | 0.05               | -0.14              | 0.06             |
| Metabolites      | 3-hydroxylaurate                   | 0.11                 | 0.04               | 0.24               | 0.06             |
| Metabolites      | gamma-glutamylvaline               | 0.4                  | 0.07               | 0                  | 0.06             |
| Metabolites      | pyroglutamylvaline                 | 0.08                 | 0.09               | 0                  | 0.1              |
| Metabolites      | propionylglycine                   | -0.08                | 0.08               | -0.35              | 0.1              |
| Metabolites      | propionylcarnitine (C3)            | 0.06                 | 0.06               | -0.21              | 0.08             |
| Metabolites      | pro-hydroxy-pro                    | -0.05                | 0.09               | -0.56              | 0.1              |
| Metabolites      | 3-hydroxy-2-ethylpropionate        | -0.28                | 0.06               | -0.05              | 0.06             |
| Metabolites      | docosadienoate (22:2n6)            | -0.08                | 0.04               | 0.15               | 0.05             |
| Metabolites      | adrenate (22:4n6)                  | 0.09                 | 0.06               | -0.08              | 0.08             |
| Metabolites      | 10-undecenoate (11:1n1)            | -0.14                | 0.07               | -0.11              | 0.08             |
| Metabolites      | myristoleate (14:1n5)              | -0.09                | 0.04               | -0.18              | 0.04             |
| Metabolites      | 1-methyl-4-imidazoleacetate        | 0.73                 | 0.09               | 0.65               | 0.09             |
| Metabolites      | sebacate (C10-DC)                  | 0.09                 | 0.08               | -0.29              | 0.08             |
| Metabolites      | 5-dodecenoate (12:1n7)             | -0.18                | 0.06               | -0.13              | 0.05             |
| Metabolites      | octanoylcarnitine (C8)             | -0.02                | 0.03               | -0.01              | 0.04             |
| Metabolites      | decanoylcarnitine (C10)            | 0.02                 | 0.04               | 0.05               | 0.05             |
| Metabolites      | N-acetylglutamine                  | 0.02                 | 0.06               | 0.09               | 0.08             |
| Metabolites      | N-acetyltryptophan                 | 0.13                 | 0.07               | 0.49               | 0.09             |
| Metabolites      | N-acetylphenylalanine              | 0.02                 | 0.05               | 0.1                | 0.06             |
| Metabolites      | gamma-glutamyl-epsilon-lysine      | -0.27                | 0.08               | -0.06              | 0.09             |
| Metabolites      | 1-palmitoyl-GPC (16:0)             | -0.27                | 0.04               | 0.07               | 0.04             |
| Metabolites      | 1-margaroyl-GPC (17:0)             | -0.16                | 0.03               | 0.03               | 0.05             |
| Metabolites      | N-acetylarginine                   | 0.33                 | 0.05               | 0.02               | 0.06             |
| Metabolites      | piperine                           | 0.05                 | 0.05               | -0.05              | 0.05             |
| Metabolites      | myristoylcarnitine (C14)           | 0.13                 | 0.04               | 0.32               | 0.06             |

| <b>Data type</b> | <b>Variable Name</b>                       | <b>Female (Mean)</b> | <b>Female (SD)</b> | <b>Male (Mean)</b> | <b>Male (SD)</b> |
|------------------|--------------------------------------------|----------------------|--------------------|--------------------|------------------|
| Metabolites      | 1-oleoyl-GPC (18:1)                        | 0.04                 | 0.03               | -0.08              | 0.04             |
| Metabolites      | N-acetylthreonine                          | 0.05                 | 0.07               | 0.07               | 0.07             |
| Metabolites      | N-acetylisooleucine                        | 0.14                 | 0.09               | -0.05              | 0.1              |
| Metabolites      | 10-nonadecenoate (19:1n9)                  | -0.02                | 0.04               | -0.07              | 0.04             |
| Metabolites      | 10-heptadecenoate (17:1n7)                 | 0.04                 | 0.03               | -0.09              | 0.04             |
| Metabolites      | epiandrosterone sulfate                    | -0.15                | 0.05               | -0.05              | 0.05             |
| Metabolites      | N-acetylhistidine                          | 0.31                 | 0.09               | 0.08               | 0.1              |
| Metabolites      | gamma-glutamylglycine                      | -0.03                | 0.05               | -0.28              | 0.06             |
| Metabolites      | gamma-glutamyltryptophan                   | -0.07                | 0.08               | -0.33              | 0.1              |
| Metabolites      | stachydrine                                | 0.19                 | 0.05               | 0.39               | 0.07             |
| Metabolites      | alpha-hydroxyisovalerate                   | -0.01                | 0.07               | -0.2               | 0.07             |
| Metabolites      | gamma-glutamylmethionine                   | -0.04                | 0.06               | 0.03               | 0.08             |
| Metabolites      | gamma-glutamylthreonine                    | -0.05                | 0.07               | -0.06              | 0.07             |
| Metabolites      | p-cresol sulfate                           | 0.2                  | 0.05               | 0.27               | 0.07             |
| Metabolites      | erythronate*                               | -0.01                | 0.06               | -0.17              | 0.09             |
| Metabolites      | eicosenoate (20:1)                         | 0.13                 | 0.04               | 0.04               | 0.05             |
| Metabolites      | linolenate [alpha or gamma; (18:3n3 or 6)] | 0.04                 | 0.04               | -0.13              | 0.06             |
| Metabolites      | aconitate [cis or trans]                   | 0.53                 | 0.05               | 0.24               | 0.08             |
| Metabolites      | 1-myristoyl-GPC (14:0)                     | -0.09                | 0.03               | 0.07               | 0.05             |
| Metabolites      | 1-arachidoyl-GPC (20:0)                    | -0.1                 | 0.06               | 0.25               | 0.07             |
| Metabolites      | stearoylcarnitine (C18)                    | 0.44                 | 0.05               | 0.16               | 0.05             |
| Metabolites      | laurylcarnitine (C12)                      | -0.1                 | 0.05               | 0.1                | 0.05             |
| Metabolites      | isovalerylcarnitine (C5)                   | -0.09                | 0.08               | -0.18              | 0.07             |
| Metabolites      | 7-methylxanthine                           | -0.32                | 0.05               | -0.16              | 0.06             |
| Metabolites      | 1,7-dimethylurate                          | 0.15                 | 0.04               | 0.19               | 0.05             |
| Metabolites      | 5-acetylamino-6-formylamino-3-methyluracil | -0.14                | 0.08               | 0.02               | 0.09             |
| Metabolites      | 5-acetylamino-6-amino-3-methyluracil       | -0.16                | 0.05               | 0.12               | 0.06             |
| Metabolites      | 1-methylxanthine                           | -0.02                | 0.07               | -0.06              | 0.07             |
| Metabolites      | N1-methylinosine                           | -0.2                 | 0.06               | 0.12               | 0.08             |
| Metabolites      | N2,N2-dimethylguanosine                    | -0.11                | 0.05               | 0.18               | 0.06             |
| Metabolites      | N4-acetylcytidine                          | -0.2                 | 0.08               | 0.17               | 0.08             |
| Metabolites      | N6-carbamoylthreonyladenosine              | -0.04                | 0.06               | 0.16               | 0.06             |
| Metabolites      | orotidine                                  | -0.01                | 0.08               | -0.1               | 0.09             |
| Metabolites      | phenylacetylglutamine                      | 0.3                  | 0.05               | 0.07               | 0.06             |
| Metabolites      | 4-hydroxyhippurate                         | -0.05                | 0.08               | -0.23              | 0.09             |
| Metabolites      | 5,6-dihydrouridine                         | -0.05                | 0.05               | -0.19              | 0.08             |
| Metabolites      | 3-(3-amino-3-carboxypropyl)uridine*        | 0.04                 | 0.06               | -0.22              | 0.08             |
| Metabolites      | 1-arachidonylglycerol (20:4)               | 0.27                 | 0.09               | -0.1               | 0.08             |
| Metabolites      | 5-methyluridine (ribothymidine)            | -0.15                | 0.09               | 0.08               | 0.11             |
| Metabolites      | isovalerylglycine                          | 0.09                 | 0.07               | 0.28               | 0.11             |
| Metabolites      | 7-methylguanine                            | -0.3                 | 0.08               | -0.06              | 0.07             |
| Metabolites      | 1-stearoyl-GPE (18:0)                      | 0.1                  | 0.03               | 0.08               | 0.03             |

| <b>Data type</b> | <b>Variable Name</b>                           | <b>Female (Mean)</b> | <b>Female (SD)</b> | <b>Male (Mean)</b> | <b>Male (SD)</b> |
|------------------|------------------------------------------------|----------------------|--------------------|--------------------|------------------|
| Metabolites      | N1-Methyl-2-pyridone-5-carboxamide             | 0.03                 | 0.06               | 0.21               | 0.07             |
| Metabolites      | gamma-glutamylisoleucine*                      | -0.02                | 0.06               | 0.08               | 0.06             |
| Metabolites      | oleoylcarnitine (C18:1)                        | 0.32                 | 0.03               | 0.11               | 0.04             |
| Metabolites      | 2-methylbutyrylcarnitine (C5)                  | -0.18                | 0.07               | -0.44              | 0.08             |
| Metabolites      | phenol sulfate                                 | 0.11                 | 0.08               | -0.04              | 0.11             |
| Metabolites      | 1-palmitoleoyl-GPC (16:1)*                     | -0.11                | 0.05               | -0.13              | 0.05             |
| Metabolites      | pyroglutamine*                                 | -0.03                | 0.07               | -0.51              | 0.08             |
| Metabolites      | 2-hydroxy-3-methylvalerate                     | -0.16                | 0.06               | -0.43              | 0.06             |
| Metabolites      | homostachydrine*                               | -0.3                 | 0.09               | -0.08              | 0.1              |
| Metabolites      | 1-dihomo-linolenoyl-GPC (20:3n3 or 6)*         | 0.07                 | 0.04               | -0.08              | 0.06             |
| Metabolites      | 2-oleoyl-GPC (18:1)*                           | 0.03                 | 0.04               | -0.06              | 0.05             |
| Metabolites      | 2-palmitoyl-GPC (16:0)*                        | -0.07                | 0.05               | -0.04              | 0.06             |
| Metabolites      | 2-myristoyl-GPC (14:0)*                        | 0.01                 | 0.05               | 0.15               | 0.06             |
| Metabolites      | 1-palmitoyl-GPE (16:0)                         | 0.22                 | 0.04               | 0.17               | 0.06             |
| Metabolites      | 1-oleoyl-GPE (18:1)                            | -0.1                 | 0.04               | -0.14              | 0.05             |
| Metabolites      | 1-arachidonoyl-GPE (20:4n6)*                   | 0.04                 | 0.06               | -0.14              | 0.06             |
| Metabolites      | N-acetylcitrulline                             | 0.12                 | 0.06               | -0.14              | 0.07             |
| Metabolites      | 2-hydroxypalmitate                             | 0.01                 | 0.05               | 0.21               | 0.06             |
| Metabolites      | docosapentaenoate (n6 DPA; 22:5n6)             | -0.31                | 0.08               | -0.16              | 0.08             |
| Metabolites      | isobutyrylglycine                              | 0.27                 | 0.06               | -0.1               | 0.1              |
| Metabolites      | glutaryl carnitine (C5-DC)                     | 0.14                 | 0.1                | -0.01              | 0.09             |
| Metabolites      | tiglylcarnitine (C5:1-DC)                      | 0                    | 0.07               | -0.27              | 0.1              |
| Metabolites      | hydroquinone sulfate                           | -0.14                | 0.1                | -0.15              | 0.09             |
| Metabolites      | catechol sulfate                               | 0.11                 | 0.06               | -0.12              | 0.08             |
| Metabolites      | 7-alpha-hydroxy-3-oxo-4-cholestenoate (7-Hoca) | 0.14                 | 0.08               | -0.22              | 0.1              |
| Metabolites      | tetradecanedioate (C14-DC)                     | 0.14                 | 0.05               | -0.02              | 0.06             |
| Metabolites      | hexadecanedioate (C16-DC)                      | 0.18                 | 0.05               | 0.16               | 0.05             |
| Metabolites      | glycerophosphoethanolamine                     | -0.05                | 0.05               | 0.03               | 0.05             |
| Metabolites      | ectoine                                        | 0.13                 | 0.09               | -0.17              | 0.1              |
| Metabolites      | 2-oleoyl-GPE (18:1)*                           | -0.21                | 0.06               | -0.17              | 0.07             |
| Metabolites      | 2-palmitoyl-GPE (16:0)*                        | 0.21                 | 0.06               | 0.17               | 0.08             |
| Metabolites      | 1-arachidonoyl-GPI (20:4)*                     | 0.34                 | 0.06               | 0.22               | 0.07             |
| Metabolites      | 1-palmitoyl-GPI (16:0)                         | -0.02                | 0.05               | 0.27               | 0.07             |
| Metabolites      | glycolithocholate sulfate*                     | 0.08                 | 0.06               | 0.11               | 0.08             |
| Metabolites      | tauroolithocholate 3-sulfate                   | -0.11                | 0.06               | -0.03              | 0.08             |
| Metabolites      | deoxycarnitine                                 | -0.38                | 0.08               | 0.13               | 0.1              |
| Metabolites      | 1-ribosyl-imidazoleacetate*                    | 0.24                 | 0.08               | 0.14               | 0.07             |
| Metabolites      | 2-arachidonoyl-GPE (20:4)*                     | 0.25                 | 0.07               | -0.14              | 0.08             |
| Metabolites      | hexanoylglutamine                              | 0.09                 | 0.07               | -0.31              | 0.08             |
| Metabolites      | N6-acetyllysine                                | -0.22                | 0.08               | 0.17               | 0.09             |
| Metabolites      | dihomo-linolenate (20:3n3 or n6)               | -0.1                 | 0.04               | 0.01               | 0.05             |
| Metabolites      | tryptophan betaine                             | -0.43                | 0.09               | -0.21              | 0.09             |

| <b>Data type</b> | <b>Variable Name</b>                                                 | <b>Female (Mean)</b> | <b>Female (SD)</b> | <b>Male (Mean)</b> | <b>Male (SD)</b> |
|------------------|----------------------------------------------------------------------|----------------------|--------------------|--------------------|------------------|
| Metabolites      | 4-vinylphenol sulfate                                                | -0.07                | 0.07               | -0.06              | 0.09             |
| Metabolites      | 4-ethylphenylsulfate                                                 | -0.49                | 0.08               | -0.16              | 0.1              |
| Metabolites      | thymol sulfate                                                       | 0.07                 | 0.09               | 0.16               | 0.12             |
| Metabolites      | 1-oleoyl-GPI (18:1)                                                  | 0.09                 | 0.06               | 0.13               | 0.06             |
| Metabolites      | 1-linoleoyl-GPI (18:2)*                                              | 0.08                 | 0.06               | 0.07               | 0.07             |
| Metabolites      | dimethylarginine (SDMA + ADMA)                                       | 0.01                 | 0.05               | 0.18               | 0.07             |
| Metabolites      | N-acetylserine                                                       | -0.19                | 0.07               | 0.02               | 0.07             |
| Metabolites      | 1-stearoyl-2-oleoyl-GPE (18:0/18:1)                                  | -0.2                 | 0.05               | -0.07              | 0.04             |
| Metabolites      | 4-allylphenol sulfate                                                | 0.44                 | 0.1                | 0.13               | 0.14             |
| Metabolites      | 1-palmitoyl-2-linoleoyl-GPE (16:0/18:2)                              | -0.08                | 0.04               | 0.02               | 0.04             |
| Metabolites      | sphinganine-1-phosphate glycosyl-N-stearoyl-sphingosine (d18:1/18:0) | -0.01                | 0.06               | 0.08               | 0.08             |
| Metabolites      | succinylcarnitine (C4-DC)                                            | -0.17                | 0.08               | 0.74               | 0.08             |
| Metabolites      | bilirubin (E,E)*                                                     | 0.69                 | 0.09               | 0.2                | 0.09             |
| Metabolites      | bilirubin (E,Z or Z,E)*                                              | 0.09                 | 0.06               | 0.16               | 0.07             |
| Metabolites      | N-methylproline                                                      | 0.04                 | 0.05               | -0.06              | 0.06             |
| Metabolites      | 5alpha-androstan-3beta,17beta-diol disulfate                         | 0.13                 | 0.06               | 0.35               | 0.07             |
| Metabolites      | 5alpha-pregnan-3beta,20alpha-diol disulfate                          | 0.15                 | 0.05               | 0.31               | 0.08             |
| Metabolites      | glycocholenate sulfate*                                              | -0.05                | 0.05               | 0.49               | 0.08             |
| Metabolites      | taurocholenate sulfate*                                              | -0.19                | 0.06               | -0.24              | 0.08             |
| Metabolites      | androstenediol (3beta,17beta) disulfate (1)                          | -0.17                | 0.06               | -0.4               | 0.08             |
| Metabolites      | pregnenediol disulfate (C21H34O8S2)*                                 | -0.02                | 0.06               | 0.06               | 0.06             |
| Metabolites      | androstenediol (3beta,17beta) disulfate (2)                          | -0.01                | 0.05               | 0.16               | 0.06             |
| Metabolites      | 21-hydroxypregnenolone disulfate                                     | -0.24                | 0.05               | -0.61              | 0.07             |
| Metabolites      | 5alpha-pregnan-3beta,20beta-diol monosulfate (1)                     | -0.14                | 0.06               | -0.25              | 0.06             |
| Metabolites      | 5alpha-pregnan-3beta,20alpha-diol monosulfate (2)                    | -0.06                | 0.04               | -0.17              | 0.07             |
| Metabolites      | 5alpha-androstan-3alpha,17beta-diol monosulfate (1)                  | -0.04                | 0.04               | 0.08               | 0.06             |
| Metabolites      | 5alpha-androstan-3beta,17alpha-diol disulfate                        | -0.04                | 0.06               | -0.48              | 0.05             |
| Metabolites      | 5alpha-androstan-3beta,17beta-diol monosulfate (2)                   | 0.16                 | 0.1                | 0.56               | 0.09             |
| Metabolites      | androstenediol (3alpha,17alpha) monosulfate (2)                      | 0.11                 | 0.08               | -0.2               | 0.05             |
| Metabolites      | androstenediol (3alpha,17alpha) monosulfate (3)                      | -0.52                | 0.06               | -1.2               | 0.09             |
| Metabolites      | androstenediol (3beta,17beta) monosulfate (1)                        | -0.39                | 0.06               | -0.56              | 0.09             |
| Metabolites      | androstenediol (3beta,17beta) monosulfate (2)                        | -0.41                | 0.05               | -0.71              | 0.06             |
| Metabolites      | pregnenediol sulfate (C21H34O5S)*                                    | -0.11                | 0.07               | -0.23              | 0.08             |
| Metabolites      | 2-hydroxyglutarate                                                   | -0.29                | 0.05               | -0.42              | 0.05             |
| Metabolites      |                                                                      | -0.04                | 0.09               | 0.33               | 0.1              |



| <b>Data type</b> | <b>Variable Name</b>                       | <b>Female (Mean)</b> | <b>Female (SD)</b> | <b>Male (Mean)</b> | <b>Male (SD)</b> |
|------------------|--------------------------------------------|----------------------|--------------------|--------------------|------------------|
| Metabolites      | gamma-CEHC                                 | -0.31                | 0.09               | 0.15               | 0.09             |
| Metabolites      | N-acetyl-beta-alanine                      | -0.38                | 0.07               | -0.33              | 0.09             |
| Metabolites      | sphingomyelin (d18:1/18:1, d18:2/18:0)     | 0.24                 | 0.05               | -0.03              | 0.06             |
| Metabolites      | 3-hydroxyhippurate                         | -0.16                | 0.08               | 0                  | 0.09             |
| Metabolites      | 16a-hydroxy DHEA 3-sulfate                 | -0.27                | 0.06               | -0.29              | 0.06             |
| Metabolites      | pregnenolone sulfate                       | -0.23                | 0.06               | -0.23              | 0.05             |
| Metabolites      | andro steroid monosulfate C19H28O6S (1)*   | -0.19                | 0.07               | -0.26              | 0.07             |
| Metabolites      | 1-margaroyl-GPE (17:0)*                    | 0.24                 | 0.08               | -0.12              | 0.08             |
| Metabolites      | 1-pentadecanoyl-GPC (15:0)*                | -0.17                | 0.04               | -0.01              | 0.05             |
| Metabolites      | indole-3-carboxylate                       | -0.12                | 0.09               | -0.45              | 0.1              |
| Metabolites      | 13-HODE + 9-HODE                           | -0.16                | 0.08               | -0.13              | 0.07             |
| Metabolites      | tridecenedioate (C13:1-DC)*                | -0.24                | 0.06               | 0.03               | 0.07             |
| Metabolites      | 4-cholesten-3-one                          | 0.3                  | 0.09               | 0.33               | 0.11             |
| Metabolites      | cinnamoylglycine                           | 0.26                 | 0.07               | 0.07               | 0.07             |
| Metabolites      | cis-4-decenoylcarnitine (C10:1)            | -0.02                | 0.05               | -0.03              | 0.05             |
| Metabolites      | (16 or 17)-methylstearate (a19:0 or i19:0) | -0.09                | 0.04               | 0.02               | 0.06             |
| Metabolites      | 3-methylglutaconate                        | 0.16                 | 0.1                | 0.04               | 0.11             |
| Metabolites      | isoursodeoxycholate                        | -0.36                | 0.07               | -0.19              | 0.08             |
| Metabolites      | hydantoin-5-propionate                     | -0.05                | 0.09               | 0.06               | 0.09             |
| Metabolites      | sulfate*                                   | 0                    | 0.09               | 0.45               | 0.08             |
| Metabolites      | S-methylcysteine                           | 0.16                 | 0.05               | 0.13               | 0.07             |
| Metabolites      | androsterone glucuronide                   | -0.56                | 0.06               | -0.61              | 0.08             |
| Metabolites      | argininate*                                | 0                    | 0.08               | -0.02              | 0.1              |
| Metabolites      | 2-oxoarginine*                             | 0.03                 | 0.07               | -0.14              | 0.06             |
| Metabolites      | cis-4-decenoate (10:1n6)*                  | 0.03                 | 0.07               | -0.11              | 0.07             |
| Metabolites      | 1-(1-enyl-palmitoyl)-GPC (P-16:0)*         | -0.15                | 0.03               | -0.09              | 0.04             |
| Metabolites      | 1-(1-enyl-oleoyl)-GPC (P-18:1)*            | -0.21                | 0.06               | -0.25              | 0.07             |
| Metabolites      | 1-methyl-5-imidazoleacetate                | -0.08                | 0.06               | -0.16              | 0.07             |
| Metabolites      | glycoursodeoxycholate                      | -0.1                 | 0.07               | -0.19              | 0.07             |
| Metabolites      | S-methylcysteine sulfoxide                 | 0.16                 | 0.07               | 0.18               | 0.07             |
| Metabolites      | eicosanedioate (C20-DC)                    | -0.08                | 0.06               | -0.24              | 0.06             |
| Metabolites      | docosadioate (C22-DC)                      | -0.08                | 0.08               | -0.01              | 0.07             |
| Metabolites      | 16-hydroxypalmitate                        | 0.13                 | 0.06               | 0.28               | 0.07             |
| Metabolites      | oleoyl-linoleoyl-glycerol (18:1/18:2) [1]  | -0.09                | 0.04               | -0.12              | 0.04             |
| Metabolites      | oleoyl-linoleoyl-glycerol (18:1/18:2) [2]  | -0.04                | 0.03               | -0.14              | 0.05             |
| Metabolites      | 1-(1-enyl-palmitoyl)-GPE (P-16:0)*         | 0.04                 | 0.04               | -0.07              | 0.05             |
| Metabolites      | 1-(1-enyl-stearoyl)-GPE (P-18:0)*          | 0.14                 | 0.04               | -0.03              | 0.04             |
| Metabolites      | N-oleoyltaurine                            | 0.25                 | 0.09               | 0.23               | 0.09             |
| Metabolites      | isoleucylglycine                           | 0.32                 | 0.08               | -0.14              | 0.11             |
| Metabolites      | carboxyethyl-GABA                          | 0.24                 | 0.09               | 0.25               | 0.1              |
| Metabolites      | beta-citrylglutamate                       | 0.3                  | 0.09               | -0.03              | 0.09             |
| Metabolites      | trimethylamine N-oxide                     | 0.34                 | 0.09               | 0.06               | 0.1              |
| Metabolites      | imidazole propionate                       | -0.1                 | 0.1                | 0.1                | 0.11             |

| <b>Data type</b> | <b>Variable Name</b>                    | <b>Female (Mean)</b> | <b>Female (SD)</b> | <b>Male (Mean)</b> | <b>Male (SD)</b> |
|------------------|-----------------------------------------|----------------------|--------------------|--------------------|------------------|
| Metabolites      | pregnenediol-3-glucuronide              | -0.21                | 0.04               | 0.16               | 0.06             |
| Metabolites      | phenylalanyltryptophan                  | 0.08                 | 0.09               | 0.12               | 0.11             |
| Metabolites      | N-palmitoylglycine                      | -0.42                | 0.06               | -0.23              | 0.08             |
| Metabolites      | succinimide                             | 0.13                 | 0.09               | 0.07               | 0.09             |
| Metabolites      | 2-stearoyl-GPE (18:0)*                  | 0.37                 | 0.07               | -0.03              | 0.09             |
| Metabolites      | (R)-3-hydroxybutyrylcarnitine           | -0.01                | 0.06               | 0.06               | 0.06             |
| Metabolites      | N-acetylcarnosine                       | -0.03                | 0.07               | -0.46              | 0.09             |
| Metabolites      | margaroylcarnitine (C17)*               | 0.12                 | 0.05               | 0.06               | 0.05             |
| Metabolites      | 2-hydroxydecanoate                      | -0.14                | 0.1                | 0.07               | 0.1              |
| Metabolites      | 4-methylcatechol sulfate                | 0.09                 | 0.09               | 0.11               | 0.08             |
| Metabolites      | 3-methyl catechol sulfate (1)           | 0.07                 | 0.08               | 0.31               | 0.08             |
| Metabolites      | guaiacol sulfate                        | 0.15                 | 0.06               | -0.1               | 0.07             |
| Metabolites      | 2-piperidinone                          | -0.05                | 0.07               | -0.1               | 0.08             |
| Metabolites      | N-acetyl-1-methylhistidine*             | 0.02                 | 0.06               | -0.05              | 0.06             |
| Metabolites      | 2-aminophenol sulfate                   | -0.13                | 0.1                | -0.09              | 0.08             |
| Metabolites      | sphingomyelin (d18:1/14:0, d16:1/16:0)* | 0.26                 | 0.05               | 0.31               | 0.05             |
| Metabolites      | 6-oxopiperidine-2-carboxylate           | 0.01                 | 0.08               | 0.07               | 0.1              |
| Metabolites      | S-allylcysteine                         | -0.22                | 0.07               | -0.3               | 0.08             |
| Metabolites      | N-delta-acetylorlornithine              | 0.19                 | 0.06               | 0.14               | 0.07             |
| Metabolites      | acisoga                                 | -0.11                | 0.07               | 0.02               | 0.1              |
| Metabolites      | 2-aminoheptanoate                       | -0.35                | 0.08               | 0.32               | 0.11             |
| Metabolites      | N2,N5-diacetylorlornithine              | 0.31                 | 0.07               | -0.02              | 0.07             |
| Metabolites      | 1-linolenoyl-GPC (18:3)*                | -0.15                | 0.05               | -0.03              | 0.06             |
| Metabolites      | N-acetyllalliin                         | -0.2                 | 0.08               | -0.39              | 0.09             |
| Metabolites      | 1-(1-enyl-oleoyl)-GPE (P-18:1)*         | 0.02                 | 0.03               | -0.09              | 0.04             |
| Metabolites      | O-sulfo-L-tyrosine                      | 0.2                  | 0.08               | 0.11               | 0.1              |
| Metabolites      | etiocholanolone glucuronide             | -0.73                | 0.07               | -0.07              | 0.08             |
| Metabolites      | N-acetyltaurine                         | -0.21                | 0.09               | 0.01               | 0.1              |
| Metabolites      | 1-linolenoyl-GPE (18:3)*                | -0.23                | 0.07               | -0.15              | 0.08             |
| Metabolites      | 1-palmitoyl-GPG (16:0)*                 | -0.08                | 0.08               | 0.19               | 0.09             |
| Metabolites      | 9-hydroxystearate                       | -0.31                | 0.06               | -0.34              | 0.08             |
| Metabolites      | 3-methylglutarylcarnitine (2)           | 0.08                 | 0.08               | 0.54               | 0.09             |
| Metabolites      | sphingomyelin (d18:2/14:0, d18:1/14:1)* | 0.2                  | 0.06               | 0.02               | 0.05             |
| Metabolites      | sphingomyelin (d18:1/24:1, d18:2/24:0)* | -0.02                | 0.04               | -0.01              | 0.05             |
| Metabolites      | octadecenedioylcarnitine (C18:1-DC)*    | 0.04                 | 0.06               | 0.34               | 0.07             |
| Metabolites      | myristoleoylcarnitine (C14:1)*          | 0.11                 | 0.05               | 0.09               | 0.05             |
| Metabolites      | N-formylphenylalanine                   | 0.11                 | 0.09               | -0.2               | 0.11             |
| Metabolites      | cyclo(pro-val)                          | 0.05                 | 0.07               | -0.13              | 0.08             |
| Metabolites      | 4-hydroxychlorothalonil                 | 0.09                 | 0.09               | -0.15              | 0.1              |
| Metabolites      | tyramine O-sulfate                      | -0.04                | 0.09               | 0.06               | 0.1              |
| Metabolites      | 3-hydroxypyridine sulfate               | 0.16                 | 0.06               | 0.31               | 0.06             |
| Metabolites      | arabonate/xylonate                      | 0.53                 | 0.08               | 0.38               | 0.08             |
| Metabolites      | methyl-4-hydroxybenzoate sulfate        | 0.17                 | 0.09               | 0.33               | 0.12             |

| <b>Data type</b> | <b>Variable Name</b>                                   | <b>Female (Mean)</b> | <b>Female (SD)</b> | <b>Male (Mean)</b> | <b>Male (SD)</b> |
|------------------|--------------------------------------------------------|----------------------|--------------------|--------------------|------------------|
| Metabolites      | vanillactate                                           | 0.26                 | 0.08               | 0.19               | 0.08             |
| Metabolites      | p-cresol glucuronide*                                  | 0.29                 | 0.08               | 0.28               | 0.08             |
| Metabolites      | 6-hydroxyindole sulfate                                | 0.01                 | 0.05               | -0.19              | 0.07             |
| Metabolites      | sphingomyelin (d18:1/20:0, d16:1/22:0)*                | 0.18                 | 0.04               | 0.19               | 0.06             |
| Metabolites      | sphingomyelin (d18:1/20:2, d18:2/20:1, d16:1/22:2)*    | -0.09                | 0.06               | -0.17              | 0.07             |
| Metabolites      | behenoyl sphingomyelin (d18:1/22:0)*                   | 0.06                 | 0.05               | -0.06              | 0.05             |
| Metabolites      | sphingomyelin (d18:1/22:2, d18:2/22:1, d16:1/24:2)*    | -0.12                | 0.04               | -0.22              | 0.05             |
| Metabolites      | lignoceroyl sphingomyelin (d18:1/24:0)                 | 0.1                  | 0.05               | -0.3               | 0.06             |
| Metabolites      | dopamine 3-O-sulfate                                   | 0.1                  | 0.08               | 0.23               | 0.1              |
| Metabolites      | 3-hydroxyhexanoate                                     | 0.03                 | 0.06               | 0.1                | 0.05             |
| Metabolites      | 3beta-hydroxy-5-cholestenoate                          | -0.06                | 0.08               | -0.38              | 0.08             |
| Metabolites      | C-glycosyltryptophan                                   | 0.23                 | 0.08               | 0.03               | 0.08             |
| Metabolites      | arabitol/xylitol                                       | 0.28                 | 0.06               | 0.45               | 0.09             |
| Metabolites      | N-acetylglucosamine/N-acetylgalactosamine              | 0.35                 | 0.11               | 0.05               | 0.1              |
| Metabolites      | adipoylcarnitine (C6-DC)                               | -0.26                | 0.08               | -0.08              | 0.09             |
| Metabolites      | nonanoylcarnitine (C9)                                 | 0                    | 0.08               | -0.2               | 0.09             |
| Metabolites      | glycochenodeoxycholate 3-sulfate                       | -0.07                | 0.08               | -0.2               | 0.09             |
| Metabolites      | glycodeoxycholate 3-sulfate                            | -0.01                | 0.06               | 0.05               | 0.07             |
| Metabolites      | linoleoyl ethanolamide                                 | -0.11                | 0.08               | -0.04              | 0.08             |
| Metabolites      | 1-(1-enyl-stearoyl)-2-oleoyl-GPE (P-18:0/18:1)         | -0.02                | 0.06               | -0.12              | 0.07             |
| Metabolites      | sphingomyelin (d18:1/17:0, d17:1/18:0, d19:1/16:0)     | 0.11                 | 0.04               | 0.14               | 0.04             |
| Metabolites      | 1-palmitoyl-2-stearoyl-GPC (16:0/18:0)                 | -0.08                | 0.06               | -0.13              | 0.06             |
| Metabolites      | 2-hydroxybutyrate/2-hydroxyisobutyrate                 | 0.14                 | 0.05               | 0.25               | 0.06             |
| Metabolites      | oleate/vaccenate (18:1)                                | 0.06                 | 0.03               | -0.06              | 0.03             |
| Metabolites      | leucylphenylalanine/isoleucylphenylalanine             | 0.05                 | 0.1                | -0.29              | 0.1              |
| Metabolites      | tricosanoyl sphingomyelin (d18:1/23:0)*                | 0.18                 | 0.04               | -0.17              | 0.05             |
| Metabolites      | sphingomyelin (d18:2/23:0, d18:1/23:1, d17:1/24:1)*    | 0.23                 | 0.04               | 0.07               | 0.05             |
| Metabolites      | sphingomyelin (d18:2/24:1, d18:1/24:2)*                | -0.05                | 0.04               | -0.16              | 0.05             |
| Metabolites      | 1-stearoyl-2-linoleoyl-GPE (18:0/18:2)*                | -0.12                | 0.03               | -0.04              | 0.04             |
| Metabolites      | 1-stearoyl-2-arachidonoyl-GPE (18:0/20:4)              | -0.1                 | 0.04               | -0.05              | 0.05             |
| Metabolites      | 1-palmitoyl-2-palmitoleoyl-GPC (16:0/16:1)*            | 0.19                 | 0.04               | -0.03              | 0.05             |
| Metabolites      | 1-palmitoyl-2-arachidonoyl-GPE (16:0/20:4)*            | -0.1                 | 0.04               | -0.09              | 0.05             |
| Metabolites      | 1-palmitoyl-2-arachidonoyl-GPI (16:0/20:4)*            | -0.07                | 0.06               | -0.07              | 0.06             |
| Metabolites      | 1-(1-enyl-palmitoyl)-2-arachidonoyl-GPE (P-16:0/20:4)* | 0.04                 | 0.05               | -0.26              | 0.06             |
| Metabolites      | 1-(1-enyl-palmitoyl)-2-oleoyl-GPE (P-16:0/18:1)*       | -0.11                | 0.05               | -0.24              | 0.05             |
| Metabolites      | sphingomyelin (d18:1/21:0, d17:1/22:0, d16:1/23:0)*    | 0.2                  | 0.04               | 0.16               | 0.05             |

| <b>Data type</b> | <b>Variable Name</b>                                   | <b>Female (Mean)</b> | <b>Female (SD)</b> | <b>Male (Mean)</b> | <b>Male (SD)</b> |
|------------------|--------------------------------------------------------|----------------------|--------------------|--------------------|------------------|
| Metabolites      | behenoyl dihydro sphingomyelin (d18:0/22:0)*           | -0.17                | 0.05               | -0.16              | 0.05             |
| Metabolites      | sphingomyelin (d18:0/18:0, d19:0/17:0)*                | -0.16                | 0.04               | -0.09              | 0.04             |
| Metabolites      | N-palmitoyl-sphinganine (d18:0/16:0)                   | -0.32                | 0.06               | 0.03               | 0.07             |
| Metabolites      | 1-margaroyl-2-oleoyl-GPC (17:0/18:1)*                  | 0.21                 | 0.05               | 0.01               | 0.07             |
| Metabolites      | myristoyl dihydro sphingomyelin (d18:0/14:0)*          | -0.2                 | 0.05               | 0                  | 0.05             |
| Metabolites      | 1-stearoyl-2-dihomo-linolenoyl-GPC (18:0/20:3n3 or 6)* | 0.16                 | 0.04               | 0.01               | 0.05             |
| Metabolites      | palmitoyl-linoleoyl-glycerol (16:0/18:2) [1]*          | -0.06                | 0.08               | -0.13              | 0.06             |
| Metabolites      | palmitoyl-linoleoyl-glycerol (16:0/18:2) [2]*          | -0.16                | 0.05               | -0.08              | 0.05             |
| Metabolites      | 1-palmitoyl-2-oleoyl-GPI (16:0/18:1)*                  | -0.42                | 0.05               | -0.15              | 0.06             |
| Metabolites      | 1-oleoyl-2-linoleoyl-GPE (18:1/18:2)*                  | -0.11                | 0.04               | -0.19              | 0.06             |
| Metabolites      | 1-arachidoyl-2-arachidonoyl-GPC (20:0/20:4)*           | 0.02                 | 0.05               | 0.09               | 0.07             |
| Metabolites      | 1-myristoyl-2-arachidonoyl-GPC (14:0/20:4)*            | 0.1                  | 0.05               | -0.04              | 0.05             |
| Metabolites      | 1-oleoyl-2-dihomo-linolenoyl-GPC (18:1/20:3)*          | 0.06                 | 0.07               | -0.06              | 0.09             |
| Metabolites      | 1-(1-enyl-palmitoyl)-2-palmitoleoyl-GPC (P-16:0/16:1)* | -0.16                | 0.06               | -0.09              | 0.09             |
| Metabolites      | 1-(1-enyl-palmitoyl)-2-myristoyl-GPC (P-16:0/14:0)*    | -0.3                 | 0.09               | 0.07               | 0.09             |
| Metabolites      | phosphatidylcholine (16:0/22:5n3, 18:1/20:4)*          | 0.07                 | 0.09               | 0.11               | 0.1              |
| Metabolites      | 1-stearoyl-2-oleoyl-GPI (18:0/18:1)*                   | -0.4                 | 0.06               | -0.06              | 0.07             |
| Metabolites      | 1-stearoyl-2-dihomo-linolenoyl-GPI (18:0/20:3n3 or 6)* | 0.16                 | 0.05               | 0.14               | 0.06             |
| Metabolites      | 1-palmitoyl-2-eicosapentaenoyl-GPE (16:0/20:5)*        | 0.27                 | 0.08               | 0.08               | 0.09             |
| Metabolites      | 1-stearoyl-2-dihomo-linolenoyl-GPE (18:0/20:3n3 or 6)* | -0.01                | 0.04               | 0.08               | 0.04             |
| Metabolites      | thioproline                                            | 0.32                 | 0.09               | 0.13               | 0.08             |
| Metabolites      | palmitoylcholine                                       | -0.02                | 0.04               | -0.05              | 0.04             |
| Metabolites      | glycochenodeoxycholate glucuronide (1)                 | -0.06                | 0.07               | -0.07              | 0.07             |
| Metabolites      | (S)-3-hydroxybutyrylcarnitine                          | 0.18                 | 0.08               | 0.27               | 0.07             |
| Metabolites      | glycosyl-N-palmitoyl-sphingosine (d18:1/16:0)          | -0.3                 | 0.08               | -0.04              | 0.07             |
| Metabolites      | oleoylcholine                                          | 0.01                 | 0.04               | -0.07              | 0.04             |
| Metabolites      | arachidonoylcholine                                    | 0                    | 0.04               | -0.15              | 0.05             |
| Metabolites      | docosahexaenoylcholine                                 | 0.08                 | 0.06               | 0.09               | 0.07             |
| Metabolites      | 1-palmitoleoyl-2-linolenoyl-GPC (16:1/18:3)*           | 0.05                 | 0.06               | 0.01               | 0.07             |
| Metabolites      | phosphatidylcholine (14:0/14:0, 16:0/12:0)             | -0.1                 | 0.05               | 0.02               | 0.07             |
| Metabolites      | phosphatidylcholine (15:0/18:1, 17:0/16:1, 16:0/17:1)* | 0.16                 | 0.04               | -0.08              | 0.06             |
| Metabolites      | 1-oleoyl-2-dihomo-linoleoyl-GPC (18:1/20:2)*           | -0.12                | 0.09               | -0.02              | 0.1              |
| Metabolites      | phosphatidylcholine (18:0/20:2, 20:0/18:2)*            | 0.1                  | 0.05               | 0.34               | 0.06             |

| Data type   | Variable Name                                               | Female (Mean) | Female (SD) | Male (Mean) | Male (SD) |
|-------------|-------------------------------------------------------------|---------------|-------------|-------------|-----------|
| Metabolites | 1-(1-enyl-stearoyl)-2-dihomo-linolenoyl-GPE (P-18:0/20:3)*  | 0.36          | 0.06        | 0.12        | 0.07      |
| Metabolites | hexadecadienoate (16:2n6)                                   | 0.12          | 0.06        | 0.04        | 0.06      |
| Metabolites | palmitoleoylcarnitine (C16:1)*                              | 0.3           | 0.04        | 0.42        | 0.04      |
| Metabolites | 4-hydroxyphenylacetylglutamine                              | 0.14          | 0.1         | 0.3         | 0.09      |
| Metabolites | 2,3-dihydroxy-2-methylbutyrate                              | -0.1          | 0.1         | -0.14       | 0.09      |
| Metabolites | 2'-O-methyluridine                                          | 0.34          | 0.11        | 0           | 0.12      |
| Metabolites | gamma-glutamyl-alpha-lysine                                 | 0.09          | 0.06        | -0.19       | 0.07      |
| Metabolites | palmitoyl-oleoyl-glycerol (16:0/18:1) [1]*                  | -0.06         | 0.05        | -0.02       | 0.05      |
| Metabolites | palmitoyl-oleoyl-glycerol (16:0/18:1) [2]*                  | -0.11         | 0.04        | -0.12       | 0.05      |
| Metabolites | oleoyl-oleoyl-glycerol (18:1/18:1) [1]*                     | 0.11          | 0.04        | -0.06       | 0.04      |
| Metabolites | oleoyl-oleoyl-glycerol (18:1/18:1) [2]*                     | 0.11          | 0.04        | -0.16       | 0.06      |
| Metabolites | linoleoyl-arachidonoyl-glycerol (18:2/20:4) [1]*            | 0.1           | 0.05        | -0.08       | 0.05      |
| Metabolites | palmitoyl-arachidonoyl-glycerol (16:0/20:4) [2]*            | -0.25         | 0.06        | -0.12       | 0.08      |
| Metabolites | linoleoyl-linolenoyl-glycerol (18:2/18:3) [2]*              | 0.07          | 0.07        | -0.14       | 0.06      |
| Metabolites | palmitoleoyl-linoleoyl-glycerol (16:1/18:2) [1]*            | -0.03         | 0.05        | -0.08       | 0.05      |
| Metabolites | oleoyl-arachidonoyl-glycerol (18:1/20:4) [1]*               | 0.27          | 0.05        | -0.05       | 0.06      |
| Metabolites | oleoyl-arachidonoyl-glycerol (18:1/20:4) [2]*               | 0.27          | 0.05        | -0.05       | 0.05      |
| Metabolites | diacylglycerol (16:1/18:2 [2], 16:0/18:3 [1])*              | -0.11         | 0.05        | -0.03       | 0.05      |
| Metabolites | stearoyl-arachidonoyl-glycerol (18:0/20:4) [1]*             | 0.11          | 0.06        | -0.05       | 0.07      |
| Metabolites | stearoyl-arachidonoyl-glycerol (18:0/20:4) [2]*             | -0.09         | 0.08        | -0.06       | 0.1       |
| Metabolites | perfluorooctanesulfonate (PFOS)                             | 0.78          | 0.09        | 0.91        | 0.09      |
| Metabolites | 1-stearoyl-2-docosapentaenoyl-GPE (18:0/22:5n6)*            | -0.21         | 0.06        | 0.12        | 0.08      |
| Metabolites | 1-(1-enyl-stearoyl)-2-docosapentaenoyl-GPE (P-18:0/22:5n3)* | 0.08          | 0.07        | -0.02       | 0.08      |
| Metabolites | palmitoyl-docosahexaenoyl-glycerol (16:0/22:6) [1]*         | 0.02          | 0.07        | 0.38        | 0.07      |
| Metabolites | lactosyl-N-nervonoyl-sphingosine (d18:1/24:1)*              | -0.03         | 0.07        | -0.09       | 0.1       |
| Metabolites | N-behenoyl-sphingadienine (d18:2/22:0)*                     | 0.18          | 0.05        | 0.16        | 0.07      |
| Metabolites | myristoyl-linoleoyl-glycerol (14:0/18:2) [1]*               | 0.14          | 0.06        | -0.24       | 0.06      |
| Metabolites | 1-palmitoyl-2-(hydroxylinoleoyl)-GPC (16:0/18:2(OH))*       | -0.37         | 0.08        | 0.2         | 0.08      |
| Metabolites | ceramide (d16:1/24:1, d18:1/22:1)*                          | -0.08         | 0.06        | 0.18        | 0.07      |
| Metabolites | ceramide (d18:1/14:0, d16:1/16:0)*                          | 0.1           | 0.08        | 0.18        | 0.08      |
| Metabolites | ceramide (d18:1/17:0, d17:1/18:0)*                          | -0.07         | 0.05        | -0.01       | 0.07      |
| Metabolites | ceramide (d18:2/24:1, d18:1/24:2)*                          | -0.03         | 0.04        | 0.09        | 0.05      |
| Metabolites | glycosyl ceramide (d18:2/24:1, d18:1/24:2)*                 | -0.28         | 0.05        | 0.01        | 0.06      |
| Metabolites | ceramide (d18:1/20:0, d16:1/22:0, d20:1/18:0)*              | 0.13          | 0.04        | 0.3         | 0.04      |
| Metabolites | stearoylcholine*                                            | -0.1          | 0.04        | -0.08       | 0.04      |

| <b>Data type</b> | <b>Variable Name</b>                                            | <b>Female (Mean)</b> | <b>Female (SD)</b> | <b>Male (Mean)</b> | <b>Male (SD)</b> |
|------------------|-----------------------------------------------------------------|----------------------|--------------------|--------------------|------------------|
| Metabolites      | sphingomyelin (d18:0/20:0, d16:0/22:0)*                         | -0.16                | 0.05               | -0.13              | 0.05             |
| Metabolites      | sphingomyelin (d18:1/19:0, d19:1/18:0)*                         | 0.1                  | 0.04               | 0.26               | 0.04             |
| Metabolites      | sphingomyelin (d18:2/21:0, d16:2/23:0)*                         | 0.3                  | 0.05               | 0.18               | 0.04             |
| Metabolites      | sphingomyelin (d18:2/23:1)*                                     | 0.03                 | 0.04               | -0.08              | 0.05             |
| Metabolites      | sphingomyelin (d18:1/25:0, d19:0/24:1, d20:1/23:0, d19:1/24:0)* | -0.06                | 0.06               | -0.16              | 0.07             |
| Metabolites      | sphingomyelin (d17:2/16:0, d18:2/15:0)*                         | 0.3                  | 0.05               | 0.14               | 0.06             |
| Metabolites      | behenoylcarnitine (C22)*                                        | 0.13                 | 0.07               | 0.09               | 0.06             |
| Metabolites      | arachidoylcarnitine (C20)*                                      | 0.71                 | 0.07               | 0.52               | 0.06             |
| Metabolites      | cerotoylcarnitine (C26)*                                        | 0.13                 | 0.06               | -0.08              | 0.07             |
| Metabolites      | ximenoylcarnitine (C26:1)*                                      | 0.09                 | 0.06               | -0.03              | 0.08             |
| Metabolites      | arachidonoylcarnitine (C20:4)                                   | 0.09                 | 0.06               | -0.3               | 0.06             |
| Metabolites      | eicosenoylcarnitine (C20:1)*                                    | 0.56                 | 0.06               | 0.47               | 0.05             |
| Metabolites      | dihomo-linoleoylcarnitine (C20:2)*                              | 0.11                 | 0.05               | 0.08               | 0.05             |
| Metabolites      | dihomo-linolenoylcarnitine (C20:3n3 or 6)*                      | -0.19                | 0.07               | -0.15              | 0.07             |
| Metabolites      | docosahexaenoylcarnitine (C22:6)*                               | 0.07                 | 0.09               | 0.4                | 0.08             |
| Metabolites      | nervonoylcarnitine (C24:1)*                                     | 0.12                 | 0.06               | 0.13               | 0.07             |
| Metabolites      | N,N,N-trimethyl-5-aminovalerate                                 | 0.48                 | 0.08               | 0.03               | 0.09             |
| Metabolites      | cortolone glucuronide (1)                                       | 0.35                 | 0.09               | 0.28               | 0.08             |
| Metabolites      | (N(1) + N(8))-acetylspermidine                                  | -0.13                | 0.08               | -0.16              | 0.1              |
| Metabolites      | 5-dodecenoylcarnitine (C12:1)                                   | -0.27                | 0.06               | -0.26              | 0.07             |
| Metabolites      | trans-2-hexenoylglycine                                         | 0.39                 | 0.08               | -0.12              | 0.09             |
| Metabolites      | dodecenedioate (C12:1-DC)*                                      | 0.14                 | 0.07               | 0.06               | 0.07             |
| Metabolites      | hexadecenedioate (C16:1-DC)*                                    | 0.07                 | 0.05               | -0.21              | 0.06             |
| Metabolites      | octadecenedioate (C18:1-DC)*                                    | 0.04                 | 0.05               | -0.05              | 0.06             |
| Metabolites      | octadecadienedioate (C18:2-DC)*                                 | -0.18                | 0.08               | 0.02               | 0.09             |
| Metabolites      | N-acetyl-2-aminooctanoate*                                      | -0.13                | 0.06               | -0.16              | 0.07             |
| Metabolites      | hydroxyasparagine**                                             | 0.32                 | 0.05               | 0.63               | 0.07             |
| Metabolites      | perfluorooctanoate (PFOA)                                       | 0.93                 | 0.08               | -0.06              | 0.12             |
| Metabolites      | glyco-beta-muricholate**                                        | -0.37                | 0.08               | -0.5               | 0.1              |
| Metabolites      | 3-formylindole                                                  | -0.36                | 0.07               | -0.28              | 0.1              |
| Metabolites      | pyroglutamylleucine*                                            | -0.43                | 0.09               | 0.05               | 0.08             |
| Metabolites      | gamma-glutamylcitrulline*                                       | -0.07                | 0.07               | 0.02               | 0.07             |
| Metabolites      | glycine conjugate of C10H12O2*                                  | -0.09                | 0.09               | -0.5               | 0.08             |
| Metabolites      | glycine conjugate of C10H14O2 (1)*                              | 0.19                 | 0.07               | -0.04              | 0.07             |
| Metabolites      | tetradecadienoate (14:2)*                                       | 0.04                 | 0.05               | -0.07              | 0.05             |
| Metabolites      | 3-amino-2-piperidone                                            | 0.49                 | 0.08               | 0.4                | 0.09             |
| Metabolites      | N,N-dimethylalanine                                             | -0.28                | 0.08               | -0.26              | 0.13             |
| Metabolites      | 6-bromotryptophan                                               | -0.25                | 0.08               | -0.36              | 0.1              |
| Metabolites      | 1-carboxyethylphenylalanine                                     | 0.18                 | 0.05               | 0.25               | 0.05             |
| Metabolites      | 1-carboxyethylvaline                                            | 0.53                 | 0.07               | 0.33               | 0.08             |
| Metabolites      | 1-carboxyethylleucine                                           | 0.34                 | 0.08               | 0.02               | 0.06             |
| Metabolites      | N-acetyl-isoputranine                                           | 0.25                 | 0.07               | 0.17               | 0.09             |

| <b>Data type</b> | <b>Variable Name</b>                              | <b>Female (Mean)</b> | <b>Female (SD)</b> | <b>Male (Mean)</b> | <b>Male (SD)</b> |
|------------------|---------------------------------------------------|----------------------|--------------------|--------------------|------------------|
| Metabolites      | glucuronide of piperine metabolite C17H21NO3 (3)* | -0.11                | 0.05               | 0.02               | 0.06             |
| Metabolites      | glucuronide of piperine metabolite C17H21NO3 (4)* | 0.1                  | 0.05               | -0.03              | 0.05             |
| Metabolites      | glucuronide of piperine metabolite C17H21NO3 (5)* | -0.01                | 0.06               | 0.02               | 0.06             |
| Metabolites      | sulfate of piperine metabolite C16H19NO3 (2)*     | -0.07                | 0.04               | 0.18               | 0.06             |
| Metabolites      | sulfate of piperine metabolite C16H19NO3 (3)*     | -0.03                | 0.05               | 0.06               | 0.06             |
| Metabolites      | sulfate of piperine metabolite C18H21NO3 (1)*     | -0.18                | 0.07               | -0.12              | 0.09             |
| Metabolites      | 2-naphthol sulfate                                | -0.19                | 0.09               | -0.12              | 0.11             |
| Metabolites      | 4-ethylcatechol sulfate                           | -0.22                | 0.09               | 0.04               | 0.08             |
| Metabolites      | lithocholate sulfate (1)                          | 0.3                  | 0.1                | 0.24               | 0.12             |
| Metabolites      | 2,3-dihydroxy-5-methylthio-4-pentenoate (DMTPA)*  | 0.24                 | 0.04               | 0.41               | 0.05             |
| Metabolites      | branched-chain fatty acid 18:0 (2)**              | 0.06                 | 0.09               | -0.18              | 0.1              |
| Metabolites      | tetradecadienedioate (C14:2-DC)*                  | -0.15                | 0.07               | -0.23              | 0.09             |
| Metabolites      | pregnenetriol disulfate*                          | 0.01                 | 0.06               | -0.15              | 0.07             |
| Metabolites      | hydroxy-N6,N6,N6-trimethyllysine*                 | 0.11                 | 0.07               | -0.01              | 0.09             |
| Metabolites      | metabolonic lactone sulfate                       | -0.01                | 0.08               | 0.12               | 0.08             |
| Metabolites      | trans-4-hydroxyproline                            | -0.67                | 0.09               | -0.27              | 0.08             |
| Metabolites      | allantoin                                         | -0.37                | 0.08               | -0.34              | 0.09             |
| Metabolites      | xanthine                                          | 0.27                 | 0.08               | -0.11              | 0.09             |
| Metabolites      | 5-oxoproline                                      | 0.29                 | 0.08               | 0.24               | 0.09             |
| Metabolites      | picolinate                                        | -0.03                | 0.09               | 0.03               | 0.1              |
| Metabolites      | sarcosine                                         | -0.13                | 0.05               | -0.01              | 0.08             |
| Metabolites      | pipecolate                                        | -0.2                 | 0.09               | -0.24              | 0.1              |
| Metabolites      | phosphoethanolamine                               | -0.25                | 0.04               | -0.2               | 0.04             |
| Metabolites      | N-acetylleucine                                   | -0.05                | 0.06               | 0.14               | 0.07             |
| Metabolites      | N-acetylmethionine                                | -0.54                | 0.07               | 0.11               | 0.06             |
| Metabolites      | N-acetylvaline                                    | 0.18                 | 0.07               | 0.34               | 0.06             |
| Metabolites      | erucate (22:1n9)                                  | -0.02                | 0.07               | 0.15               | 0.07             |
| Metabolites      | bilirubin (Z,Z)                                   | -0.02                | 0.05               | -0.04              | 0.07             |
| Metabolites      | thyroxine                                         | 0.05                 | 0.11               | -0.22              | 0.09             |
| Metabolites      | gamma-glutamyltyrosine                            | 0.45                 | 0.06               | 0.41               | 0.07             |
| Metabolites      | 3-hydroxyisobutyrate                              | -0.38                | 0.08               | -0.24              | 0.08             |
| Metabolites      | N-acetylalanine                                   | -0.05                | 0.05               | 0.01               | 0.06             |
| Metabolites      | vanillylmandelate (VMA)                           | 1.15                 | 0.08               | 0.99               | 0.09             |
| Metabolites      | 4-acetamidobutanoate                              | 0.53                 | 0.07               | 0.19               | 0.07             |
| Metabolites      | 3-aminoisobutyrate                                | -0.39                | 0.09               | 0.3                | 0.08             |
| Metabolites      | 3-hydroxy-3-methylglutarate                       | 0.11                 | 0.09               | 0.09               | 0.1              |
| Metabolites      | citrate                                           | 0.51                 | 0.07               | 0.41               | 0.07             |
| Metabolites      | 2-aminobutyrate                                   | 0.08                 | 0.05               | 0.15               | 0.08             |

| <b>Data type</b> | <b>Variable Name</b>                    | <b>Female (Mean)</b> | <b>Female (SD)</b> | <b>Male (Mean)</b> | <b>Male (SD)</b> |
|------------------|-----------------------------------------|----------------------|--------------------|--------------------|------------------|
| Metabolites      | urate                                   | -0.28                | 0.06               | -0.69              | 0.1              |
| Metabolites      | ursodeoxycholate                        | -0.01                | 0.06               | -0.19              | 0.07             |
| Metabolites      | oleoyl ethanolamide                     | 0.07                 | 0.06               | -0.02              | 0.07             |
| Metabolites      | gamma-glutamylglutamine                 | -0.28                | 0.06               | 0.08               | 0.07             |
| Metabolites      | 4-hydroxyphenylpyruvate                 | 0.12                 | 0.07               | 0.08               | 0.11             |
| Metabolites      | N-acetylneuraminate                     | -0.07                | 0.1                | 0.12               | 0.07             |
| Metabolites      | creatine                                | 0.25                 | 0.06               | 0.24               | 0.07             |
| Metabolites      | cys-gly, oxidized                       | -0.54                | 0.07               | -0.54              | 0.08             |
| Metabolites      | dihomo-linoleate (20:2n6)               | -0.12                | 0.03               | -0.02              | 0.04             |
| Metabolites      | gamma-glutamylhistidine                 | -0.01                | 0.08               | -0.35              | 0.1              |
| Metabolites      | 2-hydroxystearate                       | 0.15                 | 0.06               | 0.21               | 0.06             |
| Metabolites      | N1-methyladenosine                      | 0.27                 | 0.07               | 0.13               | 0.08             |
| Metabolites      | glycerol                                | -0.04                | 0.07               | 0.09               | 0.09             |
| Metabolites      | choline                                 | -0.27                | 0.07               | 0.47               | 0.07             |
| Metabolites      | gamma-glutamylleucine                   | 0                    | 0.06               | 0.02               | 0.07             |
| Metabolites      | 3-phosphoglycerate                      | 0.1                  | 0.08               | 0.18               | 0.08             |
| Metabolites      | 3-methoxytyrosine                       | -0.36                | 0.08               | -0.32              | 0.07             |
| Metabolites      | cholate                                 | 0.33                 | 0.09               | 0.46               | 0.1              |
| Metabolites      | beta-hydroxyisovalerate                 | -0.29                | 0.09               | -0.47              | 0.08             |
| Metabolites      | palmitoyl ethanolamide                  | -0.17                | 0.07               | -0.16              | 0.07             |
| Metabolites      | N-palmitoyl-sphingosine (d18:1/16:0)    | 0.09                 | 0.06               | -0.11              | 0.06             |
| Metabolites      | 1-palmitoyl-2-oleoyl-GPE (16:0/18:1)    | -0.09                | 0.03               | 0.01               | 0.05             |
| Metabolites      | 1-palmitoyl-2-linoleoyl-GPI (16:0/18:2) | -0.38                | 0.06               | -0.22              | 0.06             |
| Metabolites      | stearoyl sphingomyelin (d18:1/18:0)     | 0.03                 | 0.05               | 0.05               | 0.05             |
| Metabolites      | 1-palmitoyl-2-oleoyl-GPC (16:0/18:1)    | 0.25                 | 0.04               | 0.01               | 0.06             |
| Metabolites      | N-stearoyl-sphingosine (d18:1/18:0)*    | -0.09                | 0.04               | 0.09               | 0.04             |
| Metabolites      | 5,6-dihydrothymine                      | 0.22                 | 0.08               | 0.09               | 0.11             |
| Metabolites      | glycochenodeoxycholate                  | 0.04                 | 0.06               | -0.16              | 0.06             |
| Metabolites      | taurochenodeoxycholate                  | 0.01                 | 0.05               | -0.08              | 0.06             |
| Metabolites      | taurocholate                            | -0.03                | 0.07               | 0.08               | 0.08             |
| Metabolites      | taurodeoxycholate                       | -0.1                 | 0.06               | 0.05               | 0.07             |
| Metabolites      | hypoxanthine                            | -0.03                | 0.08               | -0.34              | 0.09             |
| Metabolites      | 9,10-DiHOME                             | -0.33                | 0.09               | -0.08              | 0.09             |
| Metabolites      | linoleate (18:2n6)                      | -0.02                | 0.03               | -0.09              | 0.04             |
| Metabolites      | laurate (12:0)                          | 0.03                 | 0.06               | -0.16              | 0.06             |
| Metabolites      | quinolate                               | 0.03                 | 0.09               | 0.09               | 0.08             |
| Metabolites      | N6,N6,N6-trimethyllysine                | -0.08                | 0.08               | -0.09              | 0.08             |
| Metabolites      | N-acetylputrescine                      | -0.05                | 0.07               | 0.01               | 0.08             |
| Metabolites      | N-formylmethionine                      | 0.36                 | 0.06               | 0.26               | 0.06             |
| Metabolites      | S-adenosylhomocysteine (SAH)            | 0.23                 | 0.07               | -0.16              | 0.11             |
| Metabolites      | methylsuccinate                         | 0.22                 | 0.1                | -0.07              | 0.09             |
| Metabolites      | ethylmalonate                           | -0.05                | 0.06               | -0.03              | 0.06             |
| Metabolites      | adenosine 5'-monophosphate (AMP)        | 0.03                 | 0.06               | -0.21              | 0.06             |



| <b>Data type</b> | <b>Variable Name</b>        | <b>Female (Mean)</b> | <b>Female (SD)</b> | <b>Male (Mean)</b> | <b>Male (SD)</b> |
|------------------|-----------------------------|----------------------|--------------------|--------------------|------------------|
| Metabolites      | 5-methylthioadenosine (MTA) | -0.24                | 0.07               | -0.12              | 0.08             |
| Metabolites      | arginine                    | -0.15                | 0.08               | 0.13               | 0.11             |
| Metabolites      | aspartate                   | -0.29                | 0.07               | 0.12               | 0.07             |
| Metabolites      | 3-(4-hydroxyphenyl)lactate  | 0.06                 | 0.06               | 0.18               | 0.06             |
| Metabolites      | phenylpyruvate              | -0.54                | 0.08               | -0.48              | 0.1              |
| Metabolites      | beta-alanine                | -0.01                | 0.09               | 0.07               | 0.1              |
| Metabolites      | biliverdin                  | 0.11                 | 0.05               | -0.04              | 0.06             |
| Metabolites      | succinate                   | 0.22                 | 0.09               | -0.03              | 0.1              |
| Metabolites      | 3-hydroxybutyrate (BHBA)    | 0.1                  | 0.05               | -0.06              | 0.05             |
| Metabolites      | cholesterol                 | 0.25                 | 0.09               | 0.12               | 0.11             |
| Metabolites      | choline phosphate           | -0.33                | 0.07               | -0.48              | 0.07             |
| Metabolites      | cortisone                   | 0.08                 | 0.08               | 0.09               | 0.09             |
| Metabolites      | creatinine                  | -0.59                | 0.06               | -0.33              | 0.07             |
| Metabolites      | cysteinylglycine            | -0.45                | 0.07               | -0.69              | 0.08             |
| Metabolites      | cystine                     | 0.73                 | 0.08               | 0.33               | 0.08             |
| Metabolites      | sphingosine                 | -0.05                | 0.05               | 0.01               | 0.05             |
| Metabolites      | deoxycholate                | -0.12                | 0.09               | -0.01              | 0.09             |
| Metabolites      | sphinganine                 | 0.08                 | 0.05               | 0.18               | 0.05             |
| Metabolites      | fumarate                    | -0.27                | 0.06               | 0.04               | 0.07             |
| Metabolites      | gamma-glutamylglutamate     | 0.21                 | 0.07               | -0.06              | 0.09             |
| Metabolites      | gluconate                   | 0.16                 | 0.09               | -0.34              | 0.07             |
| Metabolites      | glutarate (C5-DC)           | -0.11                | 0.06               | -0.24              | 0.08             |
| Metabolites      | glycine                     | -0.09                | 0.04               | -0.17              | 0.07             |
| Metabolites      | glycocholate                | 0                    | 0.04               | -0.16              | 0.05             |
| Metabolites      | guanidinoacetate            | 0.14                 | 0.07               | 0.02               | 0.08             |
| Metabolites      | S-1-pyrroline-5-carboxylate | 0.28                 | 0.09               | -0.11              | 0.09             |
| Metabolites      | histidine                   | 0.06                 | 0.07               | -0.15              | 0.08             |
| Metabolites      | cortisol                    | 0.11                 | 0.07               | 0.31               | 0.08             |
| Metabolites      | hypotaurine                 | 0.23                 | 0.09               | 0.34               | 0.09             |
| Metabolites      | inosine                     | -0.11                | 0.07               | -0.26              | 0.07             |
| Metabolites      | myo-inositol                | 0.13                 | 0.1                | 0.32               | 0.08             |
| Metabolites      | isoleucine                  | -0.3                 | 0.05               | -0.06              | 0.05             |
| Metabolites      | citrulline                  | 0.36                 | 0.08               | 0.47               | 0.1              |
| Metabolites      | leucine                     | -0.07                | 0.05               | 0.04               | 0.05             |
| Metabolites      | lysine                      | 0.23                 | 0.06               | -0.02              | 0.08             |
| Metabolites      | malate                      | -0.05                | 0.06               | -0.04              | 0.06             |
| Metabolites      | methionine                  | 0.1                  | 0.06               | -0.12              | 0.06             |
| Metabolites      | palmitate (16:0)            | -0.04                | 0.03               | -0.01              | 0.03             |
| Metabolites      | nicotinamide                | -0.32                | 0.05               | 0.01               | 0.07             |
| Metabolites      | stearate (18:0)             | 0.08                 | 0.04               | 0                  | 0.05             |
| Metabolites      | ornithine                   | 0.46                 | 0.05               | 0.29               | 0.08             |
| Metabolites      | orotate                     | -0.2                 | 0.09               | -0.05              | 0.11             |
| Metabolites      | palmitoleate (16:1n7)       | -0.01                | 0.04               | 0                  | 0.04             |

| <b>Data type</b> | <b>Variable Name</b>                 | <b>Female (Mean)</b> | <b>Female (SD)</b> | <b>Male (Mean)</b> | <b>Male (SD)</b> |
|------------------|--------------------------------------|----------------------|--------------------|--------------------|------------------|
| Metabolites      | phenylalanine                        | 0.24                 | 0.06               | -0.06              | 0.07             |
| Metabolites      | phosphate                            | -0.24                | 0.08               | -0.29              | 0.08             |
| Metabolites      | proline                              | -0.21                | 0.08               | -0.23              | 0.09             |
| Metabolites      | lactate                              | -0.01                | 0.07               | 0.02               | 0.07             |
| Metabolites      | pyridoxal                            | 0.04                 | 0.09               | -0.08              | 0.1              |
| Metabolites      | retinol (Vitamin A)                  | 0.11                 | 0.07               | 0.07               | 0.08             |
| Metabolites      | spermidine                           | 0.16                 | 0.09               | 0.06               | 0.08             |
| Metabolites      | serine                               | -0.55                | 0.06               | -0.22              | 0.07             |
| Metabolites      | serotonin                            | -0.59                | 0.09               | 0.08               | 0.08             |
| Metabolites      | taurine                              | 0.07                 | 0.05               | -0.05              | 0.04             |
| Metabolites      | myristate (14:0)                     | -0.04                | 0.03               | -0.12              | 0.04             |
| Metabolites      | urea                                 | 0.41                 | 0.07               | 0.25               | 0.08             |
| Metabolites      | uridine                              | -0.07                | 0.08               | 0.1                | 0.07             |
| Metabolites      | trans-urocanate                      | -0.23                | 0.07               | -0.05              | 0.08             |
| Metabolites      | 1-methylnicotinamide                 | 0.07                 | 0.08               | 0.4                | 0.1              |
| Metabolites      | glutamate                            | 0                    | 0.06               | 0.1                | 0.06             |
| Metabolites      | glutamine                            | 0.33                 | 0.07               | 0.23               | 0.1              |
| Metabolites      | threonine                            | -0.27                | 0.07               | 0.2                | 0.06             |
| Metabolites      | tryptophan                           | -0.19                | 0.05               | -0.29              | 0.06             |
| Metabolites      | valine                               | 0.09                 | 0.05               | 0.1                | 0.06             |
| Metabolites      | glucose                              | 0.34                 | 0.07               | 0.39               | 0.08             |
| Metabolites      | 12,13-DiHOME                         | 0.05                 | 0.09               | -0.18              | 0.1              |
| Metabolites      | alpha-ketobutyrate                   | -0.17                | 0.07               | 0.22               | 0.07             |
| Metabolites      | adenosine                            | 0.25                 | 0.09               | -0.38              | 0.11             |
| Metabolites      | betaine                              | -0.23                | 0.07               | 0.23               | 0.09             |
| Metabolites      | cysteine                             | 0.18                 | 0.07               | -0.26              | 0.06             |
| Metabolites      | mannose                              | 0.05                 | 0.07               | 0.34               | 0.08             |
| Metabolites      | dimethylglycine                      | -0.06                | 0.09               | -0.12              | 0.11             |
| Metabolites      | alanine                              | 0.06                 | 0.07               | 0.31               | 0.07             |
| Metabolites      | tyrosine                             | 0.09                 | 0.06               | 0.51               | 0.08             |
| Metabolites      | pseudouridine                        | 0.03                 | 0.05               | 0.05               | 0.06             |
| Metabolites      | pyruvate                             | -0.16                | 0.05               | 0.05               | 0.07             |
| Metabolites      | uracil                               | 0.09                 | 0.09               | -0.42              | 0.09             |
| Metabolites      | caffeine                             | 0.06                 | 0.06               | -0.05              | 0.07             |
| Metabolites      | fructose                             | -0.12                | 0.09               | -0.18              | 0.1              |
| Metabolites      | adenine                              | -0.09                | 0.08               | -0.01              | 0.08             |
| Metabolites      | caprate (10:0)                       | 0.12                 | 0.05               | -0.02              | 0.05             |
| Metabolites      | margarate (17:0)                     | 0.07                 | 0.03               | -0.08              | 0.04             |
| Metabolites      | nonadecanoate (19:0)                 | 0.07                 | 0.04               | -0.02              | 0.04             |
| Metabolites      | arachidate (20:0)                    | -0.05                | 0.07               | -0.11              | 0.05             |
| Metabolites      | maltose                              | 0.05                 | 0.06               | -0.18              | 0.07             |
| Metabolites      | asparagine                           | 0                    | 0.07               | -0.15              | 0.08             |
| Metabolites      | N-stearoyl-sphinganine (d18:0/18:0)* | -0.32                | 0.06               | 0.06               | 0.05             |

| <b>Data type</b> | <b>Variable Name</b>  | <b>Female (Mean)</b> | <b>Female (SD)</b> | <b>Male (Mean)</b> | <b>Male (SD)</b> |
|------------------|-----------------------|----------------------|--------------------|--------------------|------------------|
| Metabolites      | alpha-ketoglutarate   | 0.08                 | 0.08               | 0.16               | 0.07             |
| Metabolites      | caprylate (8:0)       | -0.06                | 0.09               | -0.02              | 0.11             |
| Metabolites      | kynurenate            | -0.09                | 0.08               | 0.07               | 0.1              |
| Metabolites      | pentadecanoate (15:0) | 0.01                 | 0.04               | -0.04              | 0.04             |
| Metabolites      | V1                    | -0.49                | 0.07               | -0.5               | 0.08             |
| Metabolites      | V2                    | -0.12                | 0.08               | -0.4               | 0.09             |
| Metabolites      | V3                    | -0.26                | 0.06               | -0.31              | 0.09             |
| Metabolites      | V4                    | 0                    | 0.08               | -0.3               | 0.1              |
| Metabolites      | V5                    | 0.01                 | 0.09               | -0.12              | 0.1              |
| Metabolites      | V6                    | -0.26                | 0.1                | -0.13              | 0.12             |
| Metabolites      | V7                    | 0.24                 | 0.08               | 0.47               | 0.11             |

The proteins are labeled with the Olink panel and the corresponding Uniprot ID as reported by Olink (formatted as <Olink panel>\_<Uniprot>)

## Supplemental Table 5 – Dropped values and their reason for exclusion

| Modality      | Vendor  | Measurement                    | Reason for exclusion |
|---------------|---------|--------------------------------|----------------------|
| Clinical Labs | Labcorp | ARSENIC, BLOOD                 | Missing values > 20% |
| Clinical Labs | Labcorp | leptin                         | Missing values > 20% |
| Clinical Labs | Labcorp | zinc_plasma_or_serum           | Missing values > 20% |
| Clinical Labs | Labcorp | LARGE LDL PARTICLE NUMBER      | Missing values > 20% |
| Clinical Labs | Labcorp | HDL PARTICLE PERCENTILE        | Missing values > 20% |
| Clinical Labs | Labcorp | LARGE MED VLDL PARTICLE NUMBER | Missing values > 20% |
| Clinical Labs | Labcorp | IL-6                           | Missing values > 20% |
| Clinical Labs | Labcorp | IDL PARTICLE NUMBER            | Missing values > 20% |
| Clinical Labs | Labcorp | PAI-1 ANTIGEN, QNT             | Missing values > 20% |
| Clinical Labs | Labcorp | NEUTROPHIL, SEGS               | Missing values > 20% |
| Clinical Labs | Labcorp | HDL LARGE                      | Missing values > 20% |
| Clinical Labs | Labcorp | LACTIC DEHYDROGENASE           | Missing values > 20% |
| Clinical Labs | Labcorp | ZINC                           | Missing values > 20% |
| Clinical Labs | Labcorp | EPA/AA                         | Missing values > 20% |
| Clinical Labs | Labcorp | PLATELET COUNT                 | Missing values > 20% |
| Clinical Labs | Labcorp | IL-8                           | Missing values > 20% |
| Clinical Labs | Labcorp | SUPEROX DISMUT SOD             | Missing values > 20% |
| Clinical Labs | Labcorp | HDL SIZE PERCENTILE            | Missing values > 20% |
| Clinical Labs | Labcorp | LP_PLA2                        | Missing values > 20% |
| Clinical Labs | Labcorp | MANGANESE, SERUM               | Missing values > 20% |
| Clinical Labs | Labcorp | MEDIUM HDL PARTICLE NUMBER     | Missing values > 20% |
| Clinical Labs | Labcorp | MEDIUM VLDL PARTICLE NUMBER    | Missing values > 20% |
| Clinical Labs | Labcorp | LARGE VLDL PARTICLE PERCENTILE | Missing values > 20% |
| Clinical Labs | Labcorp | NEUTROPHILS ABSOLUTE           | Missing values > 20% |
| Clinical Labs | Labcorp | ANTIOXID CAP, TOTAL            | Missing values > 20% |
| Clinical Labs | Labcorp | PHOSPHORUS INORGANIC           | Missing values > 20% |
| Clinical Labs | Labcorp | VLDL SIZE PERCENTILE           | Missing values > 20% |
| Clinical Labs | Labcorp | LPIR SCORE PERCENTILE          | Missing values > 20% |
| Clinical Labs | Labcorp | SMALL VLDL PARTICLE NUMBER     | Missing values > 20% |
| Clinical Labs | Labcorp | BILIRUBIN, INDIRECT            | Missing values > 20% |
| Clinical Labs | Labcorp | LDL SIZE PERCENTILE            | Missing values > 20% |
| Clinical Labs | Labcorp | LDL PEAK SIZE                  | Missing values > 20% |
| Clinical Labs | Labcorp | PROTEIN                        | Missing values > 20% |
| Clinical Labs | Labcorp | LARGE HDL PARTICLE PERCENTILE  | Missing values > 20% |
| Clinical Labs | Labcorp | GLUTATHIONE, TOTAL             | Missing values > 20% |
| Clinical Labs | Labcorp | SMALL LDL PARTICLE PERCENTILE  | Missing values > 20% |
| Clinical Labs | Labcorp | LARGE MED HDL PARTICLE NUMBER  | Missing values > 20% |
| Clinical Labs | Labcorp | VLDL PARTICLE NUMBER           | Missing values > 20% |
| Clinical Labs | Labcorp | VLDL LDL PARTICLE NUMBER       | Missing values > 20% |
| Clinical Labs | Labcorp | COPPER, RBC                    | Missing values > 20% |
| Clinical Labs | Labcorp | VITAMIN D3, 25-OH              | Missing values > 20% |
| Clinical Labs | Labcorp | ZINC, RBC                      | Missing values > 20% |

| <b>Modality</b> | <b>Vendor</b> | <b>Measurement</b>        | <b>Reason for exclusion</b> |
|-----------------|---------------|---------------------------|-----------------------------|
| Clinical Labs   | Labcorp       | SELENIUM, SERUM           | Missing values > 20%        |
| Clinical Labs   | Labcorp       | QUICKI                    | Missing values > 20%        |
| Clinical Labs   | Labcorp       | METHYLMALONIC ACID        | Missing values > 20%        |
| Clinical Labs   | Labcorp       | TNF-ALPHA                 | Missing values > 20%        |
| Clinical Labs   | Labcorp       | VLDL TRIGLYCERIDES        | Missing values > 20%        |
| Clinical Labs   | Labcorp       | FOLIC ACID, SERUM         | Missing values > 20%        |
| Clinical Labs   | Labcorp       | PFFA                      | Missing values > 20%        |
| Clinical Labs   | Labcorp       | VITAMIN D2, 25-OH         | Missing values > 20%        |
| Clinical Labs   | Labcorp       | PROT AND PFFA CALC        | Missing values > 20%        |
| Clinical Labs   | Labcorp       | MPV                       | Missing values > 20%        |
| Clinical Labs   | Labcorp       | BILIRUBIN, DIRECT         | Missing values > 20%        |
| Clinical Labs   | Labcorp       | SMALL HDL PARTICLE NUMBER | Missing values > 20%        |
| Clinical Labs   | Labcorp       | LDL MEDIUM                | Missing values > 20%        |
| Clinical Labs   | Labcorp       | LEAD, BLOOD               | Missing values > 20%        |
| Clinical Labs   | Labcorp       | VITAMIN D, 25-OH TOT      | Supplementation             |
| Clinical Labs   | Labcorp       | IMMATURE GRANULOCYTES     |                             |
| Clinical Labs   | Labcorp       | ABSOLUTE                  | Highly skewed distribution  |
| Clinical Labs   | Labcorp       | OMEGA_3_TOTAL             | Supplementation             |
| Clinical Labs   | Labcorp       | OMEGA_6_TOTAL             | Supplementation             |
| Clinical Labs   | Labcorp       | POTASSIUM                 | Supplementation             |
| Clinical Labs   | Labcorp       | FERRITIN                  | Supplementation             |
| Clinical Labs   | Labcorp       | DHA                       | Supplementation             |
| Clinical Labs   | Labcorp       | GFR, MDRD                 | Age derived                 |
| Clinical Labs   | Labcorp       | MAGNESIUM, SERUM          | Supplementation             |
| Clinical Labs   | Labcorp       | CALCIUM                   | Supplementation             |
| Clinical Labs   | Labcorp       | IMMATURE GRANULOCYTES     | Highly skewed distribution  |
| Clinical Labs   | Labcorp       | LINOLEIC_ACID             | Supplementation             |
| Clinical Labs   | Labcorp       | DPA                       | Supplementation             |
| Clinical Labs   | Labcorp       | BASOPHILS                 | Highly skewed distribution  |
| Clinical Labs   | Labcorp       | OMEGA-3 INDEX             | Supplementation             |
| Clinical Labs   | Labcorp       | BASOPHILS ABSOLUTE        | Highly skewed distribution  |
| Clinical Labs   | Labcorp       | OMEGA-6/OMEGA-3 RATIO     | Supplementation             |
| Clinical Labs   | Labcorp       | GFR, MDRD, AFRICAN AM     | Age derived                 |
| Clinical Labs   | Labcorp       | ARACHIDONIC ACID          | Supplementation             |
| Clinical Labs   | Labcorp       | EPA                       | Supplementation             |
| Clinical Labs   | Quest         | leptin                    | Missing values > 20%        |
| Clinical Labs   | Quest         | zinc_plasma_or_serum      | Missing values > 20%        |
| Clinical Labs   | Quest         | LARGE LDL PARTICLE NUMBER | Missing values > 20%        |
| Clinical Labs   | Quest         | HDL PARTICLE PERCENTILE   | Missing values > 20%        |
| Clinical Labs   | Quest         | LP_PLA2                   | Missing values > 20%        |
| Clinical Labs   | Quest         | MAGNESIUM, SERUM          | Missing values > 20%        |
| Clinical Labs   | Quest         | HDL PARTICLE NUMBER       | Missing values > 20%        |
| Clinical Labs   | Quest         | DPA                       | Missing values > 20%        |
| Clinical Labs   | Quest         | IDL PARTICLE NUMBER       | Missing values > 20%        |

| <b>Modality</b> | <b>Vendor</b> | <b>Measurement</b>             | <b>Reason for exclusion</b> |
|-----------------|---------------|--------------------------------|-----------------------------|
| Clinical Labs   | Quest         | HDL SIZE PERCENTILE            | Missing values > 20%        |
| Clinical Labs   | Quest         | LINOLEIC_ACID                  | Missing values > 20%        |
| Clinical Labs   | Quest         | MEDIUM HDL PARTICLE NUMBER     | Missing values > 20%        |
| Clinical Labs   | Quest         | MEDIUM VLDL PARTICLE NUMBER    | Missing values > 20%        |
| Clinical Labs   | Quest         | LARGE VLDL PARTICLE PERCENTILE | Missing values > 20%        |
| Clinical Labs   | Quest         | SMALL HDL PARTICLE NUMBER      | Missing values > 20%        |
| Clinical Labs   | Quest         | VLDL SIZE PERCENTILE           | Missing values > 20%        |
| Clinical Labs   | Quest         | LPIR SCORE PERCENTILE          | Missing values > 20%        |
| Clinical Labs   | Quest         | SMALL VLDL PARTICLE NUMBER     | Missing values > 20%        |
| Clinical Labs   | Quest         | VLDL PARTICLE NUMBER           | Missing values > 20%        |
| Clinical Labs   | Quest         | PROTEIN                        | Missing values > 20%        |
| Clinical Labs   | Quest         | GFR, MDRD, AFRICAN AM          | Missing values > 20%        |
| Clinical Labs   | Quest         | LARGE HDL PARTICLE PERCENTILE  | Missing values > 20%        |
| Clinical Labs   | Quest         | SMALL LDL PARTICLE PERCENTILE  | Missing values > 20%        |
| Clinical Labs   | Quest         | LARGE MED HDL PARTICLE NUMBER  | Missing values > 20%        |
| Clinical Labs   | Quest         | LDL SIZE PERCENTILE            | Missing values > 20%        |
| Clinical Labs   | Quest         | VLDL LDL PARTICLE NUMBER       | Missing values > 20%        |
| Clinical Labs   | Quest         | IMMATURE GRANULOCYTES          |                             |
| Clinical Labs   | Quest         | ABSOLUTE                       | Missing values > 20%        |
| Clinical Labs   | Quest         | VLDL TRIGLYCERIDES             | Missing values > 20%        |
| Clinical Labs   | Quest         | IMMATURE GRANULOCYTES          | Missing values > 20%        |
| Clinical Labs   | Quest         | LPIR_SCORE                     | Missing values > 20%        |
| Clinical Labs   | Quest         | OMEGA_3_TOTAL                  | Missing values > 20%        |
| Clinical Labs   | Quest         | LDL_SIZE                       | Missing values > 20%        |
| Clinical Labs   | Quest         | PFFA                           | Missing values > 20%        |
| Clinical Labs   | Quest         | LARGE MED VLDL PARTICLE NUMBER | Missing values > 20%        |
| Clinical Labs   | Quest         | PROT AND PFFA CALC             | Missing values > 20%        |
| Clinical Labs   | Quest         | OMEGA_6_TOTAL                  | Missing values > 20%        |
| Clinical Labs   | Quest         | OXLDL                          | Missing values > 20%        |
| Clinical Labs   | Quest         | IL-6                           | Highly skewed distribution  |
| Clinical Labs   | Quest         | FERRITIN                       | Supplementation             |
| Clinical Labs   | Quest         | GFR, MDRD                      | Age derived                 |
| Clinical Labs   | Quest         | CALCIUM                        | Supplementation             |
| Clinical Labs   | Quest         | ZINC                           | Supplementation             |
| Clinical Labs   | Quest         | EPA/AA                         | Supplementation             |
| Clinical Labs   | Quest         | COPPER, RBC                    | Supplementation             |
| Clinical Labs   | Quest         | BASOPHILS ABSOLUTE             | Highly skewed distribution  |
| Clinical Labs   | Quest         | OMEGA-6/OMEGA-3 RATIO          | Supplementation             |
| Clinical Labs   | Quest         | SUPEROX DISMUT SOD             | Supplementation             |
| Clinical Labs   | Quest         | ARACHIDONIC ACID               | Supplementation             |
| Clinical Labs   | Quest         | EPA                            | Supplementation             |
| Clinical Labs   | Quest         | MANGANESE, SERUM               | Supplementation             |
| Clinical Labs   | Quest         | ANTIOXID CAP, TOTAL            | Supplementation             |
| Clinical Labs   | Quest         | POTASSIUM                      | Supplementation             |

| <b>Modality</b> | <b>Vendor</b> | <b>Measurement</b>                      | <b>Reason for exclusion</b> |
|-----------------|---------------|-----------------------------------------|-----------------------------|
| Clinical Labs   | Quest         | OMEGA-3 INDEX                           | Supplementation             |
| Clinical Labs   | Quest         | DHA                                     | Supplementation             |
| Clinical Labs   | Quest         | METHYLMALONIC ACID                      | Supplementation             |
| Clinical Labs   | Quest         | VITAMIN D3, 25-OH                       | Supplementation             |
| Clinical Labs   | Quest         | ZINC, RBC                               | Supplementation             |
| Clinical Labs   | Quest         | SELENIUM, SERUM                         | Supplementation             |
| Clinical Labs   | Quest         | BASOPHILS                               | Highly skewed distribution  |
| Clinical Labs   | Quest         | VITAMIN D, 25-OH TOT                    | Supplementation             |
| Clinical Labs   | Quest         | FOLIC ACID, SERUM                       | Supplementation             |
| Clinical Labs   | Quest         | VITAMIN D2, 25-OH                       | Supplementation             |
| Proteomics      | Olink         | INF_P15018(LIF)                         | Missing values > 20%        |
| Proteomics      | Olink         | INF_Q13261(IL15RA)                      | Missing values > 20%        |
| Proteomics      | Olink         | INF_Q9UHF4(IL20RA)                      | Missing values > 20%        |
| Proteomics      | Olink         | INF_Q8N6P7(IL22RA1)                     | Missing values > 20%        |
| Proteomics      | Olink         | INF_Q16552(IL17A)                       | Missing values > 20%        |
| Proteomics      | Olink         | CVD3_NT_pro_BNP(NT_pro_BNP)             | Missing values > 20%        |
| Proteomics      | Olink         | INF_Q5T4W7(ARTN)                        | Missing values > 20%        |
| Proteomics      | Olink         | INF_P01579(IFNG)                        | Missing values > 20%        |
| Proteomics      | Olink         | INF_P80098(CCL7)                        | Missing values > 20%        |
| Proteomics      | Olink         | CVD2_P35218(CA5A)                       | Missing values > 20%        |
| Proteomics      | Olink         | INF_P01375(TNF)                         | Missing values > 20%        |
| Proteomics      | Olink         | INF_Q13651(IL10RA)                      | Missing values > 20%        |
| Proteomics      | Olink         | CVD3_P01589(IL2RA)                      | Missing values > 20%        |
| Proteomics      | Olink         | INF_Q13007(IL24)                        | Missing values > 20%        |
| Proteomics      | Olink         | CVD2_Q9NQ25(SLAMF7)                     | Missing values > 20%        |
| Proteomics      | Olink         | CVD2_P09874(PARP1)                      | Missing values > 20%        |
| Proteomics      | Olink         | INF_P14784(IL2RB)                       | Missing values > 20%        |
| Proteomics      | Olink         | INF_P01583(IL1A)                        | Missing values > 20%        |
| Proteomics      | Olink         | INF_P05113(IL5)                         | Missing values > 20%        |
| Proteomics      | Olink         | INF_P05112(IL4)                         | Missing values > 20%        |
| Proteomics      | Olink         | INF_Q9NYY1(IL20)                        | Missing values > 20%        |
| Proteomics      | Olink         | CVD3_Q9HCB6(SPON1)                      | Missing values > 20%        |
| Proteomics      | Olink         | INF_P35225(IL13)                        | Missing values > 20%        |
| Proteomics      | Olink         | CVD2_P24394(IL4R)                       | Missing values > 20%        |
| Proteomics      | Olink         | INF_O95760(IL33)                        | Missing values > 20%        |
| Proteomics      | Olink         | CVD2_P16860(NPPB)                       | Missing values > 20%        |
| Proteomics      | Olink         | INF_Q969D9(TSLP)                        | Missing values > 20%        |
| Proteomics      | Olink         | INF_Q9P0M4(IL17C)                       | Missing values > 20%        |
| Proteomics      | Olink         | INF_Q8NF90(Q8NF90)                      | Missing values > 20%        |
| Proteomics      | Olink         | INF_Q99748(NRTN)                        | Missing values > 20%        |
| Proteomics      | Olink         | INF_P60568(IL2)                         | Missing values > 20%        |
| Metabolomics    | Metabolon     | betonicine(HMDB29412)                   | Missing values > 20%        |
| Metabolomics    | Metabolon     | 2-methoxyacetaminophen glucuronide*(NA) | Missing values > 20%        |

| <b>Modality</b> | <b>Vendor</b> | <b>Measurement</b>                                      | <b>Reason for exclusion</b> |
|-----------------|---------------|---------------------------------------------------------|-----------------------------|
| Metabolomics    | Metabolon     | propyl 4-hydroxybenzoate sulfate(NA)                    | Missing values > 20%        |
| Metabolomics    | Metabolon     | S-carboxymethyl-L-cysteine(HMDB29415)                   | Missing values > 20%        |
| Metabolomics    | Metabolon     | 4-methylhexanoylglutamine(NA)                           | Missing values > 20%        |
| Metabolomics    | Metabolon     | carboxyibuprofen(HMDB60564)                             | Missing values > 20%        |
| Metabolomics    | Metabolon     | O-desmethylvenlafaxine(HMDB60532)                       | Missing values > 20%        |
| Metabolomics    | Metabolon     | warfarin(HMDB01935)                                     | Missing values > 20%        |
| Metabolomics    | Metabolon     | hydroxypropylglucuronide (M-IV)(NA)                     | Missing values > 20%        |
| Metabolomics    | Metabolon     | 5alpha-androstan-3alpha,17beta-diol monosulfate (2)(NA) | Missing values > 20%        |
| Metabolomics    | Metabolon     | corticosterone(HMDB01547)                               | Missing values > 20%        |
| Metabolomics    | Metabolon     | 5alpha-pregnan-3beta-ol,20-one sulfate(NA)              | Missing values > 20%        |
| Metabolomics    | Metabolon     | theanine(HMDB34365)                                     | Missing values > 20%        |
| Metabolomics    | Metabolon     | 7-hydroxyindole sulfate(NA)                             | Missing values > 20%        |
| Metabolomics    | Metabolon     | phenylacetylglutamate(HMDB59772)                        | Missing values > 20%        |
| Metabolomics    | Metabolon     | 3b-hydroxy-5-cholenoic acid(HMDB00308)                  | Missing values > 20%        |
| Metabolomics    | Metabolon     | 4-ethylphenol glucuronide(NA)                           | Missing values > 20%        |
| Metabolomics    | Metabolon     | phosphatidylcholine (18:0/20:5, 16:0/22:5n6)*(NA)       | Missing values > 20%        |
| Metabolomics    | Metabolon     | cysteine-glutathione disulfide(HMDB00656)               | Missing values > 20%        |
| Metabolomics    | Metabolon     | estrone 3-sulfate(HMDB01425)                            | Missing values > 20%        |
| Metabolomics    | Metabolon     | 1-palmitoyl-GPE (O-16:0)*(NA)                           | Missing values > 20%        |
| Metabolomics    | Metabolon     | hydrochlorothiazide(HMDB01928)                          | Missing values > 20%        |
| Metabolomics    | Metabolon     | ranitidine(HMDB01930)                                   | Missing values > 20%        |
| Metabolomics    | Metabolon     | diphenhydramine(HMDB01927)                              | Missing values > 20%        |
| Metabolomics    | Metabolon     | glycerol 3-phosphate(HMDB00126)                         | Missing values > 20%        |
| Metabolomics    | Metabolon     | 3-(N-acetyl-L-cystein-S-yl) acetaminophen(NA)           | Missing values > 20%        |
| Metabolomics    | Metabolon     | 4-acetaminophen sulfate(HMDB59911)                      | Missing values > 20%        |
| Metabolomics    | Metabolon     | isoleucylleucine/leucylisoleucine(NA)                   | Missing values > 20%        |
| Metabolomics    | Metabolon     | alpha-CEHC sulfate(NA)                                  | Missing values > 20%        |



| <b>Modality</b> | <b>Vendor</b> | <b>Measurement</b>                                            | <b>Reason for exclusion</b> |
|-----------------|---------------|---------------------------------------------------------------|-----------------------------|
| Metabolomics    | Metabolon     | N2-acetyllysine(HMDB00446)                                    | Missing values > 20%        |
| Metabolomics    | Metabolon     | S-methylmethionine(HMDB38670)                                 | Missing values > 20%        |
| Metabolomics    | Metabolon     | indolin-2-one(NA)                                             | Missing values > 20%        |
| Metabolomics    | Metabolon     | 2-methoxyresorcinol sulfate(NA)                               | Missing values > 20%        |
| Metabolomics    | Metabolon     | N-acetyl-3-methylhistidine*(NA)                               | Missing values > 20%        |
| Metabolomics    | Metabolon     | 3-hydroxystachydrine*(NA)                                     | Missing values > 20%        |
| Metabolomics    | Metabolon     | phenylalanylphenylalanine(NA)                                 | Missing values > 20%        |
| Metabolomics    | Metabolon     | pimeloylcarnitine/3-methyladipoylcarnitine (C7-DC)(NA)        | Missing values > 20%        |
| Metabolomics    | Metabolon     | isoleucylalanine(HMDB28900)                                   | Missing values > 20%        |
| Metabolomics    | Metabolon     | chiro-inositol(HMDB34220)                                     | Missing values > 20%        |
| Metabolomics    | Metabolon     | N-stearoyltaurine(NA)                                         | Missing values > 20%        |
| Metabolomics    | Metabolon     | 1-oleoyl-GPG (18:1)*(NA)                                      | Missing values > 20%        |
| Metabolomics    | Metabolon     | 2-hydroxyphenylacetate(HMDB00669)                             | Missing values > 20%        |
| Metabolomics    | Metabolon     | cotinine(HMDB01046)                                           | Missing values > 20%        |
| Metabolomics    | Metabolon     | 1-palmitoleoyl-2-eicosapentaenoyl-GPC (16:1/20:5)*(HMDB08017) | Missing values > 20%        |
| Metabolomics    | Metabolon     | Fibrinopeptide B (1-13)**(NA)                                 | Missing values > 20%        |
| Metabolomics    | Metabolon     | pioglitazone(HMDB15264)                                       | Missing values > 20%        |
| Metabolomics    | Metabolon     | nicotinate ribonucleoside(HMDB06809)                          | Missing values > 20%        |
| Metabolomics    | Metabolon     | valylglycine(HMDB29127)                                       | Missing values > 20%        |
| Metabolomics    | Metabolon     | gabapentin(HMDB05015)                                         | Missing values > 20%        |
| Metabolomics    | Metabolon     | venlafaxine(HMDB05016)                                        | Missing values > 20%        |
| Metabolomics    | Metabolon     | sertraline(HMDB05010)                                         | Missing values > 20%        |
| Metabolomics    | Metabolon     | norfluoxetine(HMDB60551)                                      | Missing values > 20%        |
| Metabolomics    | Metabolon     | 4-hydroxyphenylacetate(HMDB00020)                             | Missing values > 20%        |
| Metabolomics    | Metabolon     | pregnanolone/allopregnanolone sulfate(NA)                     | Missing values > 20%        |
| Metabolomics    | Metabolon     | eugenol sulfate(NA)                                           | Missing values > 20%        |
| Metabolomics    | Metabolon     | 5-hydroxymethyl-2-furoylcarnitine*(NA)                        | Missing values > 20%        |

| <b>Modality</b> | <b>Vendor</b> | <b>Measurement</b>                               | <b>Reason for exclusion</b> |
|-----------------|---------------|--------------------------------------------------|-----------------------------|
| Metabolomics    | Metabolon     | 3-ureidopropionate(HMDB00026)                    | Missing values > 20%        |
| Metabolomics    | Metabolon     | tartarate(HMDB00956)                             | Missing values > 20%        |
| Metabolomics    | Metabolon     | xanthosine(HMDB00299)                            | Missing values > 20%        |
| Metabolomics    | Metabolon     | glucuronide of C10H18O2 (7)*(NA)                 | Missing values > 20%        |
| Metabolomics    | Metabolon     | 2-butenoylglycine(NA)                            | Missing values > 20%        |
| Metabolomics    | Metabolon     | suberoylcarnitine (C8-DC)(NA)                    | Missing values > 20%        |
| Metabolomics    | Metabolon     | testosterone sulfate(HMDB02833)                  | Missing values > 20%        |
| Metabolomics    | Metabolon     | lamotrigine(HMDB14695,HMDB05043)                 | Missing values > 20%        |
| Metabolomics    | Metabolon     | metoprolol acid metabolite*(NA)                  | Missing values > 20%        |
| Metabolomics    | Metabolon     | campesterol(HMDB02869)                           | Missing values > 20%        |
| Metabolomics    | Metabolon     | pyrraline(HMDB33143)                             | Missing values > 20%        |
| Metabolomics    | Metabolon     | alpha-hydroxymetoprolol(HMDB60994)               | Missing values > 20%        |
| Metabolomics    | Metabolon     | tramadol(HMDB14339)                              | Missing values > 20%        |
| Metabolomics    | Metabolon     | methylsuccinoylcarnitine(NA)                     | Missing values > 20%        |
| Metabolomics    | Metabolon     | valylglutamate(NA)                               | Missing values > 20%        |
| Metabolomics    | Metabolon     | trazadone(HMDB14794)                             | Missing values > 20%        |
| Metabolomics    | Metabolon     | bradykinin(HMDB04246)                            | Missing values > 20%        |
| Metabolomics    | Metabolon     | pyroglutamylglutamine(HMDB39229)                 | Missing values > 20%        |
| Metabolomics    | Metabolon     | 1-myristoylglycerol (14:0)(HMDB11561)            | Missing values > 20%        |
| Metabolomics    | Metabolon     | 7-ketodeoxycholate(HMDB00391)                    | Missing values > 20%        |
| Metabolomics    | Metabolon     | N4-acetylsulfamethoxazole*(HMDB13854)            | Missing values > 20%        |
| Metabolomics    | Metabolon     | N-acetyl-aspartyl-glutamate (NAAG)(HMDB01067)    | Missing values > 20%        |
| Metabolomics    | Metabolon     | 17alpha-hydroxypregnenolone 3-sulfate(HMDB00416) | Missing values > 20%        |
| Metabolomics    | Metabolon     | 2,8-quinolinediol sulfate(NA)                    | Missing values > 20%        |
| Metabolomics    | Metabolon     | equol sulfate(NA)                                | Missing values > 20%        |
| Metabolomics    | Metabolon     | 3-acetylphenol sulfate(NA)                       | Missing values > 20%        |
| Metabolomics    | Metabolon     | ibuprofen acyl glucuronide(NA)                   | Missing values > 20%        |

| <b>Modality</b> | <b>Vendor</b> | <b>Measurement</b>                                | <b>Reason for exclusion</b> |
|-----------------|---------------|---------------------------------------------------|-----------------------------|
| Metabolomics    | Metabolon     | metformin(HMDB01921)                              | Missing values > 20%        |
| Metabolomics    | Metabolon     | 5alpha-androstan-3alpha,17beta-diol disulfate(NA) | Missing values > 20%        |
| Metabolomics    | Metabolon     | cytidine(HMDB00089)                               | Missing values > 20%        |
| Metabolomics    | Metabolon     | xylose(HMDB00098)                                 | Missing values > 20%        |
| Metabolomics    | Metabolon     | lactose(HMDB00186)                                | Missing values > 20%        |
| Metabolomics    | Metabolon     | N-palmitoylserine(NA)                             | Missing values > 20%        |
| Metabolomics    | Metabolon     | arachidonoyl ethanolamide(HMDB04080)              | Missing values > 20%        |
| Metabolomics    | Metabolon     | 11-ketoetiocholanolone glucuronide(NA)            | Missing values > 20%        |
| Metabolomics    | Metabolon     | ethyl glucuronide(HMDB10325)                      | Missing values > 20%        |
| Metabolomics    | Metabolon     | N-acetyl-cadaverine(HMDB02284)                    | Missing values > 20%        |
| Metabolomics    | Metabolon     | 4-hydroxy-2-oxoglutaric acid(HMDB02070)           | Missing values > 20%        |
| Metabolomics    | Metabolon     | N-acetyl-S-allyl-L-cysteine(NA)                   | Missing values > 20%        |
| Metabolomics    | Metabolon     | carnosine(HMDB00033)                              | Missing values > 20%        |
| Metabolomics    | Metabolon     | dexlansoprazole(NA)                               | Missing values > 20%        |
| Metabolomics    | Metabolon     | phenylalanylleucine(NA)                           | Missing values > 20%        |
| Metabolomics    | Metabolon     | tryptophylleucine(HMDB29087)                      | Missing values > 20%        |
| Metabolomics    | Metabolon     | 3,4-methyleneheptanoylcarnitine(NA)               | Missing values > 20%        |
| Metabolomics    | Metabolon     | dihomo-linolenoyl-choline(NA)                     | Missing values > 20%        |
| Metabolomics    | Metabolon     | caffeic acid sulfate(HMDB41708)                   | Missing values > 20%        |
| Metabolomics    | Metabolon     | phenylacetylcarnitine(NA)                         | Missing values > 20%        |
| Metabolomics    | Metabolon     | N-(2-furoyl)glycine(HMDB00439)                    | Missing values > 20%        |
| Metabolomics    | Metabolon     | 3-(3-hydroxyphenyl)propionate(HMDB00375)          | Missing values > 20%        |
| Metabolomics    | Metabolon     | leucylleucine(HMDB28933)                          | Missing values > 20%        |
| Metabolomics    | Metabolon     | 2-acetamidophenol sulfate(NA)                     | Missing values > 20%        |
| Metabolomics    | Metabolon     | gamma-CEHC glucuronide*(NA)                       | Missing values > 20%        |
| Metabolomics    | Metabolon     | pregabalin(NA)                                    | Missing values > 20%        |
| Metabolomics    | Metabolon     | L-urobilin(HMDB04159)                             | Missing values > 20%        |

| <b>Modality</b> | <b>Vendor</b> | <b>Measurement</b>                                       | <b>Reason for exclusion</b> |
|-----------------|---------------|----------------------------------------------------------|-----------------------------|
| Metabolomics    | Metabolon     | docosapentaenoylcarnitine (C22:5n3)*(NA)                 | Missing values > 20%        |
| Metabolomics    | Metabolon     | adrenoylcarnitine (C22:4)*(NA)                           | Missing values > 20%        |
| Metabolomics    | Metabolon     | 2-hydroxyadipate(HMDB00321)                              | Missing values > 20%        |
| Metabolomics    | Metabolon     | metoprolol(HMDB01932)                                    | Missing values > 20%        |
| Metabolomics    | Metabolon     | cytosine(HMDB00630)                                      | Missing values > 20%        |
| Metabolomics    | Metabolon     | dihydrocaffeate sulfate (2)(NA)                          | Missing values > 20%        |
| Metabolomics    | Metabolon     | 3-(methylthio)acetaminophen sulfate*(NA)                 | Missing values > 20%        |
| Metabolomics    | Metabolon     | suberate (C8-DC)(HMDB00893)                              | Missing values > 20%        |
| Metabolomics    | Metabolon     | xanthurenate(HMDB00881)                                  | Missing values > 20%        |
| Metabolomics    | Metabolon     | phenylacetate(HMDB00209)                                 | Missing values > 20%        |
| Metabolomics    | Metabolon     | alliin(HMDB33592)                                        | Missing values > 20%        |
| Metabolomics    | Metabolon     | daidzein sulfate (2)(NA)                                 | Missing values > 20%        |
| Metabolomics    | Metabolon     | dopamine 4-sulfate(HMDB04148)                            | Missing values > 20%        |
| Metabolomics    | Metabolon     | flavin adenine dinucleotide (FAD)(HMDB01248)             | Missing values > 20%        |
| Metabolomics    | Metabolon     | 1-stearyl-GPC (O-18:0)*(HMDB11149)                       | Missing values > 20%        |
| Metabolomics    | Metabolon     | adenosine 3',5'-cyclic monophosphate (cAMP)(HMDB00058)   | Missing values > 20%        |
| Metabolomics    | Metabolon     | 5-hydroxyindoleacetate(HMDB00763)                        | Missing values > 20%        |
| Metabolomics    | Metabolon     | hydroxybupropion(HMDB12235)                              | Missing values > 20%        |
| Metabolomics    | Metabolon     | lanthionine(NA)                                          | Missing values > 20%        |
| Metabolomics    | Metabolon     | saccharin(HMDB29723)                                     | Missing values > 20%        |
| Metabolomics    | Metabolon     | N-alpha-acetylornithine(HMDB03357)                       | Missing values > 20%        |
| Metabolomics    | Metabolon     | 1-stearoyl-2-docosahexaenoyl-GPI (18:0/22:6)*(HMDB09821) | Missing values > 20%        |
| Metabolomics    | Metabolon     | nicotinurate(HMDB03269)                                  | Missing values > 20%        |
| Metabolomics    | Metabolon     | 2-methylmalonylcarnitine (C4-DC)(HMDB13133)              | Missing values > 20%        |
| Metabolomics    | Metabolon     | oxypurinol(HMDB00786)                                    | Missing values > 20%        |
| Metabolomics    | Metabolon     | hydroxycotinine(HMDB01390)                               | Missing values > 20%        |
| Metabolomics    | Metabolon     | naproxen(HMDB01923)                                      | Missing values > 20%        |

| <b>Modality</b> | <b>Vendor</b> | <b>Measurement</b>                                   | <b>Reason for exclusion</b> |
|-----------------|---------------|------------------------------------------------------|-----------------------------|
| Metabolomics    | Metabolon     | dihydroorotate(HMDB03349)                            | Missing values > 20%        |
| Metabolomics    | Metabolon     | caproate (6:0)(HMDB00535)                            | Missing values > 20%        |
| Metabolomics    | Metabolon     | 4-acetamidophenol(HMDB01859)                         | Missing values > 20%        |
| Metabolomics    | Metabolon     | cystathionine(HMDB00099)                             | Missing values > 20%        |
| Metabolomics    | Metabolon     | dihydroferulate(NA)                                  | Missing values > 20%        |
| Metabolomics    | Metabolon     | prolylglycine(HMDB11178)                             | Missing values > 20%        |
| Metabolomics    | Metabolon     | threonylalanine(HMDB29054)                           | Missing values > 20%        |
| Metabolomics    | Metabolon     | 21-hydroxypregnenolone monosulfate (1)(NA)           | Missing values > 20%        |
| Metabolomics    | Metabolon     | 1-lignoceroyl-2-arachidonoyl-GPC (24:0/20:4)*(NA)    | Missing values > 20%        |
| Metabolomics    | Metabolon     | 5alpha-androstan-3alpha,17alpha-diol monosulfate(NA) | Missing values > 20%        |
| Metabolomics    | Metabolon     | galactonate(HMDB00565)                               | Missing values > 20%        |
| Metabolomics    | Metabolon     | 4-acetylphenol sulfate(NA)                           | Missing values > 20%        |
| Metabolomics    | Metabolon     | 2-aminoadipate(HMDB00510)                            | Missing values > 20%        |
| Metabolomics    | Metabolon     | pyroglutamylalanine*(NA)                             | Missing values > 20%        |
| Metabolomics    | Metabolon     | 1-lignoceroyl-GPC (24:0)(HMDB10405)                  | Missing values > 20%        |
| Metabolomics    | Metabolon     | 1-(1-enyl-stearoyl)-GPC (P-18:0)*(HMDB13122)         | Missing values > 20%        |
| Metabolomics    | Metabolon     | 3-methyl catechol sulfate (2)(NA)                    | Missing values > 20%        |
| Metabolomics    | Metabolon     | 1-nervonoyl-GPC (24:1n9)*(NA)                        | Missing values > 20%        |
| Metabolomics    | Metabolon     | N-methyltaurine(NA)                                  | Missing values > 20%        |
| Metabolomics    | Metabolon     | 17alpha-hydroxypregnanolone glucuronide(NA)          | Missing values > 20%        |
| Metabolomics    | Metabolon     | escitalopram(HMDB05028)                              | Missing values > 20%        |
| Metabolomics    | Metabolon     | alpha-CEHC glucuronide*(NA)                          | Missing values > 20%        |
| Metabolomics    | Metabolon     | cetirizine(HMDB05032)                                | Missing values > 20%        |
| Metabolomics    | Metabolon     | 2-oxindole-3-acetate(HMDB35514)                      | Missing values > 20%        |
| Metabolomics    | Metabolon     | 3,4-methyleneheptanoate(NA)                          | Missing values > 20%        |
| Metabolomics    | Metabolon     | bradykinin, hydroxy-pro(3)(HMDB11728)                | Missing values > 20%        |
| Metabolomics    | Metabolon     | salicyluric glucuronide*(NA)                         | Missing values > 20%        |

| <b>Modality</b> | <b>Vendor</b> | <b>Measurement</b>                                                     | <b>Reason for exclusion</b> |
|-----------------|---------------|------------------------------------------------------------------------|-----------------------------|
| Metabolomics    | Metabolon     | valylleucine(HMDB29131)                                                | Missing values > 20%        |
| Metabolomics    | Metabolon     | prolylalanine(HMDB29010)                                               | Missing values > 20%        |
| Metabolomics    | Metabolon     | acetoacetate(HMDB00060)                                                | Missing values > 20%        |
| Metabolomics    | Metabolon     | catechol glucuronide(NA)                                               | Missing values > 20%        |
| Metabolomics    | Metabolon     | sulfamethoxazole(HMDB15150)                                            | Missing values > 20%        |
| Metabolomics    | Metabolon     | glucuronide of C <sub>19</sub> H <sub>28</sub> O <sub>4</sub> (2)*(NA) | Missing values > 20%        |
| Metabolomics    | Metabolon     | 1-linoleoyl-GPA (18:2)*(HMDB07856)                                     | Missing values > 20%        |
| Metabolomics    | Metabolon     | quinine(NA)                                                            | Missing values > 20%        |
| Metabolomics    | Metabolon     | malonylcarnitine(HMDB02095)                                            | Missing values > 20%        |
| Metabolomics    | Metabolon     | hexanoylglycine(HMDB00701)                                             | Missing values > 20%        |
| Metabolomics    | Metabolon     | methyl indole-3-acetate(HMDB29738)                                     | Missing values > 20%        |
| Metabolomics    | Metabolon     | 1-palmitoleoylglycerol (16:1)*(HMDB11565)                              | Missing values > 20%        |
| Metabolomics    | Metabolon     | 3-methylcytidine(NA)                                                   | Missing values > 20%        |
| Metabolomics    | Metabolon     | glycocholate glucuronide (1)(NA)                                       | Missing values > 20%        |
| Metabolomics    | Metabolon     | mycophenolic acid(HMDB15159)                                           | Missing values > 20%        |
| Metabolomics    | Metabolon     | acesulfame(HMDB33585)                                                  | Missing values > 20%        |
| Metabolomics    | Metabolon     | diacylglycerol (14:0/18:1, 16:0/16:1) [2]*(NA)                         | Missing values > 20%        |
| Metabolomics    | Metabolon     | diacylglycerol (14:0/18:1, 16:0/16:1) [1]*(NA)                         | Missing values > 20%        |
| Metabolomics    | Metabolon     | 3-(3-hydroxyphenyl)propionate sulfate(NA)                              | Missing values > 20%        |
| Metabolomics    | Metabolon     | 4-hydroxycoumarin(NA)                                                  | Missing values > 20%        |
| Metabolomics    | Metabolon     | 3-(cystein-S-yl)acetaminophen*(NA)                                     | Missing values > 20%        |
| Metabolomics    | Metabolon     | glycolithocholate(HMDB00698)                                           | Missing values > 20%        |
| Metabolomics    | Metabolon     | 5-hydroxyhexanoate(HMDB00525)                                          | Missing values > 20%        |
| Metabolomics    | Metabolon     | 2-methoxyacetaminophen sulfate*(NA)                                    | Missing values > 20%        |
| Metabolomics    | Metabolon     | 2-hydroxyacetaminophen sulfate*(NA)                                    | Missing values > 20%        |
| Metabolomics    | Metabolon     | erucoylcarnitine (C <sub>22</sub> :1)*(NA)                             | Missing values > 20%        |
| Metabolomics    | Metabolon     | beta-guanidinopropanoate(HMDB13222)                                    | Missing values > 20%        |

| <b>Modality</b> | <b>Vendor</b> | <b>Measurement</b>                                  | <b>Reason for exclusion</b> |
|-----------------|---------------|-----------------------------------------------------|-----------------------------|
| Metabolomics    | Metabolon     | 3-hydroxysebacate(HMDB00350)                        | Missing values > 20%        |
| Metabolomics    | Metabolon     | benzoate(HMDB01870)                                 | Missing values > 20%        |
| Metabolomics    | Metabolon     | diltiazem(HMDB14487)                                | Missing values > 20%        |
| Metabolomics    | Metabolon     | 1,2,3-benzenetriol sulfate (1)(NA)                  | Missing values > 20%        |
| Metabolomics    | Metabolon     | 1,2,3-benzenetriol sulfate (2)(NA)                  | Missing values > 20%        |
| Metabolomics    | Metabolon     | 3-methoxycatechol sulfate (1)(NA)                   | Missing values > 20%        |
| Metabolomics    | Metabolon     | o-cresol sulfate(NA)                                | Missing values > 20%        |
| Metabolomics    | Metabolon     | N-acetylkynurenine (2)(NA)                          | Missing values > 20%        |
| Metabolomics    | Metabolon     | 4-hydroxyglutamate(HMDB01344)                       | Missing values > 20%        |
| Metabolomics    | Metabolon     | 5-(galactosylhydroxy)-L-lysine(NA)                  | Missing values > 20%        |
| Metabolomics    | Metabolon     | cholic acid glucuronide(NA)                         | Missing values > 20%        |
| Metabolomics    | Metabolon     | N6-succinyladenosine(HMDB00912)                     | Missing values > 20%        |
| Metabolomics    | Metabolon     | 1-palmitoyl-2-docosahexaenoyl-GPI (16:0/22:6)*(NA)  | Missing values > 20%        |
| Metabolomics    | Metabolon     | cyclo(ala-pro)(NA)                                  | Missing values > 20%        |
| Metabolomics    | Metabolon     | retinal(HMDB01358)                                  | Missing values > 20%        |
| Metabolomics    | Metabolon     | 2-hydroxyibuprofen(HMDB60920)                       | Missing values > 20%        |
| Metabolomics    | Metabolon     | glycohyocholate(NA)                                 | Missing values > 20%        |
| Metabolomics    | Metabolon     | bradykinin, des-arg(9)(HMDB04246)                   | Missing values > 20%        |
| Metabolomics    | Metabolon     | 2-methylcitrate/homocitrate(NA)                     | Missing values > 20%        |
| Metabolomics    | Metabolon     | N-acetylglucosaminylasparagine(HMDB00489)           | Missing values > 20%        |
| Metabolomics    | Metabolon     | 4-imidazoleacetate(HMDB02024)                       | Missing values > 20%        |
| Metabolomics    | Metabolon     | gulonate*(HMDB03290)                                | Missing values > 20%        |
| Metabolomics    | Metabolon     | 1-dihomo-linolenylglycerol (20:3)(NA)               | Missing values > 20%        |
| Metabolomics    | Metabolon     | 1,2-dilinoleoyl-GPE (18:2/18:2)*(HMDB09093)         | Missing values > 20%        |
| Metabolomics    | Metabolon     | homovanillate (HVA)(HMDB00118)                      | Missing values > 20%        |
| Metabolomics    | Metabolon     | 4-vinylguaiacol sulfate(NA)                         | Missing values > 20%        |
| Metabolomics    | Metabolon     | 1-oleoyl-2-arachidonoyl-GPE (18:1/20:4)*(HMDB09069) | Missing values > 20%        |

| <b>Modality</b> | <b>Vendor</b> | <b>Measurement</b>                                              | <b>Reason for exclusion</b> |
|-----------------|---------------|-----------------------------------------------------------------|-----------------------------|
| Metabolomics    | Metabolon     | atenolol(HMDB01924)                                             | Missing values > 20%        |
| Metabolomics    | Metabolon     | omeprazole(HMDB01913)                                           | Missing values > 20%        |
| Metabolomics    | Metabolon     | isoeugenol sulfate(NA)                                          | Missing values > 20%        |
| Metabolomics    | Metabolon     | glutamate, gamma-methyl ester(HMDB61715)                        | Missing values > 20%        |
| Metabolomics    | Metabolon     | 2-linoleoylglycerol (18:2)(HMDB11538)                           | Missing values > 20%        |
| Metabolomics    | Metabolon     | 5alpha-pregnan-diol disulfate(NA)                               | Missing values > 20%        |
| Metabolomics    | Metabolon     | indoleacetylglutamine(HMDB13240)                                | Missing values > 20%        |
| Metabolomics    | Metabolon     | 4-acetamidophenylglucuronide(HMDB10316)                         | Missing values > 20%        |
| Metabolomics    | Metabolon     | valsartan(NA)                                                   | Missing values > 20%        |
| Metabolomics    | Metabolon     | 1-carboxyethylisoleucine(NA)                                    | Missing values > 20%        |
| Metabolomics    | Metabolon     | beta-sitosterol(HMDB00852)                                      | Missing values > 20%        |
| Metabolomics    | Metabolon     | levulinate (4-oxovalerate)(HMDB00720)                           | Missing values > 20%        |
| Metabolomics    | Metabolon     | 1-erucoyl-GPC (22:1)*(NA)                                       | Missing values > 20%        |
| Metabolomics    | Metabolon     | phenylalanylmethionine(NA)                                      | Missing values > 20%        |
| Metabolomics    | Metabolon     | 2'-O-methylcytidine(NA)                                         | Missing values > 20%        |
| Metabolomics    | Metabolon     | gamma-glutamylalanine(HMDB29142)                                | Missing values > 20%        |
| Metabolomics    | Metabolon     | 1-(1-enyl-palmitoyl)-2-dihomo-linolenoyl-GPC (P-16:0/20:3)*(NA) | Missing values > 20%        |
| Metabolomics    | Metabolon     | nicotinate(HMDB01488)                                           | Missing values > 20%        |
| Metabolomics    | Metabolon     | taurodeoxycholic acid 3-sulfate(NA)                             | Missing values > 20%        |
| Metabolomics    | Metabolon     | 3-methoxytyramine sulfate(NA)                                   | Missing values > 20%        |
| Metabolomics    | Metabolon     | 1-stearoyl-2-adrenoyl-GPE (18:0/22:4)*(HMDB09009)               | Missing values > 20%        |
| Metabolomics    | Metabolon     | Fibrinopeptide A*(NA)                                           | Missing values > 20%        |
| Metabolomics    | Metabolon     | Fibrinopeptide A, des-ala(1)*(NA)                               | Missing values > 20%        |
| Metabolomics    | Metabolon     | 1-stearoyl-2-docosapentaenoyl-GPE (18:0/22:5n3)*(NA)            | Missing values > 20%        |
| Metabolomics    | Metabolon     | ibuprofen(HMDB01925)                                            | Missing values > 20%        |
| Metabolomics    | Metabolon     | doxycycline(NA)                                                 | Missing values > 20%        |
| Metabolomics    | Metabolon     | 2-stearoyl-GPI (18:0)*(NA)                                      | Missing values > 20%        |



| <b>Modality</b> | <b>Vendor</b> | <b>Measurement</b>                                      | <b>Reason for exclusion</b>                                         |
|-----------------|---------------|---------------------------------------------------------|---------------------------------------------------------------------|
| Metabolomics    | Metabolon     | tigloylglycine(HMDB00959)                               | Missing values > 20%                                                |
| Metabolomics    | Metabolon     | umbelliferone sulfate(NA)                               | Missing values > 20%                                                |
| Metabolomics    | Metabolon     | methionylalanine(NA)                                    | Missing values > 20%                                                |
| Metabolomics    | Metabolon     | cyclo(pro-arg)*(NA)                                     | Missing values > 20%                                                |
| Metabolomics    | Metabolon     | glucuronide of C10H18O2 (1)*(NA)                        | Missing values > 20%                                                |
| Metabolomics    | Metabolon     | palmitoleoyl-arachidonoyl-glycerol (16:1/20:4) [2]*(NA) | Missing values > 20%                                                |
| Metabolomics    | Metabolon     | tauro-beta-muricholate(HMDB00932)                       | Missing values > 20%                                                |
| Metabolomics    | Metabolon     | 3,7-dimethylurate(HMDB01982)                            | Missing values > 20%                                                |
| Metabolomics    | Metabolon     | 1,3,7-trimethylurate(HMDB02123)                         | Missing values > 20%                                                |
| Metabolomics    | Metabolon     | ferulic acid 4-sulfate(HMDB29200)                       | Missing values > 20%                                                |
| Metabolomics    | Metabolon     | desmethylnaproxen sulfate(NA)                           | Missing values > 20%                                                |
| Metabolomics    | Metabolon     | sucralose(HMDB31554)                                    | Missing values > 20%                                                |
| Metabolomics    | Metabolon     | levetiracetam(NA)                                       | Missing values > 20%                                                |
| Metabolomics    | Metabolon     | solanidine(HMDB03236)                                   | Missing values > 20%                                                |
| Metabolomics    | Metabolon     | 1-palmitoleoyl-GPE (16:1)*(HMDB11474)                   | Missing values > 20%                                                |
| Metabolomics    | Metabolon     | fluoxetine(NA)                                          | Missing values > 20%                                                |
| Metabolomics    | Metabolon     | benzoylcarnitine*(NA)                                   | Missing values > 20%                                                |
| Metabolomics    | Metabolon     | 1-arachidonoyl-GPC (20:4n6)*                            | Missing values > 20%<br>Correlated with ARACHIDONIC ACID @ r = 0.31 |
| Metabolomics    | Metabolon     | 2-arachidonoyl-GPC (20:4)*                              | Missing values > 20%<br>Correlated with ARACHIDONIC ACID @ r = 0.27 |
| Metabolomics    | Metabolon     | 1-stearoyl-2-arachidonoyl-GPC (18:0/20:4)               | Missing values > 20%<br>Correlated with ARACHIDONIC ACID @ r = 0.34 |
| Metabolomics    | Metabolon     | 1-adrenoyl-GPC (22:4)*                                  | Missing values > 20%<br>Correlated with ARACHIDONIC ACID @ r = 0.27 |
| Metabolomics    | Metabolon     | 1-palmitoyl-2-arachidonoyl-GPC (16:0/20:4n6)            | Missing values > 20%<br>Correlated with ARACHIDONIC ACID @ r = 0.31 |
| Metabolomics    | Metabolon     | 1-(1-enyl-stearoyl)-2-arachidonoyl-GPC (P-18:0/20:4)    | Missing values > 20%<br>Correlated with ARACHIDONIC ACID @ r = 0.48 |
| Metabolomics    | Metabolon     | 1-(1-enyl-stearoyl)-2-arachidonoyl-GPE (P-18:0/20:4)*   | Missing values > 20%<br>Correlated with ARACHIDONIC ACID @ r = 0.31 |

| Modality     | Vendor    | Measurement                                            | Reason for exclusion                        |
|--------------|-----------|--------------------------------------------------------|---------------------------------------------|
| Metabolomics | Metabolon | 1-(1-enyl-palmitoyl)-2-arachidonoyl-GPC (P-16:0/20:4)* | Correlated with ARACHIDONIC ACID @ r = 0.50 |
| Metabolomics | Metabolon | 1-stearyl-2-arachidonoyl-GPC (O-18:0/20:4)*            | Correlated with ARACHIDONIC ACID @ r = 0.48 |
| Metabolomics | Metabolon | 1-palmitoyl-2-arachidonoyl-GPC (O-16:0/20:4)*          | Correlated with ARACHIDONIC ACID @ r = 0.46 |
| Metabolomics | Metabolon | 1-pentadecanoyl-2-arachidonoyl-GPC (15:0/20:4)*        | Correlated with ARACHIDONIC ACID @ r = 0.35 |
| Metabolomics | Metabolon | 1-margaroyl-2-arachidonoyl-GPC (17:0/20:4)*            | Correlated with ARACHIDONIC ACID @ r = 0.52 |
| Metabolomics | Metabolon | 1-stearyl-2-docosapentaenoyl-GPC (O-18:0/22:5n3)*      | Correlated with ARACHIDONIC ACID @ r = 0.30 |
| Metabolomics | Metabolon | 4-methyl-2-oxopentanoate                               | Correlated with CALCIUM @ r = 0.24          |
| Metabolomics | Metabolon | docosahexaenoate (DHA; 22:6n3)                         | Correlated with DHA @ r = 0.56              |
| Metabolomics | Metabolon | cysteine s-sulfate                                     | Correlated with DHA @ r = 0.30              |
| Metabolomics | Metabolon | oxalate (ethanedioate)                                 | Correlated with DHA @ r = 0.31              |
| Metabolomics | Metabolon | threonate                                              | Correlated with DHA @ r = 0.36              |
| Metabolomics | Metabolon | 3-carboxy-4-methyl-5-propyl-2-furanpropanoate (CMPF)   | Correlated with DHA @ r = 0.63              |
| Metabolomics | Metabolon | 1-docosahexaenoyl-GPC (22:6)*                          | Correlated with DHA @ r = 0.54              |
| Metabolomics | Metabolon | beta-cryptoxanthin                                     | Correlated with DHA @ r = 0.25              |
| Metabolomics | Metabolon | 1-docosahexaenoyl-GPE (22:6)*                          | Correlated with DHA @ r = 0.50              |
| Metabolomics | Metabolon | ergothioneine                                          | Correlated with DHA @ r = 0.35              |
| Metabolomics | Metabolon | 1-eicosapentaenoyl-GPE (20:5)*                         | Correlated with DHA @ r = 0.36              |
| Metabolomics | Metabolon | 1-eicosapentaenoyl-GPC (20:5)*                         | Correlated with DHA @ r = 0.42              |
| Metabolomics | Metabolon | 1-palmitoyl-2-docosahexaenoyl-GPC (16:0/22:6)          | Correlated with DHA @ r = 0.58              |
| Metabolomics | Metabolon | 1-stearoyl-2-docosahexaenoyl-GPC (18:0/22:6)           | Correlated with DHA @ r = 0.58              |
| Metabolomics | Metabolon | 1-(1-enyl-stearoyl)-2-oleoyl-GPC (P-18:0/18:1)         | Correlated with DHA @ r = 0.27              |
| Metabolomics | Metabolon | 1-palmitoyl-2-eicosapentaenoyl-GPC (16:0/20:5)*        | Correlated with DHA @ r = 0.37              |
| Metabolomics | Metabolon | 1-palmitoyl-2-docosahexaenoyl-GPE (16:0/22:6)*         | Correlated with DHA @ r = 0.30              |
| Metabolomics | Metabolon | 1-stearoyl-2-docosahexaenoyl-GPE (18:0/22:6)*          | Correlated with DHA @ r = 0.23              |

| <b>Modality</b> | <b>Vendor</b> | <b>Measurement</b>                                        | <b>Reason for exclusion</b>    |
|-----------------|---------------|-----------------------------------------------------------|--------------------------------|
| Metabolomics    | Metabolo<br>n | 1-(1-enyl-palmitoyl)-2-docosahexaenoyl-GPE (P-16:0/22:6)* | Correlated with DHA @ r = 0.54 |
| Metabolomics    | Metabolo<br>n | 1-(1-enyl-stearoyl)-2-docosahexaenoyl-GPE (P-18:0/22:6)*  | Correlated with DHA @ r = 0.57 |
| Metabolomics    | Metabolo<br>n | 1-(1-enyl-palmitoyl)-2-oleoyl-GPC (P-16:0/18:1)*          | Correlated with DHA @ r = 0.32 |
| Metabolomics    | Metabolo<br>n | 1-(1-enyl-palmitoyl)-2-docosahexaenoyl-GPC (P-16:0/22:6)* | Correlated with DHA @ r = 0.59 |
| Metabolomics    | Metabolo<br>n | 1-(1-enyl-stearoyl)-2-docosahexaenoyl-GPC (P-18:0/22:6)*  | Correlated with DHA @ r = 0.59 |
| Metabolomics    | Metabolo<br>n | 1-palmitoyl-2-oleoyl-GPC (O-16:0/18:1)*                   | Correlated with DHA @ r = 0.25 |
| Metabolomics    | Metabolo<br>n | 1-pentadecanoyl-2-docosahexaenoyl-GPC (15:0/22:6)*        | Correlated with DHA @ r = 0.53 |
| Metabolomics    | Metabolo<br>n | 1-margaroyl-2-docosahexaenoyl-GPC (17:0/22:6)*            | Correlated with DHA @ r = 0.63 |
| Metabolomics    | Metabolo<br>n | 1-oleoyl-2-docosahexaenoyl-GPC (18:1/22:6)*               | Correlated with DHA @ r = 0.42 |
| Metabolomics    | Metabolo<br>n | 1-linoleoyl-2-docosahexaenoyl-GPC (18:2/22:6)*            | Correlated with DHA @ r = 0.34 |
| Metabolomics    | Metabolo<br>n | 1-(1-enyl-stearoyl)-2-linoleoyl-GPC (P-18:0/18:2)*        | Correlated with DHA @ r = 0.25 |
| Metabolomics    | Metabolo<br>n | 1-myristoyl-2-docosahexaenoyl-GPC (14:0/22:6)*            | Correlated with DHA @ r = 0.32 |
| Metabolomics    | Metabolo<br>n | 1-(1-enyl-palmitoyl)-2-palmitoyl-GPC (P-16:0/16:0)*       | Correlated with DHA @ r = 0.24 |
| Metabolomics    | Metabolo<br>n | 1-(1-enyl-oleoyl)-2-docosahexaenoyl-GPE (P-18:1/22:6)*    | Correlated with DHA @ r = 0.55 |
| Metabolomics    | Metabolo<br>n | perfluorooctanesulfonate (PFOS)                           | Correlated with DHA @ r = 0.24 |
| Metabolomics    | Metabolo<br>n | carotene diol (1)                                         | Correlated with DHA @ r = 0.36 |
| Metabolomics    | Metabolo<br>n | carotene diol (2)                                         | Correlated with DHA @ r = 0.32 |
| Metabolomics    | Metabolo<br>n | hydroxy-CMPF*                                             | Correlated with DHA @ r = 0.66 |
| Metabolomics    | Metabolo<br>n | 3-carboxy-4-methyl-5-pentyl-2-furanpropionate (3-CMPFP)** | Correlated with DHA @ r = 0.28 |
| Metabolomics    | Metabolo<br>n | branched chain 14:0 dicarboxylic acid**                   | Correlated with DHA @ r = 0.26 |
| Metabolomics    | Metabolo<br>n | glycerate                                                 | Correlated with DHA @ r = 0.24 |
| Metabolomics    | Metabolo<br>n | erucate (22:1n9)                                          | Correlated with DHA @ r = 0.25 |
| Metabolomics    | Metabolo<br>n | 3-carboxy-4-methyl-5-propyl-2-furanpropanoate (CMPF)      | Correlated with DPA @ r = 0.30 |
| Metabolomics    | Metabolo<br>n | 1-docosapentaenoyl-GPC (22:5n3)*                          | Correlated with DPA @ r = 0.35 |
| Metabolomics    | Metabolo<br>n | 1-eicosapentaenoyl-GPE (20:5)*                            | Correlated with DPA @ r = 0.31 |
| Metabolomics    | Metabolo<br>n | 1-eicosapentaenoyl-GPC (20:5)*                            | Correlated with DPA @ r = 0.36 |
| Metabolomics    | Metabolo<br>n | 1-palmitoyl-2-eicosapentaenoyl-GPC (16:0/20:5)*           | Correlated with DPA @ r = 0.27 |

| <b>Modality</b> | <b>Vendor</b> | <b>Measurement</b>                                   | <b>Reason for exclusion</b>    |
|-----------------|---------------|------------------------------------------------------|--------------------------------|
| Metabolomics    | Metabolon     | 1-stearoyl-2-docosapentaenoyl-GPC (18:0/22:5n3)*     | Correlated with EPA @ r = 0.25 |
| Metabolomics    | Metabolon     | hydroxy-CMPF*                                        | Correlated with EPA @ r = 0.30 |
| Metabolomics    | Metabolon     | docosahexaenoate (DHA; 22:6n3)                       | Correlated with EPA @ r = 0.50 |
| Metabolomics    | Metabolon     | cysteine s-sulfate                                   | Correlated with EPA @ r = 0.44 |
| Metabolomics    | Metabolon     | oxalate (ethanedioate)                               | Correlated with EPA @ r = 0.31 |
| Metabolomics    | Metabolon     | threonate                                            | Correlated with EPA @ r = 0.38 |
| Metabolomics    | Metabolon     | pyridoxate                                           | Correlated with EPA @ r = 0.29 |
| Metabolomics    | Metabolon     | 3-carboxy-4-methyl-5-propyl-2-furanpropanoate (CMPF) | Correlated with EPA @ r = 0.62 |
| Metabolomics    | Metabolon     | docosapentaenoate (n3 DPA; 22:5n3)                   | Correlated with EPA @ r = 0.29 |
| Metabolomics    | Metabolon     | stearidonate (18:4n3)                                | Correlated with EPA @ r = 0.26 |
| Metabolomics    | Metabolon     | 1-oleoyl-GPC (18:1)                                  | Correlated with EPA @ r = 0.26 |
| Metabolomics    | Metabolon     | 2-oleoyl-GPC (18:1)*                                 | Correlated with EPA @ r = 0.25 |
| Metabolomics    | Metabolon     | 1-docosahexaenoyl-GPC (22:6)*                        | Correlated with EPA @ r = 0.48 |
| Metabolomics    | Metabolon     | 4-allylphenol sulfate                                | Correlated with EPA @ r = 0.24 |
| Metabolomics    | Metabolon     | bilirubin (E,E)*                                     | Correlated with EPA @ r = 0.22 |
| Metabolomics    | Metabolon     | 1-docosahexaenoyl-GPE (22:6)*                        | Correlated with EPA @ r = 0.48 |
| Metabolomics    | Metabolon     | 1-docosapentaenoyl-GPC (22:5n3)*                     | Correlated with EPA @ r = 0.31 |
| Metabolomics    | Metabolon     | ergothioneine                                        | Correlated with EPA @ r = 0.35 |
| Metabolomics    | Metabolon     | 2,3-dihydroxyisovalerate                             | Correlated with EPA @ r = 0.23 |
| Metabolomics    | Metabolon     | trimethylamine N-oxide                               | Correlated with EPA @ r = 0.23 |
| Metabolomics    | Metabolon     | 1-eicosapentaenoyl-GPE (20:5)*                       | Correlated with EPA @ r = 0.63 |
| Metabolomics    | Metabolon     | 1-eicosapentaenoyl-GPC (20:5)*                       | Correlated with EPA @ r = 0.69 |
| Metabolomics    | Metabolon     | 1-eicosenoyl-GPC (20:1)*                             | Correlated with EPA @ r = 0.24 |
| Metabolomics    | Metabolon     | methyl glucopyranoside (alpha + beta)                | Correlated with EPA @ r = 0.23 |
| Metabolomics    | Metabolon     | 1-stearoyl-2-oleoyl-GPC (18:0/18:1)                  | Correlated with EPA @ r = 0.27 |
| Metabolomics    | Metabolon     | 1-palmitoyl-2-docosahexaenoyl-GPC (16:0/22:6)        | Correlated with EPA @ r = 0.47 |
| Metabolomics    | Metabolon     | 1-stearoyl-2-docosahexaenoyl-GPC (18:0/22:6)         | Correlated with EPA @ r = 0.48 |

| <b>Modality</b> | <b>Vendor</b> | <b>Measurement</b>                                        | <b>Reason for exclusion</b>    |
|-----------------|---------------|-----------------------------------------------------------|--------------------------------|
| Metabolomics    | Metabolo<br>n | 1-(1-enyl-stearoyl)-2-oleoyl-GPC (P-18:0/18:1)            | Correlated with EPA @ r = 0.27 |
| Metabolomics    | Metabolo<br>n | 1-palmitoyl-2-eicosapentaenoyl-GPC (16:0/20:5)*           | Correlated with EPA @ r = 0.68 |
| Metabolomics    | Metabolo<br>n | 1-palmitoyl-2-docosahexaenoyl-GPE (16:0/22:6)*            | Correlated with EPA @ r = 0.27 |
| Metabolomics    | Metabolo<br>n | 1-(1-enyl-palmitoyl)-2-docosahexaenoyl-GPE (P-16:0/22:6)* | Correlated with EPA @ r = 0.40 |
| Metabolomics    | Metabolo<br>n | 1-(1-enyl-stearoyl)-2-docosahexaenoyl-GPE (P-18:0/22:6)*  | Correlated with EPA @ r = 0.44 |
| Metabolomics    | Metabolo<br>n | 1-(1-enyl-palmitoyl)-2-oleoyl-GPC (P-16:0/18:1)*          | Correlated with EPA @ r = 0.29 |
| Metabolomics    | Metabolo<br>n | 1-(1-enyl-palmitoyl)-2-docosahexaenoyl-GPC (P-16:0/22:6)* | Correlated with EPA @ r = 0.48 |
| Metabolomics    | Metabolo<br>n | 1-(1-enyl-stearoyl)-2-docosahexaenoyl-GPC (P-18:0/22:6)*  | Correlated with EPA @ r = 0.43 |
| Metabolomics    | Metabolo<br>n | 1-margaroyl-2-oleoyl-GPC (17:0/18:1)*                     | Correlated with EPA @ r = 0.24 |
| Metabolomics    | Metabolo<br>n | 1-pentadecanoyl-2-docosahexaenoyl-GPC (15:0/22:6)*        | Correlated with EPA @ r = 0.47 |
| Metabolomics    | Metabolo<br>n | 1-margaroyl-2-docosahexaenoyl-GPC (17:0/22:6)*            | Correlated with EPA @ r = 0.44 |
| Metabolomics    | Metabolo<br>n | 1-oleoyl-2-docosahexaenoyl-GPC (18:1/22:6)*               | Correlated with EPA @ r = 0.34 |
| Metabolomics    | Metabolo<br>n | 1-linoleoyl-2-docosahexaenoyl-GPC (18:2/22:6)*            | Correlated with EPA @ r = 0.42 |
| Metabolomics    | Metabolo<br>n | 1-myristoyl-2-docosahexaenoyl-GPC (14:0/22:6)*            | Correlated with EPA @ r = 0.45 |
| Metabolomics    | Metabolo<br>n | 1-stearoyl-2-docosapentaenoyl-GPC (18:0/22:5n3)*          | Correlated with EPA @ r = 0.34 |
| Metabolomics    | Metabolo<br>n | 1-(1-enyl-oleoyl)-2-docosahexaenoyl-GPE (P-18:1/22:6)*    | Correlated with EPA @ r = 0.42 |
| Metabolomics    | Metabolo<br>n | perfluorooctanesulfonate (PFOS)                           | Correlated with EPA @ r = 0.26 |
| Metabolomics    | Metabolo<br>n | ximenoylcarnitine (C26:1)*                                | Correlated with EPA @ r = 0.25 |
| Metabolomics    | Metabolo<br>n | eicosenoylcarnitine (C20:1)*                              | Correlated with EPA @ r = 0.25 |
| Metabolomics    | Metabolo<br>n | carotene diol (1)                                         | Correlated with EPA @ r = 0.34 |
| Metabolomics    | Metabolo<br>n | carotene diol (2)                                         | Correlated with EPA @ r = 0.23 |
| Metabolomics    | Metabolo<br>n | hydroxy-CMPF*                                             | Correlated with EPA @ r = 0.59 |
| Metabolomics    | Metabolo<br>n | 3-carboxy-4-methyl-5-pentyl-2-furanpropionate (3-CMPFP)** | Correlated with EPA @ r = 0.35 |
| Metabolomics    | Metabolo<br>n | perfluorooctanoate (PFOA)                                 | Correlated with EPA @ r = 0.24 |
| Metabolomics    | Metabolo<br>n | branched chain 14:0 dicarboxylic acid**                   | Correlated with EPA @ r = 0.27 |
| Metabolomics    | Metabolo<br>n | 5-oxoproline                                              | Correlated with EPA @ r = 0.23 |
| Metabolomics    | Metabolo<br>n | pantothenate                                              | Correlated with EPA @ r = 0.27 |

| <b>Modality</b> | <b>Vendor</b> | <b>Measurement</b>                                  | <b>Reason for exclusion</b>              |
|-----------------|---------------|-----------------------------------------------------|------------------------------------------|
| Metabolomics    | Metabolon     | glycerate                                           | Correlated with EPA @ r = 0.25           |
| Metabolomics    | Metabolon     | erucate (22:1n9)                                    | Correlated with EPA @ r = 0.27           |
| Metabolomics    | Metabolon     | alpha-tocopherol                                    | Correlated with EPA @ r = 0.27           |
| Metabolomics    | Metabolon     | 1-linoleoyl-GPC (18:2)                              | Correlated with LINOLEIC_ACID @ r = 0.35 |
| Metabolomics    | Metabolon     | 2-linoleoyl-GPC (18:2)*                             | Correlated with LINOLEIC_ACID @ r = 0.29 |
| Metabolomics    | Metabolon     | 1-linoleoyl-GPE (18:2)*                             | Correlated with LINOLEIC_ACID @ r = 0.26 |
| Metabolomics    | Metabolon     | palmitoyl sphingomyelin (d18:1/16:0)                | Correlated with LINOLEIC_ACID @ r = 0.34 |
| Metabolomics    | Metabolon     | sphingomyelin (d18:2/16:0, d18:1/16:1)*             | Correlated with LINOLEIC_ACID @ r = 0.23 |
| Metabolomics    | Metabolon     | 1,2-dilinoleoyl-GPC (18:2/18:2)                     | Correlated with LINOLEIC_ACID @ r = 0.56 |
| Metabolomics    | Metabolon     | palmitoyl dihydrosphingomyelin (d18:0/16:0)*        | Correlated with LINOLEIC_ACID @ r = 0.25 |
| Metabolomics    | Metabolon     | 1-stearoyl-2-linoleoyl-GPC (18:0/18:2)*             | Correlated with LINOLEIC_ACID @ r = 0.45 |
| Metabolomics    | Metabolon     | 1-stearoyl-2-linoleoyl-GPI (18:0/18:2)              | Correlated with LINOLEIC_ACID @ r = 0.27 |
| Metabolomics    | Metabolon     | 1-(1-enyl-palmitoyl)-2-linoleoyl-GPC (P-16:0/18:2)* | Correlated with LINOLEIC_ACID @ r = 0.38 |
| Metabolomics    | Metabolon     | 1-palmityl-2-oleoyl-GPC (O-16:0/18:1)*              | Correlated with LINOLEIC_ACID @ r = 0.23 |
| Metabolomics    | Metabolon     | 1-pentadecanoyl-2-linoleoyl-GPC (15:0/18:2)*        | Correlated with LINOLEIC_ACID @ r = 0.32 |
| Metabolomics    | Metabolon     | 1-margaroyl-2-linoleoyl-GPC (17:0/18:2)*            | Correlated with LINOLEIC_ACID @ r = 0.45 |
| Metabolomics    | Metabolon     | 1-(1-enyl-palmitoyl)-2-linoleoyl-GPE (P-16:0/18:2)* | Correlated with LINOLEIC_ACID @ r = 0.26 |
| Metabolomics    | Metabolon     | 1-palmityl-2-linoleoyl-GPC (O-16:0/18:2)*           | Correlated with LINOLEIC_ACID @ r = 0.39 |
| Metabolomics    | Metabolon     | 1-(1-enyl-stearoyl)-2-linoleoyl-GPC (P-18:0/18:2)*  | Correlated with LINOLEIC_ACID @ r = 0.32 |
| Metabolomics    | Metabolon     | 1-(1-enyl-stearoyl)-2-linoleoyl-GPE (P-18:0/18:2)*  | Correlated with LINOLEIC_ACID @ r = 0.31 |
| Metabolomics    | Metabolon     | 1-linoleoyl-2-linolenoyl-GPC (18:2/18:3)*           | Correlated with LINOLEIC_ACID @ r = 0.44 |
| Metabolomics    | Metabolon     | glycosyl-N-behenoyl-sphingadienine (d18:2/22:0)*    | Correlated with LINOLEIC_ACID @ r = 0.25 |
| Metabolomics    | Metabolon     | linoleoylcholine*                                   | Correlated with LINOLEIC_ACID @ r = 0.24 |
| Metabolomics    | Metabolon     | sphingomyelin (d18:2/24:2)*                         | Correlated with LINOLEIC_ACID @ r = 0.24 |
| Metabolomics    | Metabolon     | carotene diol (1)                                   | Correlated with LINOLEIC_ACID @ r = 0.23 |
| Metabolomics    | Metabolon     | carotene diol (2)                                   | Correlated with LINOLEIC_ACID @ r = 0.25 |
| Metabolomics    | Metabolon     | hydroxypalmitoyl sphingomyelin (d18:1/16:0(OH))**   | Correlated with LINOLEIC_ACID @ r = 0.42 |

| <b>Modality</b> | <b>Vendor</b> | <b>Measurement</b>                                        | <b>Reason for exclusion</b>              |
|-----------------|---------------|-----------------------------------------------------------|------------------------------------------|
| Metabolomics    | Metabolon     | palmitoyl-sphingosine-phosphoethanolamine (d18:1/16:0)    | Correlated with LINOLEIC_ACID @ r = 0.27 |
| Metabolomics    | Metabolon     | 1-palmitoyl-2-linoleoyl-GPC (16:0/18:2)                   | Correlated with LINOLEIC_ACID @ r = 0.29 |
| Metabolomics    | Metabolon     | docosahexaenoate (DHA; 22:6n3)                            | Correlated with OMEGA-3 INDEX @ r = 0.53 |
| Metabolomics    | Metabolon     | cysteine s-sulfate                                        | Correlated with OMEGA-3 INDEX @ r = 0.37 |
| Metabolomics    | Metabolon     | oxalate (ethanedioate)                                    | Correlated with OMEGA-3 INDEX @ r = 0.31 |
| Metabolomics    | Metabolon     | threonate                                                 | Correlated with OMEGA-3 INDEX @ r = 0.38 |
| Metabolomics    | Metabolon     | pyridoxate                                                | Correlated with OMEGA-3 INDEX @ r = 0.26 |
| Metabolomics    | Metabolon     | 3-carboxy-4-methyl-5-propyl-2-furanpropanoate (CMPF)      | Correlated with OMEGA-3 INDEX @ r = 0.65 |
| Metabolomics    | Metabolon     | docosapentaenoate (n3 DPA; 22:5n3)                        | Correlated with OMEGA-3 INDEX @ r = 0.23 |
| Metabolomics    | Metabolon     | 1-docosahexaenoyl-GPC (22:6)*                             | Correlated with OMEGA-3 INDEX @ r = 0.53 |
| Metabolomics    | Metabolon     | 1-docosahexaenoyl-GPE (22:6)*                             | Correlated with OMEGA-3 INDEX @ r = 0.49 |
| Metabolomics    | Metabolon     | ergothioneine                                             | Correlated with OMEGA-3 INDEX @ r = 0.36 |
| Metabolomics    | Metabolon     | 1-eicosapentaenoyl-GPE (20:5)*                            | Correlated with OMEGA-3 INDEX @ r = 0.47 |
| Metabolomics    | Metabolon     | 1-eicosapentaenoyl-GPC (20:5)*                            | Correlated with OMEGA-3 INDEX @ r = 0.54 |
| Metabolomics    | Metabolon     | 1-eicosenoyl-GPC (20:1)*                                  | Correlated with OMEGA-3 INDEX @ r = 0.23 |
| Metabolomics    | Metabolon     | methyl glucopyranoside (alpha + beta)                     | Correlated with OMEGA-3 INDEX @ r = 0.23 |
| Metabolomics    | Metabolon     | 1-palmitoyl-2-docosahexaenoyl-GPC (16:0/22:6)             | Correlated with OMEGA-3 INDEX @ r = 0.54 |
| Metabolomics    | Metabolon     | 1-stearoyl-2-docosahexaenoyl-GPC (18:0/22:6)              | Correlated with OMEGA-3 INDEX @ r = 0.55 |
| Metabolomics    | Metabolon     | 1-(1-enyl-stearoyl)-2-oleoyl-GPC (P-18:0/18:1)            | Correlated with OMEGA-3 INDEX @ r = 0.28 |
| Metabolomics    | Metabolon     | 1-palmitoyl-2-eicosapentaenoyl-GPC (16:0/20:5)*           | Correlated with OMEGA-3 INDEX @ r = 0.49 |
| Metabolomics    | Metabolon     | 1-palmitoyl-2-docosahexaenoyl-GPE (16:0/22:6)*            | Correlated with OMEGA-3 INDEX @ r = 0.26 |
| Metabolomics    | Metabolon     | 1-(1-enyl-palmitoyl)-2-docosahexaenoyl-GPE (P-16:0/22:6)* | Correlated with OMEGA-3 INDEX @ r = 0.49 |
| Metabolomics    | Metabolon     | 1-(1-enyl-stearoyl)-2-docosahexaenoyl-GPE (P-18:0/22:6)*  | Correlated with OMEGA-3 INDEX @ r = 0.53 |
| Metabolomics    | Metabolon     | 1-(1-enyl-palmitoyl)-2-oleoyl-GPC (P-16:0/18:1)*          | Correlated with OMEGA-3 INDEX @ r = 0.33 |
| Metabolomics    | Metabolon     | 1-(1-enyl-palmitoyl)-2-docosahexaenoyl-GPC (P-16:0/22:6)* | Correlated with OMEGA-3 INDEX @ r = 0.56 |
| Metabolomics    | Metabolon     | 1-(1-enyl-stearoyl)-2-docosahexaenoyl-GPC (P-18:0/22:6)*  | Correlated with OMEGA-3 INDEX @ r = 0.54 |
| Metabolomics    | Metabolon     | 1-palmitoyl-2-oleoyl-GPC (O-16:0/18:1)*                   | Correlated with OMEGA-3 INDEX @ r = 0.22 |

| <b>Modality</b> | <b>Vendor</b> | <b>Measurement</b>                                        | <b>Reason for exclusion</b>                      |
|-----------------|---------------|-----------------------------------------------------------|--------------------------------------------------|
| Metabolomics    | Metabolon     | 1-pentadecanoyl-2-docosahexaenoyl-GPC (15:0/22:6)*        | Correlated with OMEGA-3 INDEX @ r = 0.51         |
| Metabolomics    | Metabolon     | 1-margaroyl-2-docosahexaenoyl-GPC (17:0/22:6)*            | Correlated with OMEGA-3 INDEX @ r = 0.57         |
| Metabolomics    | Metabolon     | 1-oleoyl-2-docosahexaenoyl-GPC (18:1/22:6)*               | Correlated with OMEGA-3 INDEX @ r = 0.38         |
| Metabolomics    | Metabolon     | 1-linoleoyl-2-docosahexaenoyl-GPC (18:2/22:6)*            | Correlated with OMEGA-3 INDEX @ r = 0.36         |
| Metabolomics    | Metabolon     | 1-(1-enyl-stearoyl)-2-linoleoyl-GPC (P-18:0/18:2)*        | Correlated with OMEGA-3 INDEX @ r = 0.23         |
| Metabolomics    | Metabolon     | 1-myristoyl-2-docosahexaenoyl-GPC (14:0/22:6)*            | Correlated with OMEGA-3 INDEX @ r = 0.35         |
| Metabolomics    | Metabolon     | 1-(1-enyl-palmitoyl)-2-palmitoyl-GPC (P-16:0/16:0)*       | Correlated with OMEGA-3 INDEX @ r = 0.24         |
| Metabolomics    | Metabolon     | 1-(1-enyl-oleoyl)-2-docosahexaenoyl-GPE (P-18:1/22:6)*    | Correlated with OMEGA-3 INDEX @ r = 0.51         |
| Metabolomics    | Metabolon     | perfluorooctanesulfonate (PFOS)                           | Correlated with OMEGA-3 INDEX @ r = 0.26         |
| Metabolomics    | Metabolon     | eicosenoylcarnitine (C20:1)*                              | Correlated with OMEGA-3 INDEX @ r = 0.25         |
| Metabolomics    | Metabolon     | carotene diol (1)                                         | Correlated with OMEGA-3 INDEX @ r = 0.35         |
| Metabolomics    | Metabolon     | carotene diol (2)                                         | Correlated with OMEGA-3 INDEX @ r = 0.29         |
| Metabolomics    | Metabolon     | hydroxy-CMPF*                                             | Correlated with OMEGA-3 INDEX @ r = 0.66         |
| Metabolomics    | Metabolon     | 3-carboxy-4-methyl-5-pentyl-2-furanpropionate (3-CMPFP)** | Correlated with OMEGA-3 INDEX @ r = 0.31         |
| Metabolomics    | Metabolon     | branched chain 14:0 dicarboxylic acid**                   | Correlated with OMEGA-3 INDEX @ r = 0.28         |
| Metabolomics    | Metabolon     | pantothenate                                              | Correlated with OMEGA-3 INDEX @ r = 0.24         |
| Metabolomics    | Metabolon     | glycerate                                                 | Correlated with OMEGA-3 INDEX @ r = 0.24         |
| Metabolomics    | Metabolon     | erucate (22:1n9)                                          | Correlated with OMEGA-3 INDEX @ r = 0.27         |
| Metabolomics    | Metabolon     | 1-palmitoylglycerol (16:0)                                | Correlated with OMEGA-6/OMEGA-3 RATIO @ r = 0.24 |
| Metabolomics    | Metabolon     | 1-adrenoyl-GPC (22:4)*                                    | Correlated with OMEGA-6/OMEGA-3 RATIO @ r = 0.35 |
| Metabolomics    | Metabolon     | 1-docosapentaenoyl-GPC (22:5n6)*                          | Correlated with OMEGA-6/OMEGA-3 RATIO @ r = 0.24 |
| Metabolomics    | Metabolon     | 1-myristoyl-2-linoleoyl-GPC (14:0/18:2)*                  | Correlated with OMEGA-6/OMEGA-3 RATIO @ r = 0.25 |
| Metabolomics    | Metabolon     | 1-stearoyl-2-docosapentaenoyl-GPC (18:0/22:5n6)*          | Correlated with OMEGA-6/OMEGA-3 RATIO @ r = 0.35 |
| Metabolomics    | Metabolon     | 1-palmitoyl-2-adrenoyl-GPC (16:0/22:4)*                   | Correlated with OMEGA-6/OMEGA-3 RATIO @ r = 0.29 |



| <b>Modality</b> | <b>Vendor</b> | <b>Measurement</b>                                        | <b>Reason for exclusion</b>                      |
|-----------------|---------------|-----------------------------------------------------------|--------------------------------------------------|
| Metabolomics    | Metabolo<br>n | 1-stearoyl-2-adrenoyl-GPC (18:0/22:4)*                    | Correlated with OMEGA-6/OMEGA-3 RATIO @ r = 0.30 |
| Metabolomics    | Metabolo<br>n | sphingomyelin (d18:2/18:1)*                               | Correlated with OMEGA-6/OMEGA-3 RATIO @ r = 0.29 |
| Metabolomics    | Metabolo<br>n | docosahexaenoate (DHA; 22:6n3)                            | Correlated with OMEGA_3_TOTAL @ r = 0.53         |
| Metabolomics    | Metabolo<br>n | cysteine s-sulfate                                        | Correlated with OMEGA_3_TOTAL @ r = 0.37         |
| Metabolomics    | Metabolo<br>n | oxalate (ethanedioate)                                    | Correlated with OMEGA_3_TOTAL @ r = 0.31         |
| Metabolomics    | Metabolo<br>n | threonate                                                 | Correlated with OMEGA_3_TOTAL @ r = 0.38         |
| Metabolomics    | Metabolo<br>n | pyridoxate                                                | Correlated with OMEGA_3_TOTAL @ r = 0.26         |
| Metabolomics    | Metabolo<br>n | 3-carboxy-4-methyl-5-propyl-2-furanpropanoate (CMPF)      | Correlated with OMEGA_3_TOTAL @ r = 0.66         |
| Metabolomics    | Metabolo<br>n | docosapentaenoate (n3 DPA; 22:5n3)                        | Correlated with OMEGA_3_TOTAL @ r = 0.23         |
| Metabolomics    | Metabolo<br>n | 1-docosahexaenoyl-GPC (22:6)*                             | Correlated with OMEGA_3_TOTAL @ r = 0.54         |
| Metabolomics    | Metabolo<br>n | 1-docosahexaenoyl-GPE (22:6)*                             | Correlated with OMEGA_3_TOTAL @ r = 0.49         |
| Metabolomics    | Metabolo<br>n | ergothioneine                                             | Correlated with OMEGA_3_TOTAL @ r = 0.36         |
| Metabolomics    | Metabolo<br>n | 1-eicosapentaenoyl-GPE (20:5)*                            | Correlated with OMEGA_3_TOTAL @ r = 0.48         |
| Metabolomics    | Metabolo<br>n | 1-eicosapentaenoyl-GPC (20:5)*                            | Correlated with OMEGA_3_TOTAL @ r = 0.54         |
| Metabolomics    | Metabolo<br>n | 1-eicosenoyl-GPC (20:1)*                                  | Correlated with OMEGA_3_TOTAL @ r = 0.23         |
| Metabolomics    | Metabolo<br>n | methyl glucopyranoside (alpha + beta)                     | Correlated with OMEGA_3_TOTAL @ r = 0.23         |
| Metabolomics    | Metabolo<br>n | 1-palmitoyl-2-docosahexaenoyl-GPC (16:0/22:6)             | Correlated with OMEGA_3_TOTAL @ r = 0.54         |
| Metabolomics    | Metabolo<br>n | 1-stearoyl-2-docosahexaenoyl-GPC (18:0/22:6)              | Correlated with OMEGA_3_TOTAL @ r = 0.55         |
| Metabolomics    | Metabolo<br>n | 1-(1-enyl-stearoyl)-2-oleoyl-GPC (P-18:0/18:1)            | Correlated with OMEGA_3_TOTAL @ r = 0.28         |
| Metabolomics    | Metabolo<br>n | 1-palmitoyl-2-eicosapentaenoyl-GPC (16:0/20:5)*           | Correlated with OMEGA_3_TOTAL @ r = 0.49         |
| Metabolomics    | Metabolo<br>n | 1-palmitoyl-2-docosahexaenoyl-GPE (16:0/22:6)*            | Correlated with OMEGA_3_TOTAL @ r = 0.26         |
| Metabolomics    | Metabolo<br>n | 1-(1-enyl-palmitoyl)-2-docosahexaenoyl-GPE (P-16:0/22:6)* | Correlated with OMEGA_3_TOTAL @ r = 0.49         |
| Metabolomics    | Metabolo<br>n | 1-(1-enyl-stearoyl)-2-docosahexaenoyl-GPE (P-18:0/22:6)*  | Correlated with OMEGA_3_TOTAL @ r = 0.53         |
| Metabolomics    | Metabolo<br>n | 1-(1-enyl-palmitoyl)-2-oleoyl-GPC (P-16:0/18:1)*          | Correlated with OMEGA_3_TOTAL @ r = 0.33         |
| Metabolomics    | Metabolo<br>n | 1-(1-enyl-palmitoyl)-2-docosahexaenoyl-GPC (P-16:0/22:6)* | Correlated with OMEGA_3_TOTAL @ r = 0.56         |
| Metabolomics    | Metabolo<br>n | 1-(1-enyl-stearoyl)-2-docosahexaenoyl-GPC (P-18:0/22:6)*  | Correlated with OMEGA_3_TOTAL @ r = 0.54         |

| Modality     | Vendor     | Measurement                                               | Reason for exclusion                     |
|--------------|------------|-----------------------------------------------------------|------------------------------------------|
| Metabolomics | Metabolo n | 1-pentadecanoyl-2-docosahexaenoyl-GPC (15:0/22:6)*        | Correlated with OMEGA_3_TOTAL @ r = 0.51 |
| Metabolomics | Metabolo n | 1-margaroyl-2-docosahexaenoyl-GPC (17:0/22:6)*            | Correlated with OMEGA_3_TOTAL @ r = 0.57 |
| Metabolomics | Metabolo n | 1-oleoyl-2-docosahexaenoyl-GPC (18:1/22:6)*               | Correlated with OMEGA_3_TOTAL @ r = 0.38 |
| Metabolomics | Metabolo n | 1-linoleoyl-2-docosahexaenoyl-GPC (18:2/22:6)*            | Correlated with OMEGA_3_TOTAL @ r = 0.36 |
| Metabolomics | Metabolo n | 1-(1-enyl-stearoyl)-2-linoleoyl-GPC (P-18:0/18:2)*        | Correlated with OMEGA_3_TOTAL @ r = 0.23 |
| Metabolomics | Metabolo n | 1-myristoyl-2-docosahexaenoyl-GPC (14:0/22:6)*            | Correlated with OMEGA_3_TOTAL @ r = 0.35 |
| Metabolomics | Metabolo n | 1-(1-enyl-palmitoyl)-2-palmitoyl-GPC (P-16:0/16:0)*       | Correlated with OMEGA_3_TOTAL @ r = 0.24 |
| Metabolomics | Metabolo n | 1-(1-enyl-oleoyl)-2-docosahexaenoyl-GPE (P-18:1/22:6)*    | Correlated with OMEGA_3_TOTAL @ r = 0.51 |
| Metabolomics | Metabolo n | perfluorooctanesulfonate (PFOS)                           | Correlated with OMEGA_3_TOTAL @ r = 0.26 |
| Metabolomics | Metabolo n | eicosenoylcarnitine (C20:1)*                              | Correlated with OMEGA_3_TOTAL @ r = 0.25 |
| Metabolomics | Metabolo n | carotene diol (1)                                         | Correlated with OMEGA_3_TOTAL @ r = 0.35 |
| Metabolomics | Metabolo n | carotene diol (2)                                         | Correlated with OMEGA_3_TOTAL @ r = 0.29 |
| Metabolomics | Metabolo n | hydroxy-CMPF*                                             | Correlated with OMEGA_3_TOTAL @ r = 0.66 |
| Metabolomics | Metabolo n | 3-carboxy-4-methyl-5-pentyl-2-furanpropionate (3-CMPFP)** | Correlated with OMEGA_3_TOTAL @ r = 0.31 |
| Metabolomics | Metabolo n | branched chain 14:0 dicarboxylic acid**                   | Correlated with OMEGA_3_TOTAL @ r = 0.28 |
| Metabolomics | Metabolo n | pantothenate                                              | Correlated with OMEGA_3_TOTAL @ r = 0.24 |
| Metabolomics | Metabolo n | glycerate                                                 | Correlated with OMEGA_3_TOTAL @ r = 0.24 |
| Metabolomics | Metabolo n | erucate (22:1n9)                                          | Correlated with OMEGA_3_TOTAL @ r = 0.27 |
| Metabolomics | Metabolo n | palmitoyl sphingomyelin (d18:1/16:0)                      | Correlated with OMEGA_6_TOTAL @ r = 0.23 |
| Metabolomics | Metabolo n | sphingomyelin (d18:2/16:0, d18:1/16:1)*                   | Correlated with OMEGA_6_TOTAL @ r = 0.25 |
| Metabolomics | Metabolo n | sphingomyelin (d18:1/20:1, d18:2/20:0)*                   | Correlated with OMEGA_6_TOTAL @ r = 0.23 |
| Metabolomics | Metabolo n | 1,2-dilinoleoyl-GPC (18:2/18:2)                           | Correlated with OMEGA_6_TOTAL @ r = 0.31 |
| Metabolomics | Metabolo n | 1-(1-enyl-stearoyl)-2-arachidonoyl-GPC (P-18:0/20:4)      | Correlated with OMEGA_6_TOTAL @ r = 0.27 |
| Metabolomics | Metabolo n | 1-(1-enyl-palmitoyl)-2-linoleoyl-GPC (P-16:0/18:2)*       | Correlated with OMEGA_6_TOTAL @ r = 0.37 |
| Metabolomics | Metabolo n | 1-stearyl-2-arachidonoyl-GPC (O-18:0/20:4)*               | Correlated with OMEGA_6_TOTAL @ r = 0.30 |
| Metabolomics | Metabolo n | lactosyl-N-palmitoyl-sphingosine (d18:1/16:0)             | Correlated with OMEGA_6_TOTAL @ r = 0.23 |
| Metabolomics | Metabolo n | 1-(1-enyl-palmitoyl)-2-linoleoyl-GPE (P-16:0/18:2)*       | Correlated with OMEGA_6_TOTAL @ r = 0.25 |

| Modality     | Vendor    | Measurement                                               | Reason for exclusion                            |
|--------------|-----------|-----------------------------------------------------------|-------------------------------------------------|
| Metabolomics | Metabolon | 1-palmitoyl-2-linoleoyl-GPC (O-16:0/18:2)*                | Correlated with OMEGA_6_TOTAL @ r = 0.36        |
| Metabolomics | Metabolon | 1-(1-enyl-stearoyl)-2-linoleoyl-GPC (P-18:0/18:2)*        | Correlated with OMEGA_6_TOTAL @ r = 0.26        |
| Metabolomics | Metabolon | 1-palmitoyl-2-palmitoyl-GPC (O-16:0/16:0)*                | Correlated with OMEGA_6_TOTAL @ r = 0.25        |
| Metabolomics | Metabolon | 1-stearoyl-2-docosapentaenoyl-GPC (O-18:0/22:5n3)*        | Correlated with OMEGA_6_TOTAL @ r = 0.24        |
| Metabolomics | Metabolon | glycosyl ceramide (d18:2/24:1, d18:1/24:2)*               | Correlated with OMEGA_6_TOTAL @ r = 0.23        |
| Metabolomics | Metabolon | sphingomyelin (d18:2/18:1)*                               | Correlated with OMEGA_6_TOTAL @ r = 0.30        |
| Metabolomics | Metabolon | sphingomyelin (d18:2/24:2)*                               | Correlated with OMEGA_6_TOTAL @ r = 0.33        |
| Metabolomics | Metabolon | hydroxypalmitoyl sphingomyelin (d18:1/16:0(OH))**         | Correlated with OMEGA_6_TOTAL @ r = 0.25        |
| Metabolomics | Metabolon | docosahexaenoate (DHA; 22:6n3)                            | Correlated with VITAMIN D, 25-OH TOT @ r = 0.28 |
| Metabolomics | Metabolon | cysteine s-sulfate                                        | Correlated with VITAMIN D, 25-OH TOT @ r = 0.36 |
| Metabolomics | Metabolon | oxalate (ethanedioate)                                    | Correlated with VITAMIN D, 25-OH TOT @ r = 0.31 |
| Metabolomics | Metabolon | threonate                                                 | Correlated with VITAMIN D, 25-OH TOT @ r = 0.31 |
| Metabolomics | Metabolon | pyridoxate                                                | Correlated with VITAMIN D, 25-OH TOT @ r = 0.29 |
| Metabolomics | Metabolon | 3-carboxy-4-methyl-5-propyl-2-furanpropanoate (CMPF)      | Correlated with VITAMIN D, 25-OH TOT @ r = 0.31 |
| Metabolomics | Metabolon | 1-docosahexaenoyl-GPC (22:6)*                             | Correlated with VITAMIN D, 25-OH TOT @ r = 0.23 |
| Metabolomics | Metabolon | 1-docosahexaenoyl-GPE (22:6)*                             | Correlated with VITAMIN D, 25-OH TOT @ r = 0.26 |
| Metabolomics | Metabolon | methionine sulfone                                        | Correlated with VITAMIN D, 25-OH TOT @ r = 0.26 |
| Metabolomics | Metabolon | 1-palmitoyl-2-docosahexaenoyl-GPC (16:0/22:6)             | Correlated with VITAMIN D, 25-OH TOT @ r = 0.23 |
| Metabolomics | Metabolon | 1-(1-enyl-stearoyl)-2-oleoyl-GPC (P-18:0/18:1)            | Correlated with VITAMIN D, 25-OH TOT @ r = 0.23 |
| Metabolomics | Metabolon | 1-(1-enyl-stearoyl)-2-docosahexaenoyl-GPE (P-18:0/22:6)*  | Correlated with VITAMIN D, 25-OH TOT @ r = 0.26 |
| Metabolomics | Metabolon | 1-(1-enyl-palmitoyl)-2-oleoyl-GPC (P-16:0/18:1)*          | Correlated with VITAMIN D, 25-OH TOT @ r = 0.29 |
| Metabolomics | Metabolon | 1-(1-enyl-palmitoyl)-2-docosahexaenoyl-GPC (P-16:0/22:6)* | Correlated with VITAMIN D, 25-OH TOT @ r = 0.25 |
| Metabolomics | Metabolon | 1-(1-enyl-stearoyl)-2-docosahexaenoyl-GPC (P-18:0/22:6)*  | Correlated with VITAMIN D, 25-OH TOT @ r = 0.28 |
| Metabolomics | Metabolon | 1-palmitoyl-2-oleoyl-GPC (O-16:0/18:1)*                   | Correlated with VITAMIN D, 25-OH TOT @ r = 0.24 |
| Metabolomics | Metabolon | 1-pentadecanoyl-2-docosahexaenoyl-GPC (15:0/22:6)*        | Correlated with VITAMIN D, 25-OH TOT @ r = 0.26 |
| Metabolomics | Metabolon | 1-margaroyl-2-docosahexaenoyl-GPC (17:0/22:6)*            | Correlated with VITAMIN D, 25-OH TOT @ r = 0.29 |
| Metabolomics | Metabolon | 1-oleoyl-2-docosahexaenoyl-GPC (18:1/22:6)*               | Correlated with VITAMIN D, 25-OH TOT @ r = 0.26 |

| <b>Modality</b> | <b>Vendor</b> | <b>Measurement</b>                                     | <b>Reason for exclusion</b>                       |
|-----------------|---------------|--------------------------------------------------------|---------------------------------------------------|
| Metabolomics    | Metabolon     | 1-(1-enyl-oleoyl)-2-docosahexaenoyl-GPE (P-18:1/22:6)* | Correlated with VITAMIN D, 25-OH TOT @ $r = 0.27$ |
| Metabolomics    | Metabolon     | carotene diol (1)                                      | Correlated with VITAMIN D, 25-OH TOT @ $r = 0.23$ |
| Metabolomics    | Metabolon     | hydroxy-CMPF*                                          | Correlated with VITAMIN D, 25-OH TOT @ $r = 0.39$ |
| Metabolomics    | Metabolon     | pantothenate                                           | Correlated with VITAMIN D, 25-OH TOT @ $r = 0.34$ |
| Metabolomics    | Metabolon     | glycerate                                              | Correlated with VITAMIN D, 25-OH TOT @ $r = 0.24$ |

Note: some measures may be marked for exclusion for multiple reasons
